# Supplementary material for: Genome-Wide Analysis of Sorghum GT47 Family Reveals Functional Divergences of MUR3-Like Genes
Source: Front Plant Sci. 2018 Dec 14;9:1773. doi: 10.3389/fpls.2018.01773 (PMC6302003; doi:10.3389/fpls.2018.01773)
Supplement: TABLE S1 — Protein sequences of GT47 family members from ten species (doi: 10.6084/m9.figshare.6958895). [file Table_2.XLSX]

## Sheet: Sorghum bicolor
CAZy Family _Gene ID1	Model	Chl	Chromosome position	TM region	Protein sequence
SbGT47_1	Sobic.001G228900.1	Chr1	21902831-21904226	transmembrane	MVKPSAAVSRPCFLLVTAAALWALTLYLRLLALMSVPVAFTGRVASFVPAPAADDTTNASGDPCRGRYIYVHDLPPRFNADV VQGCAAATDRWKDMCEDVRNAGLGRPLSGGALTGARFALDAIFHGRMRRYGCLTNDSSAAAAVFVPFYAGFEFARHVWGYDAAARDAASLDLVRWLVRRP EWRRAGGRDHFLVAGRTGWDFRRDVDDRNSTWGTSLFLLPAVKNMTFLVVETATMGWGNDLAVPYPTYFHPRTDSDVLSWQQRIRSSERWWFMSFVGAAR PSDPRSIRSQVMAQCGASPACRQLGCAFGSAQCHYPGDIMVLFQSSTFCLQPPGDSASRRSTFDAMVAGCIPVFFQPRSAYLQYRWHLPRDHATYSVFIP AEDVRSGNVSVEA…
SbGT47_2	Sobic.001G229000.1	Chr1	21907886-21910113	NO	MKRHNAGELPLSSPAGDGKRLLANEEEAEDKMDKYDKGRVRCSRLCFLFAVAATVSILARHCYDAGLGRGDSAGVVRIEAVP HGLPPPVHRERKIVPIARGGEPSESRHSTSSPVDAGDDADTSSKPSASRSDESANGGKTSSKQSSPSGAHAHTKQLGSHPFARALASAADKDDLCGGQYI YVHELPARFNKDMVQNCDKLSPWTDMCRYTTNGGFGPLLRGGKGAFQGNGAGWYDTDEHALDIVFHERIKRYECLTDDPSLAAAVFVPFYAGLDVARHLW GNNVSARDEMALDLASLLAKSPEWRAMGGRDHFFVAGRTTWDFRRKDDAHAEWGSRLLNLPAAKNMTALVVEASPWHLNDVAIPYPTSFHPASDEDLFFW QDRVRALNRSYLF…
SbGT47_3	Sobic.001G229100.1	Chr1	21979683-21982535	NO	MMKPTTALELSFQNDGADKPDGGSTGGVLWPSRICYLVAVATTLWAVASILFPPSAFPLPPLMSSVTVVNQHPPPSEDDRTN VTADRCAGRYIYVYRLPPRFNDDIVRGCRALRPWMDMCPYMANCGLGRPLRDEGGGGGGVFPGRGWYATDQFMLDVIFRCRMRRYECLTGDPARASAVFV PAYASLDGGRYLWNSTATRDALALDLVAWLARRPEWRATGGRDHFLVAGRTAWDFLRKTDGDDDWGTKLLNIPAVRNMTALVLEMDPWNPSSHLAVPYPT NFHPATAADVRAWQAKARAFKRRWLFSFVGAARPGSNKTVRAEILQQCGASSRCGMFRCNKGSQCEAAPGAMMRVLESSSFCLQPRGDTATRRSTFDAVL AGCIPVFFHPDSA…
SbGT47_4	Sobic.001G303300.1	Chr1	51494553-51496793	NO	MVNPLFIFLPLLSVAAGTDGPDPCVGRRIHIRSLPPRFNTDLLRHCGADAFPLADPSAAATSTPPCESLANHGLGPRTHPRS RSWYRTDARLLEAFFHRRILERDCLADDPADADAVFLPYYAALDALPYVLDPGLLDESARHGVALAEFLSRDQARILSRRHGHDHFLVVAGSAWDYAQSP SVEPRLWGSTSLLRLPELANFTFLTLESRTWPWQEHAIPHPTSFHPSSLGHLRAWLARARRSRRATLMLFAGGASRPSRPNIRGSILSECANRTDACVVV DCSGGKCAHDPVRYMRPMLRSKFCLQPPGDTPTRRSTFDAILAGCVPVFFEDLAARRQYGWHLPPVRYDEFSVHIPKEAVVFGGVRIVEALEAVPEEEVR RMRRRVLEMAPRV…
SbGT47_5	Sobic.001G387300.1	Chr1	60265808-60268895	transmembrane	MAASSSSSSSCRSPLVWLFALAAALFFFSWYLLLDSAAGPAAARRPNQWLRLGGAGPGRKCDPAEALLRVFMYDLPPEFHFG LLDWKPPGFGGGVWPDVRDGVPEYPGGLNLQHSIEYWLTLDLLASEQGAPTPCAAVRVRRAADADVVFVPFFASLSFNRHSRVVPPARDSEDRALQRRLL EFLAARPEWRRTGGRDHVVLAHHPNGMLDARYRFWPCVFVLCDFGRYPPSVANLDKDVIAPYRHLVANFANDTAGYDDRPTLLYFQGAIYRKDGGSIRQE LYYLLKDEKDVHFSFGSVAGNGIEQSTHGMRSSKFCLNIAGDTPSSNRLFDSIVSHCVPVIISDEIELPFEDVLDYSKFSVIVRGADAVKKGFLMSLITG ISQEEWAHMWNKL…
SbGT47_6	Sobic.001G486900.1	Chr1	68533511-68538881	transmembrane	MLAIRSTKCPVAFVGVAGALVVLVTAVHVFMVPILPASLDYFGARSSISRPNNVLPAVGVVDSRLRGRFPSDSYGAVAFRGA PWKAEIGRWLAGCHANSSSVDVTEAIGAKRCEKDCSGRGVCNYNLGECRCFHGYSGKGCEEVLKLECNLPSSPEWPVGLWIVSTCAAHCDKTRAMCFCGP GTKYPDRPVAEACGFKTILPAKPDDPKLTDWKTPDLENIFTTNSSELGWCNVVPEDAYSSKVKFKEECDCKYDGLWGQFCETRVECSCINQCSGHGHCHG GFCQCDSGYFGIDCSIPSAYSLTHDWPSWLQTPVNSPDLKILNSTTIDVKAVVQKKRPLIYVYDLPAEFDSHLLEGRHYRFQCVNRIYDDKNRTVWTQQL YGAQIALYESILA…
SbGT47_7	Sobic.001G506300.1	Chr1	70248741-70250591	transmembrane	MRRRSVLPSHHDDMEKGGGKPASSRLCFLATLCAMFWVLIFYFHFAVVSNEPAVSAAQATGVRIDRSRIHIPELDGASRVDV PLAPPARASEPPPPPPVARPKETETETETETETEAEAEEEHAAQVRREEAPPKVAAPYPFERALKTAENKSDPCGGRYIYVHDLPPRFNEDMLRDCEKLS VWTNMCRFMSNDGLGPPLGNEEGVFSNTGWYGTNQFSVDVIFGNRMKQYECLTKDSSIAAAVFVPFYAGFDVARYLWGYNTTTRDAASLDLVEWLMKKPE WSVMGGRDHFLVAGRITWDFRRLTDEESDWGSKLLFLPAAKNMSMLVVESSPWNSNDFGIPYPTYFHPAKDADVFLWQDRMRSLERPWLFSFAGAPRPGD PMSIRGQLIDQCR…
SbGT47_8	Sobic.001G506500.1	Chr1	70264008-70265552	transmembrane	MERTGARSGKRWLPGLLLLAATSWLLVIYFHLAVLRGPPVVSAPRWSLAEVASDGGGGGDGQRFLLQQEERLSKLMKAPPAA TGNALSAARDERRRRDDECRGRYVYIHDLPPRFNADILANCRNWYPWMDMCVYLDNGGLGRPVDNADGVFADEGWYATDHFGLDVIFHRRMKQYDCLTSD SSRAAAVFVPFYAGFDVVQHLWGVNSTAREKDALSLDLVDWLTRRPEWRAMGGRDHFFLSGRTAYDHQRETDSEWGNKLLRLPAVQNMTVLFVEKLPWMS FDFAIPYPTYFHPARDAQVVEWQRRMRAMKRDWLFTFAGGARDDPDSIRHQLIKQCGSSSFCKLVQCGRNERNCLVPSTFMRVFQGTRFCLQPKGDTMTR RSAFDAIMAGCVP…
SbGT47_9	Sobic.001G506600.1	Chr1	70266418-70268521	transmembrane	MHLNLANSIIQLLTKSSRKAHSRARSRRAVEAKGMEKAAANALPPLRFLAVLAVTAWTFFLYFHFSVISGTVEVSHGDDDGA DRCRGRYIYMHDLPPRFNADIISNCRKTEDHWGDMCGALSNAGLGRPLADRTDGVLKSEAGWYATHQFALDSIFHNRMKQYECLTNHSAVAAAVFVPFYA GFDFVRYHWGYDNAARDAASVDLTKWLMARPEWRRMGGRDHFLVAGRTGWDFRRSNNVNPDWGTDLLVMPAGRNMSVLVLESAMLHGNDYPVPYPTYFHP RSDADVLRWQDRVRGQHRTWLMAFVGAPRPDVPINIRVRDHVIAQCKASSACTMLGCARATGSTQCHTPGNIMRLFQKTTFCLQPPGDTCTRRSAFDSMV AGCIPVFFHPGSA…
SbGT47_10	Sobic.001G506700.1	Chr1	70279754-70281390	transmembrane	MKRSAANSIVQLLVKSARKASGGARSRRGAVGMKGIGIKAAANVLPRLRILAVLGVAAWTFFLYVHFTVISSTVEVSNNGDG LAADPCRGRYIYMHDLPPRFNADIIRDCRKTEDHWGDMCGFVSNAGLGRPLAAAADDGGAITGEAGWYGTHQFALDSIFHNRMKQYECLTNHSAVASAVF VPFYAGFDFARYHWGYDNATRDAASVDLIEWLMARPQWRRMWGRDHFLVAGRTGWDFRRSSNVNPDWGTDLLAMPGGRNMTVLVLESTLKYTSDFSVPYP TYFHPRSDADVLRWQDRVRGQNRTWLMAFVGAPRPDVPMSIRIRDHVIAQCKASSACAMLGCARTLGSTQCHTPASIMRLFQKAVFCLQPPGDSCTRRSV FDSMVAGCIPVFF…
SbGT47_11	Sobic.001G506800.1	Chr1	70287716-70289574	NO	MKLSVANSIVQLLVKSGRKSGGNARSRRAVEMKGIEIKAAANVLPPPRILAALALAAWTFFLYVHFSMISGTVEVNNVEGLA DPCRGRYIYMHDLPPRFNADIIRNDCRNTEGHWGDICASLSNGGLGRPLADDGGVITGGAGWYSTHQFALDIIFHNRMKQYECLTNHPAVASAVFVPFYA GFDFARYHWGYDNATRDAASVDLTRWLMARPQWQRMGGRDHFLVAGRTGWDFRRISNLGADWGNDLLVIPGARNMSVLVLESTLKRGTDFSVPYPTYFHP RSDADVLRWQDRVRRRRRTWLMAFVGAPRPDVQMSIRVRDHVIAQCKASGACAMLSCARTPSSTQCHTPANIMRLFQKAVFCLQPPGDSPTRRSVFDSMV AGCIPVFFHTGSA…
SbGT47_12	Sobic.001G506900.1	Chr1	70291451-70293177	NO	MQLPTHSARKTGSNARSRRAVQSKGPCCPCSLRNLAILAVVAWTFFLYLDFSVISDTAEVSNGGDPCRGRYIYVYDLPPRFN TDIIRDCRKAGGRWGDMCDFLSNAGLGRPLTDDGTDGGGAGWYDTHELALDAIFHNRMKQYECLTNRSAAAAAVFVPFYAGFDFLRHHREYDKATRDAAS ADLSFWLTVQPQWRRMAGRDHFLVAGRTGWDFRRSGGGDVNPDRANGLLLTPAGRNMSLLVLESTLEHGTDFSVPYPTYFHPRSDADVLRWQDRVRGQHR TWLMVFVGAPRPDVPRRTQVRDRVIAQCQASSACATPGCTRSPAGSAQCPSAADIIRLFQKATFCLQPPGDDDDGYFYSRTRRSVFDSMVAGCIPVFFHA ASAYKQYPWHLPK…
SbGT47_13	Sobic.001G538700.1	Chr1	72955323-72958319	transmembrane	MRDPKPRRSQAAPTLAAKLRKHSTCLLLLLWFALSLCLFLSAAPPAAAPLSRSSFLRSKPRALAATTTGAAASPVRIYVYDL PARFNRDWAAADARCARHLFAAEVAVHEALLAYAGRAARPEDADLFFVPVYVSCNFSTPNGFPSLSHARGLLAEAVDLVRVRMPYWNRSAGADHVFVASH DFGACFHPMEDVAIADGIPEFLKRSILLQTFGVQGHHVCQEVEHVVIPPHVPPEVAHELPEPEKAQRDIFAFFRGKMEVHPKNISGRFYSKKVRTELLQH YGRNRKFYLKRKRFDNYRSEMARSLFCLCPLGWAPWSPRLVESVLLGCIPVIIADNIRLPFPSVLQWPEISLQVAEKDIANLEMVLDHVVATNLTMIQKN LWDPVKRKALVFN…
SbGT47_14	Sobic.001G541600.1	Chr1	73320124-73322238	NO	MLYAGGVSRPSRPNIRGAILAECANRTTSSPDVCTVVDCSAAACGLNPVAYMRPMLKANFCLQPPGDSPSRRSTFDAIVAGC IPVFFEHAAARAHYGWHLPRGRYDQFSVTIPKESVVMGDVRIADVLAAVPEDKVARMRERVLEMAPRVVYRRHGSAAELRDSTSYRDAVDLAVEGVLRRI RRRVSALEDAQPDAIYELEEDDDD*
SbGT47_15	Sobic.002G062100.1	Chr2	6022542-6026663	transmembrane	MRATTSAAAPCLPWLRSHGRASSAAAYTAVAACLLALVTFLVVAAFWDPRTQASTWFLSSSSSSSASSLTTAGGVGGEHLLA TASSYYSDGGGGGGRNSTGKEVHEEVRGQGGDDDGFLSLVNSSSGGYGAPPPHQISVTRQPPASAPAPAALAPAASPVTGNSDEVIRATPQVQRSSDIKL ERLELGLAKARSAIMEAIRNKDKRSPLPDKDYVPMGPIYRNAHAFHRSYLEMEKQLKVYVYEEGEPPVFHDGPCRSIYSTEGRFIHAMETATRLRTSDPS QAHVFFLPFSVVKMVKTIYEPGSHDMAPLKRTVADYLRVISDKYPFWNRSAGADHFMLSCHDWGPYVSSANAELFGNSIRVLCNANTSEGFDLAKDVSLP EINLRSDAVERQV…
SbGT47_16	Sobic.002G342300.1	Chr2	70860196-70866563	transmembrane	MWERGRPPRKPRPSPILVPPPPSSPPPRLNLLLPRSLLALAARAMPSRRSSPVLLLLLALSLALLFLLLSPSSPSASRFSHS LSSGSVIAYSSPASTSAPPAPVKIYLYDLPAKFTYGVVRSYTATRAPSGSADAAAALPDEQLRYPGHQHSAEWWLFKDLLRRGPRDRPVARVDDPSDADL FYVPFFSSLSLVVNPIRSPPAANASGAAAAYSDDAMQEELLEWLERQPYWRRHMGRDHVFICQDPNALYRVIDRISNAVLLVSDFGRLRSDQASLVKDVI LPYSHRINSFKGEVGVDGRPLLLFFMGNRYRKEGGKVRDALFQILENEDDVTIKHGTQSRESRRAARQGMHSSKFCLHPAGDTPSACRLFDALVSLCVPV IVSDYIELPFEDI…
SbGT47_17	Sobic.003G102700.1	Chr3	9146679-9150329	transmembrane	MPHHHHTNPSHPPAARKLLSWRRVVAACAAVAALVLLLAAAPATEDPSRWRSYLMGPLPGGTRKETVAAAVVARSFAGPAAS TSSPAEAPLSSLGEINLSARIAPAAAPSMFLVPSSSPTENFDDGSMEEPEHPEIKRNLPKESAPFLKKEPISSGLPTISPDANGEHVMDTKSVLPLTPEQ APLWSTAADEELIYAKKEITNTPLTSDDPDLYAPLFRNVSIFKRSYELMERLLKVFIYHDGAKPIFHSPELKGIYASEGWFMRLMETNQNFVVRDPNRAH LFYLPYSSRQLEHNLYVPGSNSIEPLSIFVKNYIDLISAKYPYWNRTKGADHFFVACHDWGPYTTKLHDELRKNTIKALCNADLSEGIFIRGKDVSLPET FLRSPRRPLRDIG…
SbGT47_18	Sobic.003G234701.1	Chr3	57369577-57371815	NO	MKLLKESRRHVVADAGKAHLFYLPYSSQQLRLTLYQADSHNLRPLAAYLRNFVRGLANKYPFWNRTRGADHFLVACHDWGPY TTAAHRDLRKNAIKALCNADSSEGIFTPGKDVSLPETTIRNPRRPLRYVGGLPVSRRSILAFFAGNVHGRVRPVLLRHWGDGQDDEMRVYSLLPNRVSRR MNYIQHMKNSRFCLCPMGYEVNSPRIVEAFYYECVPVIIADNFVLPLSEVLDWSAFSVVVAEKDIPDLKKILQGISPRRYVAMHSCVKRLQRHFLWHARP IKYDLFHMILHSIWLSRVNQVELEG*
SbGT47_19	Sobic.003G331000.1	Chr3	65598222-65603459	transmembrane	MAGKQFPSPAHSRPASASSRRLLAAVAASLILFTAFYFLLLSPSSHRPTPAILASPSATTSFLASLDRFLSDPHPAASAAAP GELDAAIRVQEEARLYGDEYPAWPAPAAGPLRVYVYEMPGKFTYDLLRLFRDSYRDTDNLTSNGSPVHRLIEQHSIDYWLWADLIAPESQRLLKSVVRVQ RQEEADIFYVPFFTTISYFLLEKQECKALYREALKWVTDQPAWQRSEGRDHVIPVHHPWSFKSVRRFVKKAIWLLPDMDSTGNWYKPGQVYLEKDVILPY VPNVDLCDHKCVLETQFKRSILLFFRGRLKRNAGGKIRSKLVEELKSAEDIVIEEGSAGAQGKAAAQDGMRKSLFCLSPAGDTPSSARLFDAIVSGCIPV IISDELELPFEGI…
SbGT47_20	Sobic.003G360300.1	Chr3	67807330-67811218	transmembrane	MRHHQACSRAHQVGALLLVAATFLLTRLFDRLLLDTSSSAAINPGRPSSPADLRIYVYAEDEIQGLRALLRGRDGTITAATC LKGQWGTQVKIHQFLLKSRFRTFNKDQANLFFVPSYVKCVRMTGALSDKEINQTYVKVLSQMPYFRRSGGRDHIFVFPSGAGAHLFRSWATFLNRSIILT PEGDRTDKRGTSAFNTWKDIIIPGNVDDSMVKSDARAVQPIPLTKRKYLANFLGRAQGKAGRLQLVELAKQYPDKLESPVLKLSGPNKLGRIEYFKHLRN AKFCLAPRGESSWTLRFYESFFVECVPVILSDEVELPFQNVIDYGEISIKWPSSRIGPELLEYLESISDERIEEMIGHGRQMRCLWVYAADTEPCSAMSG ILTELQKKVRRFH…
SbGT47_21	Sobic.003G405600.1	Chr3	71296761-71300966	transmembrane	MGAPSSRALALGAAFLLLLVALPSAFLYLTTSAAPAAATRATLLNLKPFSARCAPAAAAPLRVFMYDLPARFHVAMMGADDG AGFPAWPPSAGGIRRQHSVEYWMMASLQDGAAGPDGGREAVRVRDPDAADAFFVPFFSSLSFNVHGRNMTDPDTEADRLLQVEIVDILWKSKYWQRSAGR DHVIPMHHPNAFRFLRAMVNASILIVSDFGRYTKELASLRKDVVAPYVHVVDSFLDDDPPDPFEARHTLLFFRGRTVRKDEGKIRAKLGKVLKGKEGVRF EDSIATGDGIKISTEGMRSSKFCLHPAGDTPSSCRLFDAIVSHCVPVIVSSRIELPFEDEIDYSEFSLFFSVEEALRPDYLLNQLRQIPKKKWVDMWSKL KNVSHHYEFQYPP…
SbGT47_22	Sobic.003G410600.1	Chr3	71815596-71819830	transmembrane	MGPCVAAVVAILLVATCVAAAPPQQQPRKPGRISGNAVGVLDDDPVGKLKVFVYEMPRKYNKMLLDKDSRCLHHMFAAEIFM HQFLLSSAVRTLDPEEADWFYTPVYTTCDLTPQGFPLPFRAPRIMRSAIRYVATTWPFWNRTDGADHFFLTPHDFGACFHYQEERAMERGILPLLRRATL VQTFGQRNHVCLQDGSITVPPYADPHKMQAHLISPGTPRSIFVYFRGLFYDMGNDPEGGYYARGARASVWENFKDNPLFDISTEHPYTYYEDMQRAIFCL CPLGWAPWSPRLVEAVVFGCIPVIIADDIVLPFADAIPWEDISVFVAERDVPRLDSILTSIPLADILRRQRLLARESVKQALLFHQPARTGDAFHQVLNG LARKLPHGDGVFL…
SbGT47_23	Sobic.003G410700.1	Chr3	71828059-71831388	NO	MGTGSARAMAAALAVLLLACSGAVAVARAQDTERIEGSAGDVLEDDPVGRLKVYVYELPTKYNKKMVAKDSRCLSHMFAAEI FMHRFLLSSAIRTLNPEEADWFYTPVYTTCDLTPWGHPLPFKSPRIMRSAIQFISNRWPYWNRTEGADHFFVVPHDFGACFHYQEEKAIERGVLPLLRRA TLVQTFGQKDHVCLKEGSITIPPYAPPQKMKTHLVPPGTPRSIFVYFRGLFYDTANDPEGGYYARGARASVWENFKNNPLFDISTDHPPTYYEDMQRAVF CLCPLGWAPWSPRLVEAVVFGCIPVIIADDIVLPFADAIPWEEIGVFVAEDDVPKLDTILTSIPMEVILRKQRLLANPSMKQAMLFPQPAQPGDAFHQIL NGLARKLPHGEDV…
SbGT47_24	Sobic.003G410800.1	Chr3	71834059-71838056	transmembrane	MRRWVLAIAILSAASAAALFLGAEAQAVQQQGHQTERISGSAGDVLEDNPVGRLKVYVYDLPSKYNKKLLKKDPRCLNHMFA AEIFMHRFLLSSAVRTFNPEEADWFYTPVYTTCDLTPSGLPLPFKSPRMMRSAIELIATNWPYWNRSEGADHFFVTPHDFGACFHYQEEKAIGRGILPLL QRATLVQTFGQKNHVCLKDGSITIPPFAPPQKMQAHLIPADTPRSIFVYFRGLFYDTSNDPEGGYYARGARASVWENFKNNPLFDISTDHPPTYYEDMQR SVFCLCPLGWAPWSPRLVEAVVFGCIPVIIADDIVLPFADAIPWEEIGVFVAEEDVPKLDSILTSIPTDVILRKQRLLANPSMKQAMLFPQPAQAGDAFH QILNGLARKLPHG…
SbGT47_25	Sobic.004G070100.1	Chr4	5689474-5693600	transmembrane	MAGRLPGAAASSPLPRALLLLAALALFSISFLSLRSLRPAADPAVAAAADKSRPLLRLQSSSSVYHSPEAFAAGYAEMERSF KVYIYPDGDPKTFYQTPRKLTGKYASEGYFFQNIRESRFRTDDPDQAHLFFVPISPHKMRGKGTTYENMTVIVKDYVEGLINKYPYWNRTLGADHFFVTC HDVGVRAFEGLPFMVKNSIRVVCSPSYNVDFIPHKDIALPQVLQPFALPEGGNDIENRTILGFWAGHRNSKIRVILARVWENDTELAISNNRISRAIGEL VYQKQFYRTKFCICPGGSQVNSARISDSIHYGCVPVILSDYYDLPFNDALDWRKFAVILRERDVYQLKNILKSISQEEFVSLHKSLVQVQKHFVWHSPPV SYDAFHMVMYELW…
SbGT47_26	Sobic.004G159100.1	Chr4	49827888-49831203	transmembrane	MTRARAVWRPAAVVLLAVASLSCVLTPPLVSAAAGAEVAGGVARRNTERIAGSAGDVLEDNPIGRLKVFIYDLPSKYNKRIV TKDPRCLHHMFAAEIFMHRFLLSSAVRTLNPEEADWFYTPVYTTCDLTPAGLPLPFKSPRMMRSAIKFISNKWPFWNRTDGADHFFVVPHDFGACFHYQE EKATERGILPMLRRATLVQTFGQKNHVCLKEGSIIIPPYAPPQKMQAHLVPPDTPRSIFVYFRGLFYDNGNDPEGGYYARGARASLWENFKNNPLFDIST DHPVTYYEDMQRAVFCLCPLGWAPWSPRLVEAVVFGCIPVIIADDIVLPFADAIPWEDIGVFVDEEDVPKLDSILTSIPIENILRKQRLLANPSMKKAML FPQPAQPRDAFHQ…
SbGT47_27	Sobic.004G213500.1	Chr4	55611345-55613881	transmembrane	MENGRRVAAIALPLIACALVAAAFVLPPPAFLGGAAAESASVVREHFLRHVPHEPQKAPASAQLAEKVSVGPIEESLARSRA AIRRAAREAAPATATAAESVRRSFKDVGDAFVPRGAIYRNPRAFHRSYLEMERKFKIWTYKEGEPPLTHLGPSADIYSIEGQFLEEIEDPRNPFAARHPG EAHAFLLPVSVCNLVQYIYPFYRRNTTAYMAHMRRALADYVDVVAGRYPYWNRSRGADHVMVSCHDWAPLVSEANGELYANAIRVLCNANTSESFRPRKD ATLPEVNLGDGLLRRPTFGMPPENRTTLAFFAGGMHGHIRKALLGYWLGRKDPDMDIHEYLPKGQDYHALMASARFCLCPSGFEVASPRVVESVFSGCVP VIISDGYPPPFSD…
SbGT47_28	Sobic.006G059000.1	Chr6	40774079-40776804	transmembrane	MGSRKRWLPVALLLLAASALWPPVAAAAAAGGGGGEAEHAVQQHSERISGSAGDVLEDNPVGRLKVFIYDLPRKYNKKMVTK DPRCLSHMFAAEIFMHRFLLSSAVRTLNPKEADWFYTPVYTTCDLTNAGLPLPFKSPRVMRSAIQYISNKWPFWNRTDGADHFFVVPHDFAACFHYQEEK AIERGILPLLRRATLVQTFGQENHVCLKEGSIIIPPFAPPQKMQAHLISPDTPRSIFVYFRGLFYDTGNDPEGGYYARGARASLWENFKSNPLFDISTDH PATYYEDMQRAVFCLCPLGWAPWSPRLVEAVVFGCIPVIIADDIVLPFADAIPWEEIGVFVEEKDVPKLDTILTSMPIDDILRKQRLLANPSMKQAMLFP QPAQPRDAFHQIL…
SbGT47_29	Sobic.006G186100.1	Chr6	55054652-55057308	transmembrane	MPESPASPGKPPSQPGSPLNAATPFPASALLRGSVLLLAFLVLQLVLFWNILGFPSSRFLPAPGHRNTTWPNGAVNGGACDD GLIYVYDLPSEFNHDLVDDCESLWPWYSFCPYLANGGFGEAAATLPVFFNVTRNVSLPSWYNTDQFQLEVIIHRRLLSHRCRTTDPSLATAFYVPFYVGL DVGSHLWGDNSTAADRDRAGLRLLRWLNNQTSFQRSGGWDHFITLGRITWDFRRFGDDGWGTNFVVLPGIANVTRLGIEADRLDPMEVAVPYPTGFHPRT AADVRAWQRHVLSLRRSKLFGFAGAPRSGFRDDFREVLLEECEDAGSEHCRSVDCRGTRCTDNGAAVLELFLDSSFCLQPRGDSFTRRSLFDCMVAGAVP VLFWRRTAYDQYR…
SbGT47_30	Sobic.006G186200.1	Chr6	55063266-55065346	transmembrane	MALVRPEHPNPAARRPRLVVLLLLAFFALQLLVFLAFRAVRPPPATASAAAAAAVPVLASAPTRRDENDSSCGGGLVYVYDL PAAFNEDLLGMCDALAPMYSLCPYLANDGLGFPAGGTNLSSLLPQQLLGSWYASDQFALEHIVHRRLLSHRCRTTDPARAAAFFVPFYAGLAVGRHLWAA NATGADRDRDCVALLSWLHAQPWYRRSHGWDHFIALGRITWDFRRTTGAGWGSGFLTMPGVANVTRLVIERDPWDGMDVGIPYPTGFHPLTAADVCAWQR YVARRPRPRLFAFAGAPRSAIKGDFRALLLEECQAAGDAACGALDCAEGRCIKNNALVMELFMGARFCLQPRGDSFTRRSLFDCLVAGAVPVLFWRRSAY EQYGWYLPVDGRE…
SbGT47_31	Sobic.006G260900.1	Chr6	60514121-60516998	transmembrane	MKRLPVLAVPVLLLLVSLSFFLFRPTTPPVLSSRQAFEPDRRLRVYVADLPRALNYGLLDSYWSLRAADSRIEASSDPDHPP PNDHSPYPENPLIKQYSAEYWLLASLRAAATAAVRVVTDWREADVVFVPFFATLSAEMELGWGTKGAFRKKDGNEDYRRQREVVDRVTSHPAWRRSGGRD HVFVMTDPVAMWHVRAEIAPAILLVVDFGGWYKVDSKSANRNSSRMIQHTQVSLLKDVIVPYTHLLPTLLLSENKDRPTLLYFKGAKHRHRGGLVREKLW DLLGNEPDVIMEEGFPNATGREQSIKGMQTSEFCLHPAGDTPTSCRLFDAIASLCIPVIVSDEVELPYEGMIDYTEFSIFVSVRNAMRPKWLTSYLRNIP KQQKDEFRKNLAR…
SbGT47_32	Sobic.007G139300.1	Chr7	55456905-55459200	transmembrane	MVVVVVVERKMQPLPPPEHRRALRFVVFMAVSLLALSCWALVNSRINVAMPYSAFVMRDVVDKTPALTVTGVEDRHPAGLDP ASSTSVPATSDATSGSVKLSGPVIRREPLAGERERRERSETRCDADSAALRVYVYDLPAEFHFGMLGWDGKGKPAAWPDVRDARAAPHYPGGLNLQHSVA YWLTLDILSSALPPGTGTGSDDVVIRDRPCVAVRVTNASLADVFFVPFFASLSYNRHSKLRRGEKVNRNRFLQAELVRYLMRKEEWRRWGGKNHLIVPHH PNSMMEARKKLSAAMFVLSDFGRYSPHVANLKKDVIAPYMHVVRSFGDGDSPAFDQRPILAYFQGAIHRKAGGKVRQKLYQLLKDERDVHFTYGSVRQNG IRRATAGMSTSKF…
SbGT47_33	Sobic.008G021000.1	Chr8	1824133-1827730	transmembrane	MAPRGRTLLLPLAAATLLVASTIFLFAAVGARWRPADTGLPVPPHHAFPTAVPAAVTSTASSSPNATAGDKELSFLDENGQP DDPSSVSASSSTSSTTSAPVRCDPRADAAVKVFMYDLPPEFHFGLLGWSPPSADSVWPDVTPGSSPPPPRYPGGLNQQHSVEYWLTLDLLSSSSSTPPPC GRHSAVRVADSRDADLVFVPFFASLSYNRHSRPVPPEKVSRDRALQEKLVAYLTARPEWRRFGGADHVIVAHHPNSLLRARETLSPAVFVLSDFGRYPPR VASLEKDVIAPYKHMAKTFINDSAEFDDRPTLLYFRGAIYRKEGGSIRQELYYMLKDEKDVYFSFGSVQDHGASKASQGMHSSKFCLNIAGDTPSSNRLF DAIVSHCVPVIIS…
SbGT47_34	Sobic.008G077900.1	Chr8	12038554-12040495	transmembrane	MEAKYLVYYLLILGSWLLSCLLHFQYFHLSLSSFAAPRPAALVVLPIALDASFLASPTVEADNRRRSAASSVVASPSPSPSS SPSCEGRYVYMLDVPSRFDILRDCVPGSPLFDDMWSWCAITVNAGLGPEIGPVAGNGSSDGDTDIIPSTGWYSTDQYSLEVIFHNWMRRYECLTDDPAAA TAVYVPYYPALELHQHLCGFNTTVRDGPSEAFLRWLSSQPTWAALGGRDHFMVAAKTTWMFRREPGAGGGDEGCGNNFLGQPESRNMTVLTYESNIWAPR DIAVPYPSYFHPSSAGEVAAWQARARGAPRPFLFAFAGARRMKGQLAIRDRVFDVCDAAARRGRCGMLDCSHGLEGSITCRSPRKLVSLFTSARFCLQPR GDSFARRSSIDSV…
SbGT47_35	Sobic.008G138100.1	Chr8	49272267-49274437	transmembrane	MAGVQASAVLRAGRWLLPLTIPACCVVWMLLVFSPPTPELDAGHRQSFHVIVGETVAAIERRGTPPVLERVQESPPPAELLA RTKTPSSSPPPSPESEETIDTSPPSPERRPRAQPKQPLPPERERILDASSQPELAPVRQSRTGIPASPPPPQPSHQHLSRAQTKPAAVSDRCAGRYIYVQ DLPSRFNADLLRDCRSLSEWTDMCRHVANAGMGPRLTRTGGVLPPTGWYDTNQFTLEVIFHNRMRQYGCLTADASRASAVYVPYYAGLDVGRHLWGFSND VRDALAEDLVGWLRSSPAWAAHGGRDHFLVGGRIAWDLRREDGGEWGSRLLFLPEARNMTALVLESGPWHVGDVGVPYPTYFHPSRAAEVASWQRTLRRA RRPWLFAFVGARR…
SbGT47_36	Sobic.009G162700.1	Chr9	51981567-51983839	transmembrane	MKMRSIFAIAILAATTAVVLFHGSDAQELMQSHHTERISGSGGDVLEDDPVGKLKVFVYDLPAKYNTKPVEKDPRCLTHMFA TEIFVHRSLLSSAVRTLDPEEADWFYTPVYTTCDLTASGHPMPFDSPRMMRSAIRLIADRWPYWNRSEGADHFFVTPHDFGACFHFQEEKAMARGILPVL RRATLVQTFGQRNHVCLKDGGGSITIPPYAPPWKMEAQLLPPATPRSIFVYFRGLFYDAGNDPEGGYYARGARASVWENFKSNPLFDISTAHPTTYYQDM QRAVFCLCPLGWAPWSPRLVEAVVFGCIPVVIADDIVLPFADAIPWADIGVFVAEDDVPRLDTILTSIPVEVVLRKQRLLASPAMKRAVLFPQPAQPGDA FHQILNGLARKLP…
SbGT47_37	Sobic.009G220100.1	Chr9	56360605-56363786	transmembrane	MGTGSVRALALALAVFLACSGIAVVTAQETERIEGSAGDVLEDNPVGRLKVYVYDLPSKYNKKLLKKDPRCLNHMFAAEIFM HRFLLSSAVRTFNPEEADWFYTPVYTTCDLTPKGLPLPFKSPRMMRSAIQLIATNWPYWNRSEGADHFFVTPHDFGACFHYQEEKAIGRGILPLLQRATL VQTFGQKNHVCLKDGSITIPPYAPPQKMQTHLIPADTPRSIFVYFRGLFYDTGNDPEGGYYARGARASVWENFKNNPLFDISTDHPPTYYEDMQRSVFCL CPLGWAPWSPRLVEAVVFGCIPVIIADDIVLPFADAIPWEEIGVFVAEEDVPQLDSILTSIPTDVVLRKQRLLANPSMKQAMLFPQPAQPGDAFHQILNG LARKLPHGSNVFL…
SbGT47_38	Sobic.009G220200.1	Chr9	56365659-56369212	NO	MGRGSAMAQALALVALLLACSDVAVVAAQETERIQGSAGDVLEDDPVGRLKVYVYELPPKYNKNILAKDSRCLSHMFATEIF MHRFLLTSAVRTLNPDEADWFYTPVYTTCDLTPWGHPLTTKSPRMMRSAIQYISKRWPYWNRTEGADHFFVTPHDFGACFYFQEETAIQRGVLPVLRRAT LVQTFGQKHHVCLKEGSITIPPYAPPHKIRTHIVPPETPRSIFVYFRGLFYDTANDPEGGYYARGARASVWENFKNNALFDISTEHPPTYYEDMQRAIFC LCPLGWAPWSPRLVEAVVFGCIPVIIADDIVLPFADAIPWEEIAVFVAEDDVLKLDTILTSIPMEEILRKQRLLANPSMKQAMLFPQPAEPRDAFHQVLN GLARKLPHGKGVF…
SbGT47_39	Sobic.010G059400.1	Chr10	4640050-4642285	NO	MCRCSACRLGEREDIEREGSRSSRGRRRSSHGRGRGLMSRRRSGGCSGASVRAAFVILTVALSTVLGTCSVDDISSSNELFA SSSSSSPTASSRPARSEQLLLVSSSSLTTERSRRTPLKMSVEQELDAARAAIQRAARRRRRRRRVVDPAGRGSGNVTTADEWFEAGVDHALVASVYRNPA AFHRSYREMERRFKVYVYEEGEPPILHAGPCKDIYTIEGRFIEQLELMAPPPPAGGGGGARTSDPARAHAFFLPFSVSKMVQFAYRPDTYDKTPLRAIVA DYVRVVASRHPYWNRSAGADHFMLSCHDWGPEASRGHPELHANGIRALCNANTSEGFRPGQDVSVPEINLYTGDMPRQLLAPPAPPLASRPFLAFFAGGR HGHVRDLLLRRWK…
http://www.cbs.dtu.dk/services/TMHMM-2.0/
Pfam: PF03016

## Sheet: Arabidopsis thaliana
CAZy Family _Gene ID1	Model	Gene name	Chl	Chromosome position	Putitive function	Protein sequence
At1g21480	At1g21480.1		Chr1	7518946-7521504		MASLTSNKPRNFGAYSHYATPCTRTHQIGALFLVVSTFFVTRLFDQWFSESNSVTPVIDL RRTSSSYGIKTDNGIIRWPERGYGSHLSLKIYVYDENEIDGLKELLYGRDGSVKTTACLK GQWGSQVKIHKLLLESKFRTIKKDEADLFFVPAYVKCVRMLGGLNDKEINQTYVKVLSQM PYFRRSGGRDHIFVFPSGAGAHLFRSWSTFINRSIILTPEADRTDKKDTTAFNSWKDIII PGNVDDAMTKNGQPDVQPLPLSKRKYLANYLGRAQGKAGRLKLIDLSKQFPDKLECPDLK FSGTEKFGRTTYFEHLRNAKFCLAPRGESSWTLRFYESFFVECVPVLLSDHAELPFQNVI DYAQVSIKWPSTRIGSEFLDYLASISDRDIEGM…
GUT2	At1g27440.1	IRX10	Chr1	9529141-9531375	glucuronoxylan biosynthesis, secondary wall formation	MKIHSCLSAILLFLFFSASSAKQNVRTERISGSAGDVLEDDPVGKLKVYVYELPSKYNKK LLQKDPRCLTHMFAAEIFMHRFLLSSPVRTRNPDEADWFYTPIYPTCDLTPTGLPLPFKS PRMMRSSIQLISSNWPYWNRTEGADHFFVVPHDFGACFHYQEEKAIERGILPLLQRATLV QTFGQRNHVCLDEGSITIPPFAPPQKMQAHFIPPDIPRSIFVYFRGLFYDVNNDPEGGYY ARGARAAVWENFKNNPLFDISTDHPTTYYEDMQRAIFCLCPLGWAPWSPRLVEAVVFGCI PVIIADDIVLPFADAIPWEEIGVFVAEKDVPELDTILTSIPTEVILRKQRLLANPSMKRA MLFPQPAQPGDAFHQILNGLARKLPHDKSIYLK…
At1g34270	At1g34270.1		Chr1	12492411-12494544		MVPKIASMASTRPLCSIPSIFLSFSLLFVVSLLFFFSNSLISNPNPSISHNTLQNGINVY VAELPRSLNYGLIDKYWSSSTPDSRIPSDPDHPTRKTHSPDKYPPYPENPLIKQYSAEYW IMGDLETSPEKRIGSFAKRVFSESDADVVFVPFFATLSAEMELGNGKGSFRKKSGNEDYQ RQRQVLDFVKNTKAWKRSNGRDHVFVLTDPVAMWHVREEIALSILLVVDFGGWFRQDSKS SNGTSLPERIQHTQVSVIKDVIVPYTHLLPRLDLSQNQRRHSLLYFKGAKHRHRGGLIRE KLWDLLVNEPGVVMEEGFPNATGREQSIRGMRNSEFCLHPAGDTPTSCRLFDAIQSLCIP VIVSDTIELPFEGIIDYSEFSVFASVSDALTPK…
GT16	At1g63450.1	XUT1	Chr1	23531409-23534569	a xyloglucan-specific galacturonosyltransferase	MSLSKHLQKLVHKRESKKQPNKKMPVSVSKLRRPRTSKKTETGNPEKTLKDPRTCCNNLF SIFSARSFLYRVPLTILFLFLIYLWSTSTTVISGNVVHICISSRKLTDLYCLTAGSQPAL RAPVNNFTAPASEDVVTSKEEKNVFVLGKDGDKGFAENETFEGGKDSDKSTVGENLTINK NETFTGETSGERVSILNQDAKPIHEKNLDSVLDQDSLPKNEIDQDFIIDWDPETGEERYR YFKAKTEDEETGLKSTEEYIQIQRTWLSMGNNRKKPGSCEGKGVYVYDLPSKFNKDLLRE CSDMVPWADFCNYFKNDAFGELMESMGKGWFRTHQYSLEPIFHSRILKHPCRVHNETQAK LFYVPFYGGMDVLRWHFKNVSSDVKDVLPIEIV…
At1g67410	At1g67410.1		Chr1	25251193-25253667		MYGKTICTIVFFIFLVASFSIYMGTVDPRPYFYLLQSQPNGASSPCSSSGKPLRVFMYDL PRKFNIAMMDPHSSDVEPITGKNLPSWPQTSGIKRQHSVEYWLMASLLNGGEDENEAIRV FDPDLADVFYVPFFSSLSFNTHGKNMTDPDTEFDRLLQVELMEFLENSKYWNRSGGKDHV IPMTHPNAFRFLRQQVNASILIVVDFGRYSKDMARLSKDVVSPYVHVVESLNEEGDDGMG DPFEARTTLLYFRGNTVRKDEGKIRLRLEKLLAGNSDVHFEKSVATTQNIKVSTEGMRSS KFCLHPAGDTPSSCRLFDAIVSHCIPVIISDKIELPFEDEIDYSEFSLFFSIKESLEPGY ILNNLRQFPKEKWLEMWKRLKNVSHHFEFQYPP…
GT17	At1g68470.1		Chr1	25676395-25678288		MTFNKRQVKINHWPEKNDKEKQKYSKNRETVKLTLLTLLLLCSICFLFLTLNFPFTIEFT ASIPRTCDHNFTVYVYDLPKEFNIGLLQNCRHLNIYTNMCPHVANNGLGQPLHRGRTSWF STHQFIAEMIFHARVENHPCRTYEPDTADIFYVPFYGGLYASSVFREQNLTKRDELAVRL VNYISGQRWWKRSNGRDHFLAIGRTAWDFMRSSDTDFGANMLMQMPRVMNMSVLTVERQP WNGDNHFGIPYPSYFHPYTSAEMVTWQDKMKNVERPNLFSFVGGPRKGLEKAAIRDELIK QCAESSHCELLKCENGGSRCHNPMTVLGVMARSRFCLQAPGDSFTRRSTFDAMLAGCIPV FFSPHTMYTQYMWYLPDDKRSYSVFMDEKNNTH…
At1g74680	At1g74680.1		Chr1	28059188-28061119		MIKMSEKSLLSSKFLFYTITVSTLLFIVSSLVFLQRHDSSFTSSLVRKLILPRTDIKNEE FGLIDTKCDRDRDVLKVFMYDLPSEFHFGILNWHKKGSEIWPNVNNISTIPSYPGGLNRQ HSVEYWLTLDLLASETPEIKRPCSSAAIRVKNSNEADIVFVPFFASLSYNRKSKLRGNET SSDDRLLQERLVEFLKSQDEWKRFDGKDHLIVAHHPNSLLYARNFLGSAMFVLSDFGRYS SAIANLEKDIIAPYVHVVKTISNNESASFEKRPVLAYFQGAIYRKDGGTIRQELYNLLKD EKDVHFAFGTVRGNGTKQTGKGMASSKFCLNIAGDTPSSNRLFDAIVSHCVPVIISDQIE LPFEDTLDYSGFSVFVHASEAVKKEFLVNILRG…
MUR3	At2g20370.1	MUR3	Chr2	8791986-8794401	a xyloglucan galactosyltransferase, pectin biosynthesis	MFPRVSMRRRSAEVSPTEPMEKGNGKNQTNRICLLVALSLFFWALLLYFHFVVLGTSNID KQLQLQPSYAQSQPSSVSLRVDKFPIEPHAAPSKPPPKEPLVTIDKPILPPAPVANSSST FKPPRIVESGKKQEFSFIRALKTVDNKSDPCGGKYIYVHNLPSKFNEDMLRDCKKLSLWT NMCKFTTNAGLGPPLENVEGVFSDEGWYATNQFAVDVIFSNRMKQYKCLTNDSSLAAAIF VPFYAGFDIARYLWGYNISRRDAASLELVDWLMKRPEWDIMRGKDHFLVAGRITWDFRRL SEEETDWGNKLLFLPAAKNMSMLVVESSPWNANDFGIPYPTYFHPAKDSEVFEWQDRMRN LERKWLFSFAGAPRPDNPKSIRGQIIDQCRNSN…
At2g28110	At2g28110.1	IRX7/FRA8	Chr2	11977944-11979837	glucuronoxylan biosynthesis, secondary wall formation	MTTHKHRRTEKNLCFKQYYKWILCFILTLYFFASFFVDHDQDHRSSTSISKHLLTNHKPK LFASRAMFESKIHDHKLGFTSQQPNIKTDVFNNLKIYVYDLPSKFNKDWLANDRCTNHLF AAEVALHKAFLSLEGDVRTEDPYEADFFFVPVYVSCNFSTINGFPAIGHARSLINDAIKL VSTQYPFWNRTSGSDHVFTATHDFGSCFHTMEDRAIADGVPIFLRNSIILQTFGVTFNHP CQEVENVVIPPYISPESLHKTQKNIPVTKERDIWVFFRGKMELHPKNISGRFYSKRVRTN IWRSYGGDRRFYLQRQRFAGYQSEIARSVFCLCPLGWAPWSPRLVESVALGCVPVIIADG IRLPFPSTVRWPDISLTVAERDVGKLGDILEHV…
GT11	At2g29040.1		Chr2	12472425-12474962		MAMEKSSSKYRTQFWYVAMASFLLWLVLLYLFSSSAKTVHNHERLFRQENIIDLPVENVP QNHEPDEAPVVNVVSEDISVDNSSLPVSVDSPPDDQMSEDKKVVTDLVEELEKERVENEK KRVDSVVIGRSSKARRGHREPRKARSSGRLEAEKKRVRRNDADESNAENSDENHQALDKE PNFFEAKKDVEPKKALVDDNDDDLETKRGKELPNDSSSNVVEDDNDDDLETKKGKDNISK SEPKTQRNFVLNKNNTSKAKNRVISKRNQPSRVGKVMLRPRETRSNDPCKGKYVYMHEVP ALFNEELLKNCWTLSRWTDMCELTSNFGLGPRLPNMEGVSGWYATNQFTLEVIFHNRMKQ YKCLTKDSSLASAVYVPYYPGLDLMRFLWGPFP…
GT15	At2g31990.1		Chr2	13611351-13613573		MKNNNSSSVSIENHPWKKKPTTLLLFLSLLSISLLLLRLSQDKIILITTTKTTATTGTDH QRSHKSSEDDTCLGRYIYIHNLPSRFNLEIIKDCKSITRPKDKISMCKYLDNSGFGPLIG GKSSDYSPSWYATNQFMLEVIFHEKMKSYECLTRNSSLASAIYVPYYAGLDFRRHLRRRN VAARDAAGKELVKWLKKQPQWKDMSGKNHFLVTGRISRDFRRNSGSRSAWGTNFMLLSES LNLTFLSIERSLTSHNEFAIPYPTYFHPTSTPEILQWQEKIRLTNRTVLFSFAGAQRPSR NQNGVVRTEVIKQCKSSSKTCRFLDCDVNANSCDDPISLMKLFESSTFCLQPPGDSLTRK SVFDSILAGCIPVFFNQGSAYKQYLWHIPKNSS…
GT13	At2g32740.1	ATGT13	Chr2	13886826-13888232	galactosyl transferase	MDKFNPKKEKTVKKRALKVLTEISPTPLFSMLFLLHISQIATYLSLSDKETLNITVKTKQ GGTDTCAGRYVYMHNLPSRFNEDLIKSCEAYIELRNKCKYLINSGFGPRILEEDHNHTTR VLTIETGSWYYTNQFMLEVIFREKMRHYECLTNDSSLSSVVFVPFYAGFDVRRFWGYNVK LRDELGEDLAQWLRERPEWRKMYGRDHFFVTGRVGRDFRRVTDQDSDWGNKLMRLPEFEN ITMLSIETNSRSNEFAVPYPTYFHPKSRTEVKRWQRQVTMMQRRYLFSFVGANRPKMEES IRGEIIRQCLASQGRCKFLDCDTSSKDCSDPVKVVEVFQDSVFCLQPPGDTPTRRSTFDS ILAGCIPVFFSVDSVYNQYKWYFPKDRTKYSVY…
GT12	At2g32750.1		Chr2	13889641-13891170		MMKPVPKLWVVISSAFVFCLLVLFQINKSDLIEANLQITHQVNNFLISFVASSNNQILNH TKHANESDGIRAKQLEEEETDTCAGRYIYMYNLPSTFNDDIIKECRPLIKWFDMCPFMVN SGLGPQILVSDKTTARVLTVKTGSWYSTNQFLLSVIFRERMKHYECLTNNSSLASAIYVP YYAGFDVSRHLWGYNVTVRDELAIKLAQWLRERPEWGKMYGRDHFFVTGRIGWDFRRFHD EDSDWGSKLMLLPEFSNLTMLGIETTAWANEFAIPYPTYFHPKSLTEIWRWQKKVKSVKR KYLFSFVGGPRPKLDGSIRGEIIKQCLASHGKCNFLNCFVNDCDNPVKIMKVFENSVFCL QPSGDSYTRRSIFDSILAGCIPVFFSPGSGYNQ…
At2g35100	At2g35100.1	ARAD1	Chr2	14793651-14795629	a putative arabinosyltransferase	MARKSSLLKRAAIAVVSVIAIYVILNASVSRSLPSSSDLPRQLIREDDDDEGRAPIQPRV RVYMYNLPKRFTYGLIEQHSIARGGIKKPVGDVTTLKYPGHQHMHEWYLFSDLNQPEVDR SGSPIVRVSDPADADLFYVPVFSSLSLIVNAGRPVEAGSGYSDEKMQEGLVEWLEGQEWW RRNAGRDHVIPAGDPNALYRILDRVKNAVLLVSDFGRLRPDQGSFVKDVVIPYSHRVNLF NGEIGVEDRNTLLFFMGNRYRKDGGKVRDLLFQVLEKEDDVTIKHGTQSRENRRAATKGM HTSKFCLNPAGDTPSACRLFDSIVSLCVPLIVSDSIELPFEDVIDYRKFSIFVEANAALQ PGFLVQMLRKIKTKKILEYQREMKSVRRYFDYD…
At3g03650	At3g03650.1	EDA5	Chr3	884133-886410	embryo sac development	MGEKTNSRYLGVIITRKSIIFLFISIITVLSWFFIFSSTNPNRVLDHISVSESTDVPLII IKNSNSSPQNNAPKPQNREGAETEEPIKENRGGTKTESSMNQNRGETLRCIQRVSPSPRP LKVYMYDMSPEFHFGLLGWKPERNGVVWPDIRVNVPHHPGGLNLQHSVEYWLTLDLLFSE LPEDSRSSRAAIRVKNSSEADVVFVPFFSSLSYNRFSKVNQKQKKSQDKELQENVVKYVT SQKEWKTSGGKDHVIMAHHPNSMSTARHKLFPAMFVVADFGRYSPHVANVDKDIVAPYKH LVPSYVNDTSGFDGRPILLYFQGAIYRKAGGFVRQELYNLLKEEKDVHFSFGSVRNHGIS KAGEGMRSSKFCLNIAGDTPSSNRLFDAIASHC…
At3g07620	At3g07620.1		Chr3	2433267-2434988		MRDYIPKYLNAFLLAFATFAVGFAIFIAKDSNSSSHLYFSTSSSLWTSSFSPAFITVSIF LTVHRFREKRKRNGSNPGSGYWKRDGKVEAELATARVLIREAQLNYSSTTSSPLGDEDYV PHGDIYRNPYAFHRSYLLMEKMFKIYVYEEGDPPIFHYGLCKDIYSMEGLFLNFMENDVL KYRTRDPDKAHVYFLPFSVVMILHHLFDPVVRDKAVLERVIADYVQIISKKYPYWNTSDG FDHFMLSCHDWGHRATWYVKKLFFNSIRVLCNANISEYFNPEKDAPFPEINLLTGDINNL TGGLDPISRTTLAFFAGKSHGKIRPVLLNHWKEKDKDILVYENLPDGLDYTEMMRKSRFC ICPSGHEVASPRVPEAIYSGCVPVLISENYVLP…
At3g42180	At3g42180.1		Chr3	14324274-14328676		MSNNSSKSFCLLGFPLILILLLSFLLFSSFPNNESPPQQFFSSLTMSSLLVHTNALQSSS SSSSLYSPPITVKRRSNLEKREEELRKARAAIRRAVRFKNCTSNEEVITYIPTGQIYRNS FAFHQSHIEMMKTFKVWSYKEGEQPLVHDGPVNDIYGIEGQFIDELSYVMGGPSGRFRAS RPEEAHAFFLPFSVANIVHYVYQPITSPADFNRARLHRIFNDYVDVVAHKHPFWNQSNGA DHFMVSCHDWAPDVPDSKPEFFKNFMRGLCNANTSEGFRRNIDFSIPEINIPKRKLKPPF MGQNPENRTILAFFAGRAHGYIREVLFSHWKGKDKDVQVYDHLTKGQNYHELIGHSKFCL CPSGYEVASPREVEAIYSGCVPVVISDNYSLPF…
At3g45400	At3g45400.1		Chr3	16651963-16653678		MAMVEKNSSAIGYVARNLLLSLFVVTTILFALSCYFVLRSTAHNRFLSSTFPSKSFVDVR PEKANCRCVKDEKSSVIAGPLKVYMYNMDPEFHFGLLDWKKKEGSDSSVWPDIQKYIPPY PGGLNLQHSIEYWLTLDLLASEYENAPRSVAAKRVYNSSEADVIFVPFFSSLSYNRFSKV NPHQKTSRNKDLQGKLVTFLTAQEEWKRSGGRDHVVLAHHPNSMLDARNKLFPAMFILSD FGRYPPTVANVEKDVIAPYKHVIKAYENDTSGFDSRPILLYFQGAIYRKDGGFVRQELFY LLQDEKDVHFSFGSVRNGGINKASQGMHNSKFCLNIAGDTPSSNRLFDAIASHCVPVIIS DDIELPFEDVIDYSEFSVFVRTSDALKENFLVN…
At3g57630	At3g57630.1		Chr3	21339302-21343796		MFSHQKWKFSWSQIATVASVIVLVSLVHLFLGPVVPSFDSITVRQAQNLCGPSNESISQV TKNSSQSLVVVAFDRRFPADSHGAVVYRNASWKAEIGQWLSSCDAVAKEVDIIEPIGGRK CMSDCSGQGVCNHEFGLCRCFHGFTGEDCSQKLRLDCNYEKTPEMPYGKWVVSICSRHCD TTRAMCFCGEGTKYPNRPVPESCGFQINSPTNPDEPKMTDWSKPDLDILTTNSSKQGWCN VDPEDAYAMKVKIKEECDCKYDCLWGRFCEIPVQCTCVNQCSGHGKCRGGFCQCDKGWFG TDCSIPSTLSTVGEWPQWLRPAHLEVPSEKNVPGNLINLSAVVKKKRPLIYIYDLPPDFN SLLIEGRHFKFECVNRIYDERNATVWTDYLYGS…
GT14	At4g13990.1		Chr4	8084395-8086095		MRPKNYSQMEKPISITTGKFRTNNNNNHNNVWFVVPLFFILCFVLLCFDYSALFTDTDET AFSIPDVTQKSTSSEFTKDDNFSRFPDDPSPDSSCSGRYIYVHELPYRFNGDLLDNCFKI TRGTEKDICPYIENYGFGPVIKNYENVLLKQSWFTTNQFMLEVIFHNKMINYRCLTNDSS LASAVFVPFYAGLDMSRYLWGFNITVRDSSSHELMDWLVVQKEWGRMSGRDHFLVSGRIA WDFRRQTDNESDWGSKLRFLPESRNMSMLSIESSSWKNDYAIPYPTCFHPRSVDEIVEWQ ELMRSRKREYLFTFAGAPRPEYKDSVRGKIIDECLESKKQCYLLDCNYGNVNCDNPVNVM KVFRNSVFCLQPPGDSYTRRSMFDSILAGCIPV…
At4g16745	At4g16745.2		Chr4	9411840-9414897		MVNIKSPLRLFIEESIKELIRGFRRQRIKWRNAFLLGSIMTTIVVLLHTPTFSVFSDEEE TESSSSSPIYLNGSLHLNIHIVSSEAKVENFHTLRTRTPIVQLNASEASEAVLSRKRRKR KKRKKTKDDLILTDPPPAPRHVLSSSERRALSLPPKKALTYAKLEIQRAPEVINDTDLFA PLFRNLSVFKRSYELMELILKVYIYPDGDKPIFHEPHLNGIYASEGWFMKLMESNKQFVT KNPERAHLFYMPYSVKQLQKSIFVPGSHNIKPLSIFLRDYVNMLSIKYPFWNRTHGSDHF LVACHDWGPYTVNEHPELKRNAIKALCNADLSDGIFVPGKDVSLPETSIRNAGRPLRNIG NGNRVSQRPILAFFAGNLHGRVRPKLLKHWRNK…
GT19	At4g22580.1		Chr4	11889098-11890725		MASKSTVTTLTIFFFFFFFFIEPKVQSQQISAVDSECTNRWIHIRTLPSRFNLDLLSTCN RYPITDDLCPYLANHGLGPKTHTRTRSWYRTDPLLLELIFHRRILEYPCLTPDPNLASAI YLPYYAGIDSLRYLYGPDLNSSADHGSDLLEFLTRDQPEIWSRRSGHDHFLVMARPAWDF SQPLTVDPPIWGTSFLERREFFNLTALTLESRYWPWQEQAVPYPTSFHPHSLPFLESWIR RVRRSRRTSLMLFAGGGGTSSSPNIRRSIRLECTSINATQSDNKICDFVDCSNGICEHDP IRFMRPMLQSSFCLQPPGDTPTRKATFDGIIAGCIPVFFEDQTAKMQYKWHLPESEFAEF SVTIPKEDVVFRGVRIQDVLMSIPKEEVTRMRE…
At4g32790	At4g32790.1		Chr4	15812095-15814987		MLNLWLREHLVYVCHQQNLVAKFRSQKAMKLLRFAGLVFIFITTFQFVNIRYYGGDIFSL SSQDKFPVSIDVSTEPVSTLSGPERLNSSSSRSVEVDEEESTGLKEDHVIGFDKNDTVQG HDSFVEDVKDKETLDLLPGTKSSSNESYEKIVEDADIAFENIRKMEILESKSDPSVDNLS SEVKKFMNVSNSGVVSITEMMNLLHQSRTSHVSLKVKRSSTIDHELLYARTQIENPPLIE NDPLLHTPLYWNLSMFKRSYELMEKKLKVYVYREGKRPVLHKPVLKGIYASEGWFMKQLK SSRTFVTKDPRKAHLFYLPFSSKMLEETLYVPGSHSDKNLIQFLKNYLDMISSKYSFWNK TGGSDHFLVACHDWAPSETRQYMAKCIRALCNS…
At4g38040	At4g38040.1		Chr4	17867438-17869302		MTIVKPSQFSFSGGGSSPLCSLKSSLLTVAILTFISLFYLSLNSLRTSPPSPVIVVTPIH VPHTFVNEYKTDNETPTMEEETYSDVYHSPEAFRLNYAEMEKRFKVYIYPDGDPNTFYQT PRKVTGKYASEGYFFQNIRESRFRTLDPDEADLFFIPISCHKMRGKGTSYENMTVIVQNY VDGLIAKYPYWNRTLGADHFFVTCHDVGVRAFEGSPLLIKNTIRVVCSPSYNVGFIPHKD VALPQVLQPFALPAGGNDVENRTTLGFWAGHRNSKIRVILAHVWENDTELDISNNRINRA TGHLVYQKRFYRTKFCICPGGSQVNSARITDSIHYGCIPVILSDYYDLPFNDILNWRKFA VVLREQDVYNLKQILKNIPHSEFVSLHNNLVKV…
At5g03795	At5g03795.1		Chr5	1007390-1010473		MGDEDVDGKCKNMSACSSTTSYSTKLFLFMVPLVVISGFVFVNIGPKDSTSLLTSLSTTT SHLPPPFLSTAPAPAPSPLLPEILPSLPASSLSTKVESIQGDYNRTIQLNMINVTATSNN VSSTASLEPKKRRVLSNLEKIEFKLQKARASIKAASMDDPVDDPDYVPLGPMYWNAKVFH RSYLEMEKQFKIYVYKEGEPPLFHDGPCKSIYSMEGSFIYEIETDTRFRTNNPDKAHVFY LPFSVVKMVRYVYERNSRDFSPIRNTVKDYINLVGDKYPYWNRSIGADHFILSCHDWGPE ASFSHPHLGHNSIRALCNANTSERFKPRKDVSIPEINLRTGSLTGLVGGPSPSSRPILAF FAGGVHGPVRPVLLQHWENKDNDIRVHKYLPRG…
At5g11130	At5g11130.1		Chr5	3542320-3544724		MADLTCTTPFLLYPSLVIILFFYSINHHNQIFSSVVDDDPSCRLSSSPQAVFSSFRIFPF RSSSSCLNITSNNNSTSEVVVVEEVDEAVERIEEGLAMARAAIRKAGEKNLRRDRDRTNN SDVGVVSNGSVYLNAFTFHQSHKEMEKRFKIWTYREGEAPLFHKGPLNNIYAIEGQFMDE IENGNSRFKAASPEEATVFYIPVGIVNIIRFVYRPYTSYARDRLQNIVKDYISLISNRYP YWNRSRGADHFFLSCHDWAPDVSAVDPELYKHFIRALCNANSSEGFTPMRDVSLPEINIP HSQLGFVHTGEPPQNRKLLAFFAGGSHGDVRKILFQHWKEKDKDVLVYENLPKTMNYTKM MDKAKFCLCPSGWEVASPRIVESLYSGCVPVII…
At5g11610	At5g11610.1		Chr5	3735440-3738217		MDQSRVLRFIGQVETCRVVLLMVLVVAFVSGLQYFELSPVLLSIVSPGNSTISEFRKSND TTKSAENETFLASQEASTGLKPYNRTTEVLKSSEHKFLNDSHKIEASGQRRRSNETASSL HPLQPKIPQIRKKYPHRSITKPPSIVISIKQMNNMILKRHNDPKNSLAPLWGSKVDQELK TARDKIKKAALVKKDDTLYAPLYHNISIFKRSYELMEQTLKVYVYSEGDRPIFHQPEAIM EGIYASEGWFMKLMESSHRFLTKDPTKAHLFYIPFSSRILQQKLYVHDSHSRNNLVKYLG NYIDLIASNYPSWNRTCGSDHFFTACHDWAPTETRGPYINCIRALCNADVGIDFVVGKDV SLPETKVSSLQNPNGKIGGSRPSKRTILAFFAG…
At5g16890	At5g16890.1		Chr5	5551629-5554917		MSGKQQNHRSTSSRPRSKTLILIGSLFTVSLLVILYTSSSSSRASISNPNPSDRPETSFV TSLEHFLIYKAPKLSLPVRDDTVRGESDDDVRKLDEMVFERENRWLNEDPGYPVEFPIKV YVYEMPKKFTFDLLWLFHNTYKETSNATSNGSPVHRLIEQHSIDYWLWADLISPESERRL KSVVRVQKQQDADFFYVPFFTTISFFLLEKQQCKALYREALKWVTDQPAWKRSEGRDHIF PIHHPWSFKSVRKFVKNAIWLLPDMDSTGNWYKPGQVSLEKDLILPYVPNVDICDTKCLS ESAPMRTTLLFFRGRLKRNAGGKIRAKLGAELSGIKDIIISEGTAGEGGKLAAQRGMRRS LFCLCPAGDTPSSARLFDAIVSGCIPVIVSDEL…
At5g19670	At5g19670.1		Chr5	6646719-6649498		MEVRSELRKQSRSGKRKWAILVGIVALTHILLLLSYGDALRYLLPDGRRLKLPNENNALL MTPSRNTLAVNVSEDSAVSGIHVLEKNGYVSGFGLRNESEDDEGFVGNVDFESFEDVKDS IIIKEVAGSSDNLFPSETTVMQKESVSTSNNGYQVQNVTVQSQKNVKSSILSGGSSIASP ASGNSSLLVSKKVSKKKKMRCDLPPKSVTTIDEMNRILARHRRTSRAMRPRWSSRRDEEI LTARKEIENAPVAKLERELYPPIFRNVSLFKRSYELMERILKVYVYKEGNRPIFHTPILK GLYASEGWFMKLMEGNKQYTVKDPRKAHLYYMPFSARMLEYTLYVRNSHNRTNLRQFLKE YTEHISSKYPFFNRTDGADHFLVACHDWAPYET…
At5g20260	At5g20260.1		Chr5	6836806-6839532		MKLSLVPTLLLLLVLLVFYQHHSSPNLNSNALSSFVDATSLAPSPSPSLSMEFSVASSNL STISSPPENKGNKRNIIEEGLAKSRSAIREAVRLKKFVSDKEETFVPRGAVYRNAFAFHQ SHIEMEKKFKVWVYREGETPLVHMGPMNNIYSIEGQFMDEIETGMSPFAANNPEEAHAFL LPVSVANIVHYLYRPLVTYSREQLHKVFLDYVDVVAHKYPYWNRSLGADHFYVSCHDWAP DVSGSNPELMKNLIRVLCNANTSEGFMPQRDVSIPEINIPGGHLGPPRLSRSSGHDRPIL AFFAGGSHGYIRRILLQHWKDKDEEVQVHEYLAKNKDYFKLMATARFCLCPSGYEVASPR VVAAINLGCVPVIISDHYALPFSDVLDWTKFTI…
At5g22940	At5g22940.1	F8H	Chr5	7676938-7679179	glucuronoxylan biosynthesis, secondary wall formation	MSLDIKKPNITKTKKKKTGFVVKMQLNNNRGGNKRNIFIFFFFRNYYTWILWFCLSLYFF TSYFSVEDQSSPSSIRLLSNHKTSSSLPSRALIESSAIKTTSIGLFTGMKIYVYDLPASY NDDWVTASDRCASHLFAAEVAIHRALLSSDVRTLDPDEADYFFVPVYVSCNFSTSNGFPS LSHARSLLSSAVDFLSDHYPFWNRSQGSDHVFVASHDFGACFHAMEDMAIEEGIPKFMKR SIILQTFGVKYKHPCQEVEHVVIPPYIPPESVQKAIEKAPVNGRRDIWAFFRGKMEVNPK NISGRFYSKGVRTAILKKFGGRRRFYLNRHRFAGYRSEIVRSVFCLCPLGWAPWSPRLVE SAVLGCVPVVIADGIQLPFSETVQWPEISLTVA…
At5g25310	At5g25310.1		Chr5	8784820-8787366		MDKFQSKFTRFGFISICFGSIALVLLISHCSTSFFDYSFQKFKFSFPEETELRRNVYTSS SGEENRVVVDSRHVSQQILTVRSTNSTLQSKPEKLNRRNLVEQGLAKARASILEASSNVN TTLFKSDLPNSEIYRNPSALYRSYLEMEKRFKVYVYEEGEPPLVHDGPCKSVYAVEGRFI TEMEKRRTKFRTYDPNQAYVYFLPFSVTWLVRYLYEGNSDAKPLKTFVSDYIRLVSTNHP FWNRTNGADHFMLTCHDWGPLTSQANRDLFNTSIRVMCNANSSEGFNPTKDVTLPEIKLY GGEVDHKLRLSKTLSASPRPYLGFFAGGVHGPVRPILLKHWKQRDLDMPVYEYLPKHLNY YDFMRSSKFCFCPSGYEVASPRVIEAIYSECIP…
At5g25820	At5g25820.1		Chr5	8997183-9000329		MRRESPWLWKVESRRLLWLLGLTFALIVTFQYIELPYAISSIFSSTKIPISRNSTSLIGN STSAIAPSPAGDEEEVEVDQIYDSSGNATAPAISPTTATLPPLLPILKENATAPTANAKA PGLNPSLVKDHATAPSPSANPPAALPGLNPSLVKENATAPAPSVKSPVALPILNPSTVKE NATAPVASAKAPVALPSINPSPVMKNETLPTTSKVPERNPTKKNVGDASPIVRFVPDVKE NAKMPGFGVMSISEMSKQLRQNRISHNRLAKKPKWVTKPDLELLQAKYDIENAPIDDKDP FLYAPLYRNVSMFKRSYELMEKILKVYAYKEGNKPIMHSPILRGIYASEGWFMNIIESNN NKFVTKDPAKAHLFYLPFSSRMLEVTLYVQDSH…
At5g33290	At5g33290.1	XGD1	Chr5	12558256-12562020	a xylogalacturonan xylosyltransferase, pectin biosynthesis	MAAPRSRRCSLSLLTLFSITLILISVSLFVSTKPANKPFLDYRNQFSISISISSPLEQNT TNTSFVSASPPLSPLGQSNTTNTILASSSSSSSFSDHQNQNKSPSPTSKKIVIRKRSGLD KIESDLAKARAAIKKAASTQNYVSSLYKNPAAFHQSHTEMMNRFKVWTYTEGEVPLFHDG PVNDIYGIEGQFMDEMCVDGPKSRSRFRADRPENAHVFFIPFSVAKVIHFVYKPITSVEG FSRARLHRLIEDYVDVVATKHPYWNRSQGGDHFMVSCHDWAPDVIDGNPKLFEKFIRGLC NANTSEGFRPNVDVSIPEIYLPKGKLGPSFLGKSPRVRSILAFFAGRSHGEIRKILFQHW KEMDNEVQVYDRLPPGKDYTKTMGMSKFCLCPS…
At5g37000	At5g37000.1		Chr5	14618107-14620282		MRIITRFHHSDIRRLLLGIIVIAGFVVLLVQCFGIPCRNSFCLSPIKVSVIELTNSNVTQ VSVMNYTNLSDDDDEELENKKEDLDSENDVVISKEKVEMNVSFIAIGNISLRNPKMVVVS SESESDPNSVMIRVKDSRKGNVLSLRRHKQGSAISISQMNSLLIQSLSSFKSPKPRWSSA RDSEMLSARSEIEKVSLVHDFLGLNPLVYRNISKFLRSGDMSRFSMCCLFRSYDLMERKL KIYVYKEGGKPIFHTPMPRGIYASEGWFMKLMESNKKFVVKDPRKAHLFYIPISIKALRS SLGLDFQTPKSLADHLKEYVDLIAGKYKFWNRTGGADHFLVACHDWGNKLTTKTMKNSVR SLCNSNVAQGFRIGTDTALPVTYIRSSEAPLEY…
GT20	At5g41250.1		Chr5	16501217-16502902		MVSKRKSRTSKTIEDSCIHLCSVFFRFLYYTLPALFLFFFLLYLCLSFTTGISYNNFHMC IFSRKFNDPYCNTAGSKPGFQIISEENVTFAGEIAGDRVSKDHNKILNSVPVQEHKTKNK VDLNSLIELKAEEEYSKYIKPTSEDEGYALRAAIKYLYLQRSWLSPGDENLNKPRSCEGK GVYVYDLPSKFNSDLLVGCNDILPGVNLCSYFKNEGFGEAIKNLGKGWFATHMYSLEPIL HSRVLKHPCRVYNETQAKLFFVPYYGGYDVLRWHYRNVSEDVKDRLGIEVLKWLNSKESW RRNAGKDHVFVLGKITWDFRRDKDPWGSRFLELQEMQNPTKLLIERQPWQVNDIAIPHPT YFHPRTDDDITRWQIKIMSKLRRNLVSFAGGAR…
At5g44930	At5g44930.1	ARAD2	Chr5	18138775-18142147	a putative arabinosyltransferase	MNPKIRKPNNSSSKKVTVSVLSVFLVFVFVNTFFYPSFYSDSGSIRRNLVDSRESFHFPG NFRKTKVYMYELPTNFTYGVIEQHGGEKSDDVTGLKYPGHQHMHEWYLYSDLTRPEVKRV GSPIVRVFDPAEADLFYVSAFSSLSLIVDSGRPGFGYSDEEMQESLVSWLESQEWWRRNN GRDHVIVAGDPNALKRVMDRVKNAVLLVTDFDRLRADQGSLVKDVIIPYSHRIDAYEGEL GVKQRTNLLFFMGNRYRKDGGKVRDLLFKLLEKEEDVVIKRGTQSRENMRAVKQGMHTSK FCLHLAGDTSSACRLFDAIASLCVPVIVSDGIELPFEDVIDYRKFSIFLRRDAALKPGFV VKKLRKVKPGKILKYQKVMKEVRRYFDYTHLNG…
GUT1	At5g61840.1	IRX10-L	Chr5	24839178-24841940	glucuronoxylan biosynthesis, secondary wall formation	MKLSSCVLIFLLCNTFSSISAFRLSRSQPTERISGSAGDVLEDDPVGRLKVFVYELPSKY NKKILQKDPRCLNHMFAAEIYMQRFLLSSPVRTLNPEEADWFYVPVYTTCDLTPNGLPLP FKSPRMMRSAIQLIASNWPYWNRTEGADHFFVVPHDFGACFHYQEEKAIGRGILPLLQRA TLVQTFGQRNHVCLKEGSITVPPYAPPQKMQSHLIPEKTPRSIFVYFRGLFYDVGNDPEG GYYARGARAAVWENFKDNPLFDISTEHPTTYYEDMQRAIFCLCPLGWAPWSPRLVEAVIF GCIPVIIADDIVLPFADAIPWEDIGVFVDEKDVPYLDTILTSIPPEVILRKQRLLANPSM KQAMLFPQPAQPGDAFHQVLNGLARKLPHERSV…
GT18	At5g62220.1	XLT2	Chr5	24988456-24990009	a Golgi apparatus-localized galactosyltransferase	MLPVSNPSSPEHLLKKSRTPDSTTSIDRKNSFNSLHSVGNRSSYIAASRSHCTWLILSLL SLQLILFLTLRSIPFPHRHIPENFPSPAAVVTTTVTTTVISAASSNPPLSSSSSDERCDS GRVFVYDMPKIFNEVILQQCDNLNPWSSRCDALSNDGFGQEATSLSNVIPKDLVQSWFWT DQFVTEIIFHNRILNHRCRTLDPESATAFYIPFYAGLAVGQYLWSNYAAADRDRHCKMMT QWVKNQPYWNRSNGWDHFITMGRITWDFRRSKDEDWGSNCIYIPGMRNITRLLIERNSWD HFDVGVPYPTGFHPRSDSDVVNWQDFVRNRRRETLFCFAGAPRAGIVNDFRGLLLRHCEE SRGKCRTVDCTVGKCSNGSSAILETFLGSDFCL…

## Sheet: Oryza sativa Japonica 
CAZy Family _Gene ID1	Model	Gene name	Chl	Chromosome position	Protein sequence
OsGT47_1	LOC_Os01g01780.1		Chr1	412579-415830	MPSPLPCNLLTRRRALTACAAVAALTAAAALFLLATPPTEDPTHPYLLASLLHNNTSNQP DSAAASQPPLPSTSILQLQTNLPSGFTTVPSMFLVPSPSPAENLDDGSMEETDPPDLKEN PPAESAPFLQEPISSGSPIRRSDIYNKGHDMKDHAMLPPRPEVPIPLWSTAADEELIYAK KEITIAPLVSNDPDLHAPLFRNVSVFRRSYELMERLLKVFVYHDGAKPIFHSPELKGIYA SEGWFMKLMEGNQHFVVRDPNRAHLFYLPYSSRQLEHNLYVPGSNTIEPLSIFVKKYIDF ISTKFPYWNRTKGADHFFVACHDWGPYTTKLHDELRKNTIKALCNADLSEGVFIHGRDVS LPETFLRSPRRPLRGIGGKPAAERSILAFFAGQ…
OsGT47_2	LOC_Os01g45350.1		Chr1	25745252-25747963	MAPEEALRYAKKEIMAAGPVIDDPDLYAPLFKNVSQFKRSYELMERILKVYIYQDGRRPI FHTPPLSGIYASEGWFMKLLKESRRFAVTDPAKAHLFYLPYSSQQLRISLYVPDSHNLRP LAAYLRDFVKGLAAKYPFWNRTRGADHFLVACHDWGSYTTTAHGDLRRNTVKALCNADSS EGIFTPGRDVSLPETTIRTPRRPLRYVGGLPVSRRGILAFFAGNVHGRVRPVLLKHWGDG RDDDMRVYGPLPARVSRRMSYIQHMKNSRFCLCPMGYEVNSPRIVEALYYECVPVIIADN FVLPLSDVLDWSAFAVVVAEKDVPDLKKILQGITLRKYVAMHGCVKRLQRHFLWHARPLR YDLFHMILHSIWLSRVNQIELHE*
OsGT47_3	LOC_Os01g59630.1		Chr1	34485206-34489811	MAGKQLPSSLARARAASPRGLLAAAALLLLLLLAASYSLLLSPSSPGGLASPSSGPGSAA DTAFLASLDRFLASPRRSAAPAAAPGDLDAAIRAEEEERLYGGGAWPAAPAPLRVYVYEM PSRFTYDLLRLFRDSYRETSNLTSNGSPVHRLVEQHSIDYWLWADLIAPESQRLLKNVIR VRRQEEADIFYVPFFTTISYFLLEKQECKALYREALKWVTDQPAWQRSEGRDHVIPVHHP WSFKSVRRFVKKAIWLLPDMDSTGNWYKPGQVYLEKDVILPYVPNVDLCDSKCVSETQSR RSTLLFFRGRLRRNAGGKIRSKLVTELKDAEGIIIEEGTAGADGKAAAQNGMRKSLFCLN PAGDTPSSARLFDAIVSGCIPVIVSDELELPFE…
OsGT47_4	LOC_Os01g69220.1		Chr1	40230199-40233220	MASPSSRAVAVGGALLLLLVFAVPTTFLYLTSAPAASSPSLLLNLKPFGARCAPAAAAAP PLRVFMYDLPRRFHVGMMDASASGFPAWPPSAGGIRRQHSVEYWMMASLQGGGGGGNGSS SEEGREAVRVTDPDAAEAFFVPFFSSLSFNVHGRNMTDPETEADRLLQVELMEILWKSKY WQRSAGRDHVIPMHHPNAFRFLRDMVNASILIVADFGRYTKELASLRKDVVAPYVHVVDS FLNDDPPDPFDDRPTLLFFRGRTVRKDEGKIRAKLAKILKGKDGVRFEDSLATGEGIKTS TEGMRSSKFCLHPAGDTPSSCRLFDAIVSHCVPVIVSSRIELPFEDEIDYSEFSLFFSVE EALRPDYLLNQLRQIQKTKWVEIWSKLKNVSHH…
OsGT47_5	LOC_Os01g70180.1		Chr1	40615700-40619637	MGTRPCAGVASAVAAAVAVLLLAVSCFAAAATTTQKHGRMSGKGGDVLEDDPTGKLKVFV YEMPRKYNLNLLAKDSRCLQHMFAAEIFMHQFLLSSPVRTLDPEEADWFYTPAYTTCDLT PQGFPLPFRAPRIMRSAVRYVAATWPYWNRTDGADHFFLAPHDFGACFHYQEERAIERGI LPVLRRATLVQTFGQRHHPCLQPGSITVPPYADPRKMEAHRISPATPRSIFVYFRGLFYD MGNDPEGGYYARGARASVWENFKDNPLFDISTEHPATYYEDMQRAIFCLCPLGWAPWSPR LVEAVVFGCIPVIIADDIVLPFADAIPWGEISVFVAEEDVPRLDTILASVPLDEVIRKQR LLASPAMKQAVLFHQPARPGDAFHQILNGLARK…
OsGT47_6	LOC_Os01g70190.1		Chr1	40626011-40629506	MAMRLSSAAVALALLLAATALEDVARGQDTERIEGSAGDVLEDDPVGRLKVYVYELPTKY NKKMVAKDSRCLSHMFAAEIFMHRFLLSSAIRTLNPEEADWFYTPVYTTCDLTPWGHPLP FKSPRIMRSAIQFISSHWPYWNRTDGADHFFVVPHDFGACFHYQEEKAIERGILPLLRRA TLVQTFGQKDHVCLKEGSITIPPYAPPQKMKTHLVPPETPRSIFVYFRGLFYDTANDPEG GYYARGARASVWENFKNNPLFDISTDHPPTYYEDMQRSIFCLCPLGWAPWSPRLVEAVVF GCIPVIIADDIVLPFADAIPWDEIGVFVAEDDVPKLDTILTSIPMDVILRKQRLLANPSM KQAMLFPQPAQPGDAFHQILNGLGRKLPHPKSV…
OsGT47_7	LOC_Os01g70200.1		Chr1	40633090-40636112	MRRWVLAIAILAAAVCFFLGAQAQEVRQGHQTERISGSAGDVLEDDPVGRLKVYVYDLPS KYNKKLLKKDPRCLNHMFAAEIFMHRFLLSSAVRTFNPEEADWFYTPVYTTCDLTPSGLP LPFKSPRMMRSAIELIATNWPYWNRSEGADHFFVTPHDFGACFHYQEEKAIGRGILPLLQ RATLVQTFGQKNHVCLKDGSITIPPYAPPQKMQAHLIPPDTPRSIFVYFRGLFYDTSNDP EGGYYARGARASVWENFKNNPLFDISTDHPPTYYEDMQRSVFCLCPLGWAPWSPRLVEAV VFGCIPVIIADDIVLPFADAIPWEEIGVFVAEEDVPKLDSILTSIPTDVILRKQRLLANP SMKQAMLFPQPAQAGDAFHQILNGLARKLPHGE…
OsGT47_8	LOC_Os02g09430.1		Chr2	4838492-4841905	MAGRLPGAASAAAAPLPRALLLLAALALFSLTFLSLRSLRPAAAPPSLAIGGSRPSSFAR PSVYHSAEAFAAGYAEMERSFKVYMYPDGDPKTFYQTPRKLTGKYASEGYFFQNIRESRF RTGDPDKAHLFFVPISPHKMRGKGTSYENMTIIVKDYVEGLINKYPYWNRTLGADHFFVT CHDVGVRAFEGLPFMVKNSIRVVCSPSYNVDFIPHKDIALPQVLQPFALPEGGNDVENRT ILGFWAGHRNSKIRVILAQVWENDTELAISNNRISRAIGELVYQKQFYHTKFCICPGGSQ VNSARISDSIHYGCVPVILSDYYDLPFNDILDWRKFAVVLKERDVYQLKSILKSISQEEF VELHKSLVQVQKHFVWHSPPLPYDAFHMVMYEL…
OsGT47_9	LOC_Os02g32110.1		Chr2	18972815-18976369	MVGARAGRVPAAAAAAAAVLIVAACVFSSLAGAAAAAEVVGGAAQGNTERISGSAGDVLE DNPVGRLKVFVYDLPSKYNKRIVAKDPRCLNHMFAAEIFMHRFLLSSAVRTLNPEQADWF YAPVYTTCDLTHAGLPLPFKSPRMMRSAIQFLSRKWPFWNRTDGADHFFVVPHDFGACFH YQEEKAIERGILPLLRRATLVQTFGQKNHVCLKEGSITIPPYAPPQKMQAHLIPPDTPRS IFVYFRGLFYDNGNDPEGGYYARGARASLWENFKNNPLFDISTEHPATYYEDMQRSVFCL CPLGWAPWSPRLVEAVVFGCIPVIIADDIVLPFADAIPWDEIGVFVDEEDVPRLDSILTS IPIDDILRKQRLLANPSMKQAMLFPQPAQPRDA…
OsGT47_10	LOC_Os02g39960.1		Chr2	24163553-24165653	MEQSGRVAVPLTALALLAVVAAGVALPPAPSSGTGIQDGRGSEHSLRHVPDEPQKAPPTS VHARPINKKVTRGKIEAGLARSRAAIRRAARATPPSDESIRRRGSASTVVAAAGDDDYVP RGAIYRNARAFHRSYVEMERRFKIWTYREGEPPVAHIGPGTDIYSIEGQFMYEMDDPRSR FAARRPDDAHAFLLPISVCNLVHYVYRLNATGDLAPLRGLVADYVRVVAERYPYWNRSRG ADHVIVSCHDWAPMVTSAHRQLYGNAIRVLCNANTSEGFRPRKDATLPEVNLADGVLRRP TAGLPPENRTTLAFFAGGRHGHIRESLLRHWLIGNKGGAAADGDGDGDMRVHEYLPAGED YHAQMAAARFCLCPSGFEVASPRVVESVFAGCV…
OsGT47_11	LOC_Os03g01760.1		Chr3	479167-482008	MAMAMRGDPKQRRASASAPHGGAAHHVADKLRRHSTFLLLLLLLWFALSLYLFLSATPPP PRPAFLPSTSTPRPALRIYVYDLPARFNRHWVAADARCATHLFAAEVALHEALLAYAGRA ARPDDATLFFVPVYVSCNFSTDNGFPSLSHARALLADAVDLVRAQMPYWNRSAGADHVFV ASHDFGACFHPMEDVAIADGIPEFLKRSILLQTFGVQGTHVCQEADHVVIPPHVPPEVAL ELPEPEKAQRDIFAFFRGKMEVHPKNISGRFYSKKVRTELLQKYGRNRKFYLKRKRYGNY RSEMARSLFCLCPLGWAPWSPRLVESVLLGCIPVIIADDIRLPFPSVLQWLDISLQVAEK DVASLEMVLDHVVATNLTVIQKNLWDPVKRKAL…
OsGT47_12	LOC_Os03g05060.1		Chr3	2466458-2468340	MRFSVVISSWILNRQLIKSAPKGGGRQQRRAKGMEKVAVGLLPPLRFIAVLAVVSWTSFI YCHFSLLSGGLLLGHGGGDDGADPCRGRYIYVHDLPRRFNDDILRDCRKTRDHWPDMCGF VSNAGLGRPLVDRADGVLTGEAGWYGTHQFALDAIFHNRMKQYECLTNQSAVADAVFVPF YAGFDFVRYHWGYDNATRDAASVDLTQWLMRRPEWRRMGGRDHFLVAGRTGWDFRRDTNI NPNWGTNLLVMPGGRDMSVLVLESSLLNGSDYAVPYPTYFHPRSDADVFRWQDRVRGMQR RWLMAFVGAPRPDDPKNIRAQIIAQCNATSACSQLGCAFGSSQCHSPGNIMRLFQKATFC LQPPGDSYTRRSVFDSMVAGCIPVFFHNATAYL…
OsGT47_13	LOC_Os03g05070.1		Chr3	2471160-2473026	MERTGAHGGKRLLPRLLFLAALSVTPWLLIFCLHFSVFDGAPPVSSPAARQSLVAVVSEG GEDSQRFLLEQEEQLRRLPSARDVTTTTAAAVAGDAHACEGRYVYIHDLPPRFNDDILRN CREWYQWINMCVYLSNGGLGEPVDNADGAFADEGWYATDHFGLDVIFHSRIKQYECLTDD SSRAAAVFVPFYAGFDVVQHLWGSNASVKDAASLELVDWLTRRPEWRSMGGRDHFVMSGR TAWDHQRQTDSDSEWGNKFLRLPAVQNMTVLFVEKTPWTEHDFAVPYPTYFHPAKDAEIF QWQQRMRGMKREWLFTFAGGTRPGDPNSIRHHLIRQCGASSLCNLIQCRKGEKKCLIPST FMRVFQGTRFCLQPPGDTYTRRSAFDAMLAGCV…
OsGT47_14	LOC_Os03g05110.1	MUR3	Chr3	2486920-2489500	MSAMRRRPVLPTHQDDMEKVGGKPPQSRLCFLATLCAMFWVLIFYFHFFVIANEPGSAGA DTAAGAAASIARAELPLPEPERVSDPAVPLPPPALVSEPPPTTATVAKVEDEEKPTAVAH QEAAPRDYAFQRALKTAENKSDPCGGRYIYVHELPPRFNDDMLRECERLSLWTNMCKFMS NEGLGPPLGNEEGVFSNTGWYATNQFMVDVIFRNRMKQYECLTKDSSIAAAVFVPFYAGF DVARYLWGHNISTRDAASLDLIDWLRKRPEWNVMGGRDHFLVGGRIAWDFRRLTDEESDW GNKLLFMPAAKNMSMLVVESSPWNANDFAIPYPTYFHPAKDADVLLWQDRMRSLERPWLF SFAGAPRPDDPKSIRSQLIDQCRTSSVCKLLEC…
OsGT47_15	LOC_Os03g07820.1		Chr3	3978668-3983549	MQMLSWICWLSYTGKRCEEVQKVECNLPSSQEWPVGRWIVSICPAHCDTTRAMCFCGPGT KYPDRPVAEACGFKTILPKKPDDSKLTDWKTPDPDVFTTNKSKPGWCNVNPEDAYSSKVK FKEECDCKYDGLWGRFCETRVECSCINQCSGHGHCRGGFCQCDGGYFGIDCSMPSNYSVA YGMPSWLQPPMNLPDLKNISSSSINVKVVAKKKRPLIYVYDLPAEFDSHLLEGRHYKFQC VNRIYDDKNRTIWTQQLYGAQIALYESILASPHRTLNGDEADYFYVPALDSCLITRSDDA PHLQMPRDLRLRSYHTLEYYRMTYDHIAQRYPYWNRTSGRDHIWFFSWDEGACYAPKEIW NSMMLVHWGNTNTKHKNSTTAYWADNWNYIPID…
OsGT47_16	LOC_Os03g08420.1		Chr3	431977-4322503	MRRRDRRWLWAFAGAPRPGSTKTVRAQIIEQCTRRRPAPTSETRRGGSWSSSIPRVLHPA AWRLLYPQVDVRLHARRLHPGVPPPSVGVHQVHLAPAEGTDYRSYSVSIPHTDVVAGGQN ASIEAALRRIPAATVARMRTSSAFRLIPPRPGGLLPGSASNAAYLRREGKRQVEGPSVYF FLLRVPETYRPCEENLANGPREAAESRGRARGEARVGSEEDVEPGDGVEVDRSPSRWDDM DARPSERSRSDDGDVRGRPV*
OsGT47_17	LOC_Os03g20850.1		Chr3	11805189-11807807	MAAAAASASASCRRRPIAWFFAIAALLFFFSWYLLLDSAAVTPEPLLAARGQGLRVGSSG RKCDPATAALRVFMYDLPAEFHFGLLDWEPQGGGGGGGGGVWPDVRGGGVPEYPGGLNLQ HSIEYWLTLDLLASEQGAPTPCGAVRVRHAAAADVVFVPFFASLSFNRHSKVVPPARASE DRALQRRLLDYLAARPEWRRSGGRDHVVLAHHPNGMLDARYKLWPCVFVLCDFGRYPPSV AGLDKDVIAPYRHVVPNFANDSAGYDDRPTLLYFQGAIYRKDGGFIRQELYYLLKDEKDV HFSFGSVVGNGIEQATQGMRASKFCLNIAGDTPSSNRLFDSIVSHCVPIIISDEIELPFE DVLDYSKFCIIVRGADAVKKGFLMNLINGISRE…
OsGT47_18	LOC_Os04g01930.1		Chr4	585941-587523	MAPGGAPARSFVVVVLAVIALSAIVAVAGTKKALSTVDVEEELDAARAAIRRAARQHRRG GGGDVGSANWLRFYGGEADYDLLSRVYRNPAAFYRSYVEMERRFKVYVYEEGEPPILHEG PCKNIYTIEGSFIEQLELMSPSDAGGGVRTWDPTRAHAFFLPFSVSQMVKFVYRPPSQDR APLRAIVADYVRVVAARHPFWNRSAGADHFMLSCHDWGPYASRGQPELYTNAIRALCNAN TSEGFRPGKDVSVPEINLYDGDMPRELLAPAPGLESRPLLAFFAGGRHGHVRDLLLRHWK GRDAATFPVYEYDLPAAGDYYSFMRRARFCLCPSGHEVASPRVVEAIQAECVPVVIADGY ALPFADVLRWEAFSVAVAVGDIPRLRERLERIP…
OsGT47_19	LOC_Os04g32670.1		Chr4	19690552-19694678	MGSRTVGWWLLAAAVVLAAAAADSGEAERAAEQHSERISGSAGDVLEDNPVGRLKVFIYD LPRKYNKKMVNKDPRCLNHMFAAEIFMHRFLLSSAVRTLNPKEADWFYTPVYTTCDLTPA GLPLPFKSPRVMRSAIQYISHKWPFWNRTDGADHFFVVPHDFGACFHYQEEKAIERGILP LLQRATLVQTFGQENHVCLKEGSITIPPYAPPQKMQAHLIPPDTPRSIFVYFRGLFYDTG NDPEGGYYARGARASLWENFKNNPLFDISTDHPPTYYEDMQRAVFCLCPLGWAPWSPRLV EAVVFGCIPVIIADDIVLPFADAIPWEEIGVFVEEKDVPKLDTILTSMPIDDILRKQRLL ANPSMKQAMLFPQPAQPRDAFHQILNGLARKLP…
OsGT47_20	LOC_Os04g48480.1	XLT2	Chr4	28900687-28902796	MAAMYRPDPANPAARRPRLVVLLLVAFFALQLLVFLAFRGAPSPSSPDAAVDRVPVSARR DGEDSGCVGGLVYVYDLPPVFNEDLLALCEVLAPMYSLCPYLANDGLGFPAKGGNQSEFP PAELVGSWYSSDQFALEHIVHRRLLSHRCRTTDPARATAFFVPFYAGLAVGRHLWATNAT DADRDRDCLALLSWLHAQPYYKRSNGWDHFIALGRITWDFRRSPDGGWGGSFLLMPGLAN TTRLVIERDPWDAMDVGIPYPTSFHPRTAADVRAWQQYASSRSRPKLFAFAGAPRSAIKG DFRGLLLEECQAAGDACGALDCGEGRCIKQNELVMELFLGARFCLQPRGDSFTRRSLFDC MVGGAVPVLFWRRSAYRQYGWYVPVGNSQEEEW…
OsGT47_21	LOC_Os04g54100.1		Chr4	32235313-32235699	MAAVAAATCDDTVGECDVDDEEEVEEMALMGAAGAAAGETGCRTLQRRLLDYLAARPEWR RSGGRDHVVLAHHPNGMLDARYKLWPCVFVLCDFGRYPPSVVGLDKDVIAPYRHVVPNFA GQRLRRLR*
OsGT47_22	LOC_Os04g57510.1		Chr4	34209652-34214800	MARLALLAVPVALLLSLSFLLLRPASPPLPFSRQQAASGPDRRRLLRVYVAELPRALNHG LLDLYWSLPAADSRIPASSDPDHPPPRPPRAHSPYPDSPLIKQYSAEYWLLASLQPGSSS APAVRVVADWRDADVVFVPFFATLSAEMELGWGAKGAFRRKEGNEDYRRQREVVDRVTAH PAWRRSGGRDHVFVLTDPVAMWHVRKEIAPAILLVVDFGGWYKLDSNSASSNVSHMIQHT QVSLLKDVIVPYTHLLPTMHLSENKDRPTLLYFKGAKHRHRGGLVREKLWDLMVNEPDVV MEEGYPNATGREQSIKGMRTSEFCLHPAGDTPTSCRLFDAVASLCIPVIVSDEIELPFEG MIDYTEFAIFVSVNNSMRPKWLTNYLRNVPRQQ…
OsGT47_23	LOC_Os06g07887.1		Chr6	3872355-3874569	MAPRLSVKKCLIILALAAAAAIAGFLSVAGAGRGRSSSSSPARRLSNGLAAERARMAMAR AASPTVERELDAARAAIRRAARRRRHGDLAGGEGRSSSNVSSAKWLSFFGDADHARLERV YRNPAAFYRSYVEMERRFKVYVYEEGEPPIAHEGPCKNIYAVEGRFIEELELMAPPLGGV RTWDPARAHALFLPLSVSQMGPHASRGHPELYANAIRALCNANTSEGFRPDKDVSIPEIN LYDGDMPPELLSPAPPPPRPFLAFFAGGRHGHVRDLLLRHWKGRDPAVFPVYEYDLPSIP VSVSGDGDTDAGGEGGNPYYWYMRRSRFCLCPSGHEVASPRVVEAIHAGCVPVVVADGYA PPFADVLRWEAFSVAVAVADVPRLRELLERIPA…
OsGT47_24	LOC_Os06g23420.1		Chr6	13674054-13676418	MPESPTSPPTSPLPGSPTNNATPPSPVSAFLRATVLFAAFLALQLVLFKSLLTFPSSRFL PAPRRSNSTWANGAVDDAEECKAGLIYVYDLPPEFNHDLVAHCDRLWPWYSFCPYLSNGG LGRPAAEVPALSAVVPNASLPNWYNTDQFPLEVIVHRRLLSHRCRTIDASLATAFYVPFY AGLDVGSHLWGPNSTVADRDRAGARLLRWLRGQPFFAKSGGWDHFITLGRITWDFRRYGA DGWGTNLVLMPGMENVTRLVIEGDRLDPLDVGVPYPTGFHPRRAADVRAWQEHVLSLDRR NLFGFAGAPRSGFPDDFRDVLLEECEDAGSDRCRAVDCRGTRCNDDGAAVMRLFMGSRFC LQPRGDSFTRRSLFDCMVAGAVPVLFWRRTAYD…
OsGT47_25	LOC_Os06g43160.1		Chr6	25941640-25943653	MERSFRVFVYPDGDPGTFYQTPRKLTGKYASEGYFFQNIRESRFRTDDLEKAHLFFVPIS PHKMRGKVPSSLLLVTYAWLILHIRSYDRSILFLDLYWWCPLCSSFRGHWGVGADHFFVT CHDVGVRAFEGLPFIIKNSIRVVCSPSYNAGYIPHKDVALPQILQPFALPAGGNDIENRT ILGFWAGHRNSKIRVILARIWENDTELAISNNRINRAIGNLVYQKHFFRTKFCVCPGGSQ VNSARISDSIHYGCMPVILSDYYDLRFSGILNWRKFAVVLKESDVYELKSILKSLSQKEF VSLHKSLVQVQKHFEWHSPPVPYDAFHMIMYELWLRHHVIKY*
OsGT47_26	LOC_Os06g46690.1		Chr6	28363631-28368048	MASKNSCACHGVVVTLASCLLLVAAAVSVSVLAAHVAVGRVWSPAGAAAAAGHHHSLSPA WVPSPSSRHAHHARELVNRRVQVGRMEAGLVQARVSIRRASRTRSCTPDDGGGFIPRGAV YRDAYAFHQSYIEMEKRFKVWTYREGEPPVVQKGGAAFAGNDGIEGHLIAELDSSGGGGR HRARHPGEAHAFFLPISVASIAGYVYRRDMIDFWDPQLRLVAGYVDGLAAMYPFWNRSRG ADHFLVSCHQWAPILSAAKAELRGNAIRVMCDADMSDGFDPATDVALPPVVASARATPPQ GRVASERTVLAFFAAGGGGGGAVREALLARWEGRDDRVVVYGRLPAGVDHGELMRRARFC LCPCGGGEGAAAASRRVVEAITAGCVPVLVDDG…
OsGT47_27	LOC_Os07g09050.1		Chr7	4729466-4733531	MRASSFSSLMLPCSHGHGGGRATASTCAAAAAACLALVALVILVVSMDPRAQASSWFFLS SSSSSSSSSSSTLVRPAASSHAASLRKPSSWGGGNGGGGGGEHLLVTSSSFGSGGGARGS WSRNSTSKEVLFQGGGGGGGDEMTSTAAAPTPALIIGSSSGDGVSPSRVAVTAAAAEPTP ALAPAPAPEWGVGDAASGDDIIQVMPQAQRRRDVKLELLELGLAKARATIREAIQNKDNK PPLTDKDYVPVGPVYRNAYAFHRSYLEMEKVFKVFVYEEGEPPVFHDGPCRSIYSTEGRF IYAMEMENRMRTRDPDQAHVFFLPFSVVKMVKMIYEPNSHDMDPLRRTISDYINVVSTKY PHWNRSLGADHFMLSCHDWGPYVSSANGHLFSN…
OsGT47_28	LOC_Os07g37960.1		Chr7	22780108-22783758	MPSRRPSPLLLLLLALALAFLFLLLSPSAPSASHLSSSLASAAAAVSTPASSPPAPVKIY MYDLPAKFTYGVVRSYMAARARAGAAGAASAIPDDELRYPGHQHSAEWWLFKDLRRRGPL DRPVARVDDPADADLFYVPFFSSLSLVVNPIRPSAAAANASDAAEPAYSDESTQEELLVW LERQPYWRRHQGRDHVFICQDPNALYRVVDRISNAVLLISDFGRLRSEQASLVKDVILPY AHRINSFQGDVGVESRPSLLFFMGNRYRKEGGKVRDTLFQVLENEADVIIKHGAQSRESR RMATRGMHSSKFCLHPAGDTPSACRLFDALVSLCVPVIVSDYIELPFEDVIDYRNISIFV ETSKAVQPGFLTSTLRGISSQRILEYQREIKKV…
OsGT47_29	LOC_Os08g34020.1		Chr8	21314563-21317684	MALTRRLLIDLSSRRRLFNAGKFSTTHKKKPVLHEAVSLAGFLRCSRALVSWMVAERKMQ PSPAAPPAAEHRRRALLRYVVFLAVSLLAFSCWALVSSRIDGAVLAATAGGEHDDHDGII VRSSTQAEMPARGGNATSRGAVEVGVGTPAAMITRQPSSGETTTTAALAATCDAESALLR VYLYDLPPEFHFGMLGWDGKAAGAAWPDVAGDPRAVPRYPGGLNLQHSVEYWLTLDILSS TTSGDHRRRRPCTAVRVTNASLADVFLVPFFASLSYNRQSKSPHGGHGSGGRSDRQLQGE LVRYLARREEWRRWGGADHLVVPHHPNSMMDARRRLSAAMFVLSDFGRYPPDVANLRKDV IAPYKHVVPSLGDGDSPGFEQRPVLAYFQGAIH…
OsGT47_30	LOC_Os10g10080.1		Chr10	5487008-5490451	MGTRRRSARARARPPLAMPLAVLLLFACSSGVAAAAAQGIERIKDDPVGKLKVYVYELPP KYNKNIVAKDSRCLSHMFATEIFMHRFLLSSAIRTSNPDEADWFYTPVYTTCDLTPWGHP LTTKSPRMMRSAIKFISKYWPYWNRTEGADHFFVVPHDFAACFYFQEAKAIERGILPVLR RATLVQTFGQKNHACLKDGSITVPPYTPAHKIRAHLVPPETPRSIFVYFRGLFYDTSNDP EGGYYARGARASVWENFKNNPMFDISTDHPQTYYEDMQRAVFCLCPLGWAPWSPRLVEAV VFGCIPVIIADDIVLPFSDAIPWEEIAVFVAEDDVPQLDTILTSIPTEVILRKQAMLAEP SMKQTMLFPQPAEPGDGFHQVMNALARKLPHGR…
OsGT47_31	LOC_Os10g32080.1		Chr10	16851912-16853554	MAASVVSDKSSGGASLLRPSRVLFLAVLSTAFWSVIFYAHHSAVQGNATMASVLLRPSSF SRPLLTSFRLIGGGLDRCAGRRVYMYELPPRFNAELVRDCRLYSRSMDVCKLVVNDGFGP ALPGGGALPERDVYDTDQYMLALIYHARMRRYECLTGDAAAADAVFVPFYAGFDAAMNLM KSDLAARDALPRQLAEWLVRRPEWRAMGGRDHFMVAARPVWDFYRGGDDGWGNALLTYPA IRNTTVLTVEANPWRGIDFGVPFPSHFHPTSDADVLRWQDRMRRRGRRWLWAFAGAPRPG STKTVRAQIIEQCTASPSCTHFGSSPGHYNSPGRIMELLESAAFCVQPRGDSYTRKSTFD SMLAGCIPVFLHPASAYTQYTWHLPRDYRSYSV…
OsGT47_32	LOC_Os10g32110.1		Chr10	16861659-16863255	MAILSAVFWFLVFSLLSGMPGGGDLSSVLFRPSSLSLPLLNSFTFDQNPSPEQQPPPAPA PAEDRCAGRYIYMYDMPARFNEELLRDCRALRPWTAEGMCRYVANGGMGEPMGGDGGGIF SERGWFDTDQFVLDIIFHGRMKRYGCLTGDPAAAAAVFVPFYGSCDLGRHIFHRNASVKD ALSEDLVGWLTRRSEWRAMGGRDHFFVAGRTTWDFRRERDEGWEWGSKLLNYPAVQNMTA ILVEASPWSRNNLAVPYPTYFHPETAADVAAWQRRVRAAARPWLFSFAGGPRKGNGTIRA DIIRQCGASSRCNLFHCHGAAASGCNAPGAVMRVFESSRFCLEPRGDTMTRRSTFDAILA GCIPVFFHPGSAYTQYTLHLPPERGGWSVLIPH…
OsGT47_33	LOC_Os10g32160.1		Chr10	16892830-16894805	MKRHNAAEVPVPVSYGGERDEKTGSKVDKMGGGAARRWRSGGCCSRLWLVLVVFATVTML LRHRYDSGLGHGAAAVVRIEPVHRKVKPADRGGARPSFSDSGSAKPVTVDHKSATTDSST GTESDGGGEPSSASSSLPAAAHPFSRALAAAGDKGDRCGGRYVYVQELPPRFNTDMVKNC VALFPWKDMCKFTANGGFGPPMSGGGGMFQETGWYNSDKYTVDIIFHERMRRYECLTDDP SLAAAVYVPFFAGLEVWRHLWGFNATARDAMALEVVDIITSRPEWRAMGGRDHFFTAGLI TWDFRRLADGDAGWGSKLFSLPAIKNMTALVVEASPWHLNDAAIPFPTAFHPASDEAVFV WQDKVRRLERPWLFSFAGAARPGSAKSIRSELI…
OsGT47_34	LOC_Os10g32170.1		Chr10	16896684-16898801	MKRHNTAEVPVPVSYGGKVEKTMGGAKQGRGGGGGCCSRLWFMVVLSATVTLLVRHCYDS GVIGHGAAAGGVVRIEPVHRGLYHTRKASPVDRGGGGGGTSFSGHSPSPPDAGGSAKPES PHDSGVKAPSELTTVEHTKQPSEPASTGTESDDGGKPSSASSSSLPAAAHPFARALAAAG DKGDRCGGRYVYVQELPPRFNTDMVKNCATLFPWTDMCAFTANGGFGPQMSGGDGGVFQE TGWYNSDQYTVDIIFHDRIRRYECLTDDPSLAAAVYVPFFAGLEVARHLWGFNVTTRDAM ALEVVDIITSRSEWRAMGGRDHFFTAGRTTWDFRRLNDGDAGWGSKLFSLPAIKNMTALV VEASPWHLNDAAIPFPTAFHPASDEAVFVWQDK…
OsGT47_35	LOC_Os10g40559.1		Chr10	21721755-21723342	MPNPLFFLLLLAAAAAATAGAGEGGATRKDPCAGRRIHIRRLPPRFNAHLLRHCDAGFPL ADPSTPATSSPPCESLVNHGLGPRTHSSSRSWYRTDTRLLEVFFHRRVAERGCLVADPAL ADAVYLPYYAGLDSLPYVLDPALLDSSAQHGAELAEFLARDRPQILARRHGHDHFLVLAG SAWDYSQPVRAAAAAAAEARLWGTTSLLRLPALGNLTFLTLESRAWPWQEHAIPHPTSFH PASLPRLRAWLARARRARRPALMLFSGGVSRPSRPNIRGSILAECANRTDACVVVDCSGG RCSHDPIRYMRPMLHSRFCLQPPGDTPTRRSTFDAILAGCVPVFFEDAAARRQYGWHLPP ERYDEFSVYIPKESVVFGGVKIAETLAAVGEGE…
OsGT47_36	LOC_Os11g03410.1		Chr11	1288704-1292354	MPPRARTLLMPLAAATLLVASTIFLFAATGARWRPADTGLPVPAADFSAAVIESAVTDAA AAKEELSFVDENGRPDDPASSSAAAARCDPSHAAVRVFMYDLPPEFHFGLLGWSPPTDGA ADAAMWPDVGSGAAAPRYPGGLNQQHSVEYWLTLDLLSSSSPPCGAAVRVADSRDADVVF VPFFASLSYNRHSRVVPPEKVSRDKGLQERLVRYLMAQPEWKRSGGADHVIVAHHPNSLL HARSVLFPAVFVLSDFGRYHPRVASLEKDVIAPYKHMAKTFVNDSAGFDDRPTLLYFRGA IFRKEGGNIRQELHYMLKDEKDVYFAFGSVQDHGASKASQGMHASKFCLNIAGDTPSSNR LFDAIVSHCVPVIISDDIELPYEDALDYSKFSI…
OsGT47_37	LOC_Os11g24300.1		Chr11	13844635-13848755	MPLTLFFFLLSFLPLTQVVFFATGSGAVREVLLTRWEGRDDQELLYGLLPAGVDHGKLMG RARFCLCLTGDDEGAAAASRRVVEAITAGCCTVGIAVSLLRCRRRFHDEDFVLLFHDWHR LLQHGSGFKLSTTVEFVCFCNLRTPMPAGGGPRGTTDPVAQIHLMMKTLYNG*
OsGT47_38	LOC_Os12g03100.1		Chr12	1172671-1175788	MPPRARTLLMPLAAATLLVASTIFLFAATGARWRPADTGLPVPAADFSAAVLESAVTDTT AAAKELSFVDENGRPDDPASSSAAAARCDPTHAAVRVFMYDLPPEFHFGILGWSPPTDGA ADAAMWPDVGSGAAAPRYPGGLNQQHSVEYWLTLDLLSSSSPPCGAAVRVADSRDADVVF VPFFASLSYNRHSRVVPPEKVSRDKELQEKLVRYLMAQPEWKRSGGADHVIVAHHPNSLL HARSVLFPVVFVLSDFGRYHPRVASLEKDVIAPYKHMAKTFVNDSAGFDDRPTLLYFRGA IFRKEGGNIRQELYYMLKDEKDVYFAFGSVQDHGASKASKGMHASKFCLNIAGDTPSSNR LFDAIVSHCVPVIISDDIELPYEDALDYSKFSI…
OsGT47_39	LOC_Os12g12290.1		Chr12	6754961-6756770	MEANYPKYVLYGLLIVGSWLLSCLLHFQVFHLSLFPYPSYLLSRRVVLPLALNARFLPPR PDVAGDDDGGIVRRRSSSPAKAAAEASCDGRYVYVLEVPRRFQMLTECVEGPKVFDDPYH VCVVMSNSGLGPVIPPAAAGNATVDGDIIPNTGWYNTDQYALEVIFHNRMRRYECLTSDM AAATAVYVAFYPALELNRHKCGSSATERNEPPREFLRWLTSQPSWAALGGRDHFMVAART TWMFRRGGAGDSLGCGNGFLSRPESGNMTVLTYESNIWERRDFAVPYPSYFHPSSAREVS AWQATARAARRPWLFAFAGARRANGTLAIRDHIIDECTASPPGRCGMLDCSHGLEGSITC RSPRRLVALFASARFCLQPPGDSFMRRSSIDTV…
OsGT47_40	LOC_Os12g16230.1		Chr12	9285017-9285334	MPLTLFFFLLSFLPLTRVAFFAAGGGAMREVLLTRWEGRDDQVLLYGLLPAGVDHGELMG RARFCLCPTGDDEGAAAASRRVVEAITVGCCAVDSAVSFLRRRHR*
OsGT47_41	LOC_Os12g38450.1		Chr12	23602840-23604420	MDGSHGSAAALRATGRCLAPLIIPASCVVWVLFFFPSPSPDVAVRRDGFLPAVTLPVQRA GDTPPPPPIIDASPPPPSTSPPPPPPRRGRPARRDRCAGRYVYMHELPSRFNSDLLRDCR TLSEWTDMCRHVANGGIGPRLPPAARGGVLPATGWYDTNQFTLEVIFHARMRRYGCLTAD ASRAAAVYVPYYPGLDVGRYLWGFSNGVRDLLAEDLAEWLRGTPAWAAHGGRDHFLVGGR IAWDFRREDGGGEGSQWGSRLLLLPEAMNMTALVIEASPWHRRTDVAVPYPTYFHPWRPS DVSSWQRDARRARRPWLFAFAGAGRGNGDDHDRHHGGGVVRDRVIAQCARSRRCGLLRCG ARGRRDDCYDPGNVMRLFKSAAFCLQPRGDSYT…

## Sheet: Populus trichocarpa
CAZy Family _Gene ID1	Model	Chl	Chromosome position	Protein sequence
PtGT47_1	Potri.001G120800.1	Chr1	9729119-9730701	MACKTTSFLCFCLLLISIDSIISQDITDTERGCSNRWIHVRSLPPRFNLDLLANCSEYPLFNNFCPYLANHGLGPRTHNKSQ SWYRTNPLLLELIFHHRMLEYPCLTSDPNQANAIYLPYYAAIDALRYLYGPEVNSSMEHGLELYDYLQDNEGWIWSRNHGADHFLVMSRPAWDFSQSVDV DPPIWGTSFLELPEFYNVTVLIVEGRAWPWQEQAVPYLTSFHPPNLGFLESWIKRVKASKRTTLMLFAGGGGVGSTPNIRRSIRNECESSSSDIYVNNVE GFDYPKMRKVCDIVDCSNGICEHDPIRYMRPMLQATFCLQPPGDTPTRRSTFDGIIAGCIPVFFEEQSAKSQYGWHLPEEMYRDFAVFIPKEDVVFKGLR ILDVLTGIPRNEV…
PtGT47_2	Potri.001G105300.1	Chr1	8390041-8391877	MAVSINRRKSKPSKKAETNEHCSCGTFLFKILSRTPLGILLLILVYLWSSSTTIISGKIVHICVSSRKLSNLYCLSAGTQPN FEIPVPLINNSFTKVANVFTKDSIPAVIDGTDKNGNEEIAIAKKAVKEQLQLHRSWMPNTNHASCDGRGVYVYDLPSKFNKDLIGQCGDMMPWTDFCKYF NNEALGEPIANLGKGWYHTHQYSLEPIFHSRILSHPCRVYNESEAKLFYVPYYGGLDILRWHFKNVSDDVKDALAMDLMKWLEHRRPWVQNSGTDHVFVL GKISWDFRRKNYTSWGTRFLELEQMQNPIKLLIERQPWEVNDIAIPHPTFFHPHSDDDIVAWQQKIIETTRKNLVSFAGAARPDQPESIRSTLINQCTST SSDKCQFLDCKSG…
PtGT47_3	Potri.001G072500.1	Chr1	5756440-5758702	MNCPYKSVLISQHLPLSPKKNRERRMKMKRPPKLQLKRLLGMLVLAVLLSSSCIALFGFYKHHASLAVTSLVAPQSTTFYPI QNHHHHDRQNLSLNAPQQAATLFPPPQTNTVDSVLETGPYHNWELFAADFQEMMRHLKIFVYPDTFNRSSPFANIFLPHENPLNNPKLGNYFSEHMFKVS LLHSPLLTATPEKAHFFFLPFSINDLRNDPRVHSEAKISQFVAQYTSSISSSFRFWNASGGADHFYVCCHSVGREAPSRHHDLRNNAIQLTCCSSYFQRF YLSHKDVGLPQVWPRTDQTALNPPHASVCYLDVNTYRCRHRLVYFAGRVQNSQVRQQLVNLWGNDTQFDIFNGNPTFPYEEGFKRSKFCLHVKGYEVNTA RVSDAIHYGCIPV…
PtGT47_4	Potri.001G068100.1	Chr1	5428724-5432679	MRTCLWVFAVVLVFGFVDGKKIERLRTERISGGSAGDVLDDDPVGRLKVYVYELPSKYNKKLLQKDPRCLTHMFAAEIFMHR FLLSSPVRTLNPDEADWFYSPIYPTCDLTPMGLPLPFKSPRMMRSAIQLISSNWPYWNRTEGADHFFVVPHDFGACFHYQEEKAIERGILPLLQRSTLVQ TFGQRNHVCLNEGSITIPPFAPPQKMQAHQIPPDIPRSIFVYFRGLFYDVNNDPEGGYYARGARAAVWENFKNNPLFDISTDHPTTYYEDMQRAIFCLCP LGWAPWSPRLVEAVVFGCIPVIIADDIVLPFADAIPWEEIGVFVAEEDVPNLDTILTSIPPEVILRKQRLLANPSMKRAMLFPQPAQPGDAFHQILNGLA RKLPHDRSVYLKS…
PtGT47_5	Potri.001G321000.1	Chr1	32574646-32576814	MHYVKMMEKPIIRKCCNNQLWLVILISFVLCFVLLCFDYSALTGNQDGVTAVLVSNYENPITTQKSESLQFTTSLNETLIRP NRTDFITRQPSKDQQSVKEKPVADSCSGEYIYIHNLPRRFNQELIESCESITVGTERNMCPYLVNSGLGHEVENFEGVLLNKSWYATNQFLLAVIFHNKM KQYKCLTNDSSLASAIYVPFYAGLDVGRYLWGWMVSQPEWKKMWGRDHFLVVGRISWDFRRQTDNESDWGSKLRFLPESNNMSMLSIESSSWNNDYAIPY PTCFHPSKDSEVLQWQDKMRRQKRPYLFSFAGAPRPDLQDSVRGRIIEECQASKNLCKLLECSYGVNGAITCDNPGNVMRLFQNSVYCLQPAGDSYTRRS IFDAILAGCIPVF…
PtGT47_6	Potri.001G381900.1	Chr1	39774835-39776298	MVVKKKSISSASPWTEKGKYSKTNEIHYSFLKPQLRHALLLCFLLSVWFVILRCFLLSSSTSENNIEKLNVDEKAPKTTSKS SAISKCEGGMSVYLYDMPAEFNKGLLKDCSHLNPYTDMCPHVANRGLGQPLSYMAESAVATTWFATHQFIAEMIFHARMENHPCRVLDPINAKLFYVPFY GGLDASSKFHDANLTARDELAVRLADYLRSKPWWERHHGKDHFLVLGRTAWDFLRRNNNFGNSLLNLPDVQNMSVLTVERNPWDRVHNQHGIPYPSYFHP YTSHEMMTWQNKMRQSSRPHLFSFIGGPRRGVEKAAVRDELIRQCSESGRCKLLKCGKGPSKCHYPIEVLKVMSQSQFCLQAPGDSFTRRSTFDSVLAGC IPVFFSPHTVYTQ…
PtGT47_7	Potri.001G382200.1	Chr1	39792277-39793661	MEKQNVDEKAKTTSKSSAISKCEGGMSVYLYDMPAEFNKGLLKDCSHLNAYTDMCPHVANRGLGQPLSYMVESAVATTWFAT HQFIAEMIFHARMENHPCRVLDPINAKLFYVPFYGGLDASSKFHDANLTARDELAVRLADYLRSKPWWERHHGKDHFLVLGRTAWDFLRRNNDFGNSLLN LPDVQNMSVLTVERNPWDRVHNQHGIPYPSYFHPYTSHEMMTWQNKMRQSSRPHLFSFIGGPRRGVEKAAVRDELIRQCSESGRCKLLKCGKGPSKCHDP IEVLKVMSQSQFCLQAPGDSFTRRSTFDSVLAGCIPVFFSPHTVYTQYEWFFPAGDAREYSVYIDENALKTGNGSKRVVSIEEELFKIEREKVERMRSAV INLMPRLTYAHPN…
PtGT47_8	Potri.002G072300.1	Chr2	5002283-5005248	MGSPNNKPARIFSPHNHTSPPCTRTHQIGALLLIATTFFLTRLFDQAFTTCPPSSLNNDHSSPNVVHVSDGGSLSWPQRGYG SHLSLKIYVYEEDEIDGLKELLRGRDGKISADACLKGQWGTQVKIHGLLLESRFRTRKKEEADLFFVPAYVKCVRMMGGLNDKEINHTYVKVLSQMPYFR RSGGRDHIFVFPSGAGAHLFRSWATYINRSIILTTEADRTDKKDTSAFNTWKDIIIPGNVEDGMTKRRIAMVQPLPLSKRKYLANYLGRAQGKVGRLKLI ELAKQYPDKLESPELKFSGPGKFGRMEYFQHLRNAKFCLAPRGESSWTLRFYESFFVECVPVILSDQAEFPFQNVIDYTQISIKWPSTRIGLELLEYLES IPDENIEQMIAAG…
PtGT47_9	Potri.002G210000.1	Chr2	18008397-18011346	MSEKAKFFSRSLFFLITISIFLLILSSFSLVQFPGTHFIPRSVFKLILVNSTSFFLKPNAQTELVKFPFFSSTDTNLSMRCG SLSCPNTNMGASRCYRNKTCGRNQALRKLKVFVYDLPPEFHFGLLGWKGNTNQTWPNVDSHSRIPPYPGGLNLQHSVEYWLTLDLLASNTPKVGTAVRVQ NSSQADIVFVPFFSSLSYNRHSKLHGKEKVSVNKMLQTKLVQFLTARDEWKRFGGNDHLIVAHHPNSMLHARKKLGSAMFVLADFGRYPVEIANLGKDII APYKHVVRTIPSGESAQFDRRPILMHFQGAIYRKDGGAIRQELYYLLKDEKDVHFTFGTYRGNGIKKAAQGMASSKFCLNIAGDTPSSNRLFDAIASHCV PVIISDDIELPFE…
PtGT47_10	Potri.002G256200.1	Chr2	24549266-24552355	MRRRSPTNVSSELMEKGGGKNQHNRLCLLASLSAFFWILLLYFHFVVLAGSTVDKSVKLDPTQLNPESKTPAFVTDNRLPDN PLKSSPSTSETIPSNATPSSTETTPLKTTSTSSQKIEKFPFTRALRTVENKSDPCGGRYIYVHDLPSRFNEDMLKECRSLSLWTNMCKFTTNAGMGPPLE NVEGVFSNTGWYATNQFAVDVIFSNRMKQYECLTNDSSVAAAIFVPFYAGFDIARYLWGHNVSRRDAASLDLVDWLMKRPEWGIMQGRDHFLVAGRITWD FRRLTDEESDWGNKLLFLPAAKNMSMLVVESSPWNANDFGIPYPTYFHPAKDADVFTWQDRMRKLERKWLFSFAGAPRPDNPKSIRGQIIDQCKKSKVGK LLECDFGESKCHS…
PtGT47_11	Potri.003G079000.1	Chr3	10698633-10707019	MIGNRELFGVVLMRELLWRCAWKKVDWRKLLFLGVVMTIVGVLVPTYAFPHTVNMWFLSPPLAVSSYVSLNGSMQLREALTE ARVQQFPPVSAASVLSPNTTVPSKNKRAKVSRTRNSLLKRRKKKSKENDESKVVLPPPRSPIPPRMQRFIWSLSPNDALIYAKREIEHAPVVIDDPYLSA HIFRNISVFKRSYELMETILKVYIYPDGDKPIFHQPHLYGIYASEGWFMKFMEASREFVSRDPEKAHLFYLPYSARQLEVAVYVPNSHNLRPLSIFMRDY ANMIAAKYPYWNRTHGRDHFLVACHDWGPYALTMHEELTKNTMKALCNADVSEGIFTAGQDVSLPETTIRSPKRPLRNVGGGIRVSQRPILAFFAGNLHG RVRPTLLKYWHNK…
PtGT47_12	Potri.003G112200.1	Chr3	13575667-13577026	MLEYPCLTSDPNQANAIYLPYYAAIDSLRYLYGPAVNNSMEHGLELYDYLQDNEGWIWSRNHGADHFLVMSRPALDFSQSVD VNPPIWGTSFLELPEFYNLTVLIVEGRAWPWQEQAVPYLTSFHPPNLGLLESWIKRVKASKRTTLLLFAGGGGVGSSPNIRRSIRNECENSSLSNSSDMR KVCDIVDCSNGVCEHDPIRYMRPMLRATFCLQPPGDTPTRRSTFDGIIAGCIPVFFEELSAKSQYGWHLPEEMYRDIAVFMPKEDIVFKGLRILDVLMGI PRDEVRRMRERVIELIPRVVYRKHGSSLDLRARKDAFDMAVEGALQRIHSRLKARDFDQ*
PtGT47_13	Potri.003G126000.1	Chr3	14693664-14694737	MCGDIMPWTDFFKYFNNEALGEPIANLGNGWYHAHQYSLETIFHSRILRHPCRVYDENEAMLFYNVSDDVKYTSALDLMKWL EYREPWVQNSGIDHVFVIGKFSCTRFLELEQMKNPVKLMIERQPWEVIDIGIPHPTFFHPHSDDDIVAWQQKIIGTTRKRLVSFAGAARPDQPHCIRSIL LNQSTSTISDNCQFLGCKSGGCDQPESVTKLSLESEFCLQPPGDSPARKSVFDKLISGCIPVFFYPFTAYDQYPWQLPEDHGKDSEFIDQEEVRQMKVNA VERLSSISAREREDMRRYVVYEVLPELVYGDSSSRFEDAISITMNTCSR
PtGT47_14	Potri.003G162000.1	Chr3	17296689-17300534	MRVCLWFFVVVIVFGFGDGKNADQRLRTERISGSAGDVLEDNPVGRLKVYVYELPSKYNKKLLQKDPRCLNHMFAAEIFMHR FLLSSPVRTLNPEEADWFYTPIYPTCDLTPTGLPLPFNSPRMMRSAIQLLSSNWPYWNRTEGADHFFVVPHDFGACFHYQEEKAIERGILPLLRRATLVQ TFGQRNHVCLNEGSITIPPYAPPQKMQAHQIPLDTPRSIFVYFRGLFYDVNNDPEGGYYARGARAAVWENFKNNPLFDISTDHPTTYYEDMQRAIFCLCP LGWAPWSPRLVEAVVFGCIPVIIADDIVLPFADAIPWEEIGVFVAEEDVPHLDTFLTSIPPEVILRKQRLLANPSMKRAMLFPQPAQPGDAFHQILNGLA RKLPHDRTVYLKP…
PtGT47_15	Potri.005G147500.1	Chr5	12994853-12999194	MTAGKLSQQLQQQQQVQQSMCSLKGSLRTLAILTLVSFTYLSFNSLHSSYFSSSSSISASSVSLAPATKKTTILVKDYDDDE ISDLYHSPRVFKLNYEEMERNFKIFIYPDGDPNTFYQTPRKLTGKYASEGYFFQNIRESRFQTQDPDQAHLFFIPISCHKMRGKGISYENMTIIVDNYVE SLKSKYPYWNRTLGADHFFVTCHDVGVRATEGVPFLIKNAIRVVCSPSYDVGFIPHKDIALPQVLQPFALPAGGNDVEKRTTLGFWAGHRNSRIRVILAR VWENDTELDISNNRINRATGHLVYQKRFYGSKYCICPGGSQVNSARIADSIHYGCIPVILSNYYDLPFNDILDWHKFSVILKEQDVYRLKQILKDIPDNK LVSLHKNLVKVQK…
PtGT47_16	Potri.005G187400.1	Chr5	20482421-20485342	MGSPNNRPTRIFSSHHHNTPPCTRSHQIGALLLVASTFFLTRLFDHPFSTCPPSSLNHDHTSQNVVHFSDGGYLSWPQMGYG THLSLKIYVYEEDEIDGLKELLRGREGKISADACVKGQWGTQVKIHRLLLQSRFRTRKKGEANLFFVPAYAKCVRMMGGLNDKEINHTYVKALSQMPYFR RSGGRDHIFVFPSGAGAHLFRSWATYINRSIILSPEGDRTDKKDTSSFNTWKDIIIPGNVEDGMTKRGAAMAQPLPLSKRKYLANYLGRAQGKVGRLKLI ELAKQYPDKLECPELKFSGPEKFGRMEYFQHLRNAKFCVAPRGESSWTLRFYESFFVECVPVILSDQAEFPFQNVIDYTQISIKWPSTRIGLELLEYLES IPDEDVERMIAAG…
PtGT47_17	Potri.006G054800.1	Chr6	3999084-4007471	MITISKWKCSWSLMATIASIVALVSVVHLFLFPVVPSFDPFSVWQVQDSCGPNNESVDGRTGHDPGNLQPVLDLEHKFPADL HRAVFYRNAPWKAEIGRWLSGCDAVTKEVSVVETISGRSCKNDCSGQGVCNYELGQCRCFHGFSGEGCSERLHLECNYPKSPELPYGRWVVSICSAHCDP TRAMCFCGEGTKYPNRPAAETCGFQLSLPSEIGAPRQVDWAKPDLDIYTTNKSKLGWCNVDPAEGYANKVKFKEECDCKYDCLSGRFCEVPVQCSCINQC SGHGHCRGGFCQCANGWYGTDCSIPSVTSSVREWPRWLRPAQLDVPDNAHLTGKLVDLNAVVKKKRPLIYIYDLPPKFNSLLLEGRHFKFECVNRLYNDN NATIWTDQLYGAQ…
PtGT47_18	Potri.006G064700.1	Chr6	4751012-4753700	MATFTSSFISFLLLSAIVLTLFFLCLSPFNQTTKISSRSSSFFTPNYSIDGNTNHTFDSFQSFSSPILLLPPPNPTFERLQP SPSPSPSPSPSPSQGISLITRHERKKTRFDGIEAGLARARAAIYEAVRSHNSSSYKEGSYIPRGAMYRNHYAFHQSYTEMEKRFRIWVYREGELPLVHSA PLNLIYSIEGQFLDEMESGKSPFAASHPDEAHTFLLPISVAYIIHYIYRPLVTFSRVELQRLVQDYVTVVAGKYPYWNRTEGADHFLVSCHDWAPDISRA NPRLYKNFIRVLCNANTSERFEPRRDVSIPEINIPFGKFGPPGKGLPPSKRSIFAFFAGGAHGYIRKLLLEHWKDKDDEIQVHEYLDHNKKNDYFKLMGQ SKFCLCPSGYEVA…
PtGT47_19	Potri.006G064900.1	Chr6	4765561-4768575	MATFLSSPINCLLQSAFLSTLLLVCLSPFYQPINISSRLSSFYTPNFQPYPSTILLLPPPNTTLGVGQDAQITWKIKVSPFD ERLRPSRSPVLLAVQNITKIKTGFERIEDGLARARDAILRAIRSRNSSSYKKGSYVPRGVIYRNQYAFHQSHTEMEKRFKIWVYKEGELPVLHGGPVNNI YSVEGQFLDEIERGKSNFIARHPDEAHAFLLPLSVAYIMHYIYKPRVTFSRHQLQTLVTDYVRVIADKYTYWNRTNGADHFSISCHDWGPDISRANPELF KYFIRALCNANTSEGFQPQRDVSVPEIFLHVGKLGLPREGAQPPSKRPILAFFAGGAHGRIRKVLLKRWKDKDGEIQVHEYVTQRKKNNNLYFKLMGQSK FCLCPSGHEVASP…
PtGT47_20	Potri.006G238900.1	Chr6	24806236-24809541	MPRRFCFGSKIGIYFLTELAFGIVFTIFVLKLDFWSFCGADRTYFGDPFVWIRSPLRFMDQGYQLLCLAKARRLLFLVGATV AIVIVVQYLEFPSSRVLVSLFSAVNTRSFMSRNSSTGSEALGNMTLSNGLNTTNTGILHETTDSDEASDDKKETAEVNKSEEKEGSPNNSNASESKRGSS DSFGLVSNETISDDLANQDKNSTLNTINGSEEEKAMAPDASYINVDKDIAPISGRNKSSDADPGYPSSAPPMMNTFSNKTFSTDENSSPMIFESSNTTSM RKDTAGALKRDENSGLLPNNYSMSTSGSFSSKVTAAKRKTSKKPPSRVISIHQMNELLRQSHASSSSVRPLWPSGVDQEMLFAKSQIENAPLIKNETRLY APIYRNVSMFRRS…
PtGT47_21	Potri.006G239000.1	Chr6	24812676-24815799	MGNEFRYPFTIEIWKLLWFIGLAVAVVLTFQHFELPYGNIISSLSSARKDLGAGNSNLLTHAASSTPEMVSNTTQSNGLNTT AISPDRAQETDNSHGTETPANVNNDVVPERSRGLNESSLIDSRGKESSPEQLVDTNTNSTSYVHNGVVSEGISGLNKSSGIDNHGKESKPEQLVMEPVNS LGNGSAPQETERSLSREDVTSISENIGASDARIAPIAPELLPVDSPPNITLQMNAEPSTIAHIVPIESNTSKVDKDAAPSLENDGKTGDQKKDLTLLHNN PSVTSFPEVKKEPQTPSLEVVSISEMKNLQLQRWSSPNSRRPRWPSVVDQELLNAKSQIQNAPIVENDPVLYAPLYWNISMFKKSYELMEDILKVYIYKE GEMPIFHQPLLNG…
PtGT47_22	Potri.006G064600.1	Chr6	4744764-4747873	MYRNAYAFHQSYSEMVKRFKIWVYREGETPMVHNGPMKHIYSIEGQFIDEMESGKSPFLARNHDEAHAFFLPISVAYIVEFV YLPITTYHRERLVRIFKDYVTVVANKYPYWNRSRGGDHFMVSCHDWAPQVSRDDPELYKNLIRVMCNANTSEGFRPRRDATLPELNCPPLKLTPACRGLA PHERKIFAFFAGGAHGDIRKILLRHWKEKDDEIQVHEYLPKDQDYMELMGQSKFCLCPSGFEVASPRVAESIYSGCVPVIISDHYNLPFSDVLDWSQFSV QIPVEKIPEIKTILRGISYDEYLKMQKGVMKVQRHFVLNRPAKPYDVLHMVLHSVWLRRLNIRVPH*
PtGT47_23	Potri.006G064800.1	Chr6	4758902-4763000	MATLSCSPLSFLLLAALVSTLFFVCLSPFNYQTIKVSSRLSSFYTYNYTFERLQPLPSPVALQPPPNTTVGDDQEITNWRNK GKISERLQPSPAPISLPVQNSSVVFSGPGIPVITRHEKTGFERIEEGLAIARAAIYKAVRSQNSSSYKKGSYVPRGAMYRNQYAFHQSYEEMEKRFKVWI YKEGELPVVHGGPVNDIYSIEGQFLDEMESGKSQFIARHPEEAQAFLLPVSVAYIIHYVYRPRITFSRDQLQRLVTDYVRVIADKHPYWNRTHGADHFSV SCHDWAPDVSRANPGLFKYFIRALCNANTSEGFQPQRDVSIPEIFLPVGKLGPPQEYAQPPSKRSILAFFAGGAHGHIRKILLERWKEKDDEIQVHEYLT QKNKKNNNLYFEL…
PtGT47_24	Potri.007G058400.1	Chr7	6272709-6277215	MTAGKLYQQLQQQQQVQLSMCSLKGSLLTLAILTLISFTYLSFNSLHSSPSPSISASSVSLLPATETTTKTVVVDVGDGEND EISDLYHSPRVFKLNYEEMEHNFKIYIYPDGDPNTFYQTPRKLTGKYASEGYFFQNIRESRFRTLDPDQAHLFFIPISCHKMRGKGTSYENMTVIVENYV ESLIAKYSYWNRTLGADHFFVTCHDVGVRATEGVPFLIKNAIRVVCSPSYDVGFIPHKDVALPQVLQPFALPAGGNDVENRTTLGFWAGHRNSRIRVILA RVWENDTELDISSNRINRATGHLVYQKRFYGTKFCICPGGSQVNSARIADSIHYGCVPVILSNYYDLPFNDILDWHKFSVILKEQDVYQLKQILKDIPDN QFVSLHKNLIKVQ…
PtGT47_25	Potri.007G116800.1	Chr7	13746017-13748454	MMRPYANPRPINIWTARRNIKKIIPVTLGLVFIVTQIIQLQRSPLFREKDSLPDEVFRTRKGNSIGSIYHREDFFLPNYATM ENDFKVFVYPGRDPTTCYDPRDKLKRKYASEHYFLKNLIPSSFFTDDPTVAHLFLIPLSCKKTGGREEKDIENYVKSLISSYPYWNRTLGADHFYFSCHG IDSGTIEEVPLLMKNVIRLVCSPSYDSKYIPHKDISLPQTLELSLHDGDDVWSRSTVMSRPLMIYPEMMLPRRTKLGFWAGSLNSDVRKNLQVFYKGAPE FNFHFFDKMKKAAILDAYENELYGSKFCICPRGNNHVGSVCLTESMTFGCVPVILHDYYDFPFNDVLDWNNFSVILKEEHVPDLEKILKGIPEENYKKMH QNLLQVRKHFQWN…
PtGT47_26	Potri.007G117600.1	Chr7	13783777-13786422	MKNLKRGGLACFFVIVSICFFIYPPGFPPFQGSFQAYAQEAGFFGEVFHVPEAFDPDYEEMERKFKIFVYPHNTSSCSNPRT LDGEYGNEGLFYLNLNLSRFLTKDPEKAHLFLIPISCHSLPAGRSEDERAIAVEDFVKSLISKYPYWNRTLGADHFFVTCVDINVTATARIANLMKNSIK VMCTPSYNDEYVPHKDVSLPQRVPPLALTPAGNNITNRITLAFWRGLNNSDIRQKLLEAWENDLELFIQKGRKPSLEQGDLVHHEAFNNSKYCICPGGPE LDRTIALAIHYGCVPVIMSDYYDLPFKDILDWRKFSIILEESQVYYLREHLKEMLEHEYRAMQTNTVMVRKHFQWNLVPAKYDAFHMTMYDLWLRNHFTK YY*
PtGT47_27	Potri.007G117800.1	Chr7	13789882-13792710	CCYVQGKSEDERATAVEDFVKSIISQYPYRNRSLGADHFFISCADIDVTATARIANLMKNSIRLVCSPTYNHEYVPHKDVSL PQNVQPFDVSSAGNKSSERSEGYFYHNLNHSRFLTKDPEKAHLFFIPIYCHSMSPEEKSKKERAIAVQDFVKFLISKYPYWNRTLGADHFFVSCSEVDVA ATARIADRLKNSIGLMCSPSYNSKYVPHKDVSLPQSVQPYAYTEARNIEKNRTMLGFWSGVEDSYIRERLYLTWEYDSELYIEARDWPTSIEQGHWQARE DFYNSKFCICPGGPQLDGFIAFAIHYGCIPVILSDYYDLPFNDILDWRKFSVILKENDVYSLKKILQDIPKQTYESLQNHTFMVQKHFQWNLSPVKYDAF HMVMYDLWLRHHV…
PtGT47_28	Potri.007G118100.1	Chr7	13797775-13799325	MERSFEVFVYPHKTTACDKTRKIDGKYGSEGFFYQNLNQRRFLTRDPDKANLFLIPTSCHSLPAEGRSVDERAIAVQHFVNS LISEYPYWNRTLGADHFFITCADIHVIASERIWNLMKNSIRVMCSPSYNVEYVPHKDVSLPQSVQPFNVSVSQIMPPLYAFIAPTTQPLTLPAAKYNMKS RYRYLLCPWIILEQEYSFWRGLKENYIRKSLVNAWENDSELDIKEIQTEASTTEIRRLYHEKFYSSKFCICPGGPQIDGAIAVAIHYGCVPVIMSDYFDL PFNDILDWKKFSVILKESDVDGLKRILLNIPDQEYQVLQTNTVMVQDHFQWNLPPVRLDTFHMVMYELWLRRYVTKY*
PtGT47_29	Potri.008G034500.1	Chr8	1903259-1906518	MYGKAIVSLAFIILLLISFSLFIGTVDIRSYFFASPDGAHNLPCTPTHTQSSPSVPLKVYMYDLPRRFNIGMMQWKKGGGDD TPVRTAEELPRWPVNVGVRKQHSVEYWLMASLLGSGGEGEEREAVRVLDPEIAEAYFVPFFSSLSFNTHGRNMTDPETEKDRQLQVDLIDFLQKSKYWQR SGGRDHVIPMTHPNAFRFLRQLVNASILIVADFGRYPKSLSTLSKDVVSPYVHNVDSFKDDDLLDPFESRKTLLFFRGNTVRKDKGKVRAKLEKILAGYD DVRYERSSPTAEAIQASTQGMRSSKFCLHPAGDTPSSCRLFDAIVSHCVPVIVSDLIELPYEDEIDYSQFSIFFSINEAIQPDYLVNQLRKFPKDRWIEM WRQLKKISHHFEF…
PtGT47_30	Potri.008G060500.1	Chr8	3652684-3654227	MSTIIYFLCLSLLTSVSKSINDSTSLYLSPTIFFPNYQNMLNSFKIYIYTPSKPFSFSSPTESLFFTSLQASPFVTQNPEEA HLFFVPFASNLSTRSIARFIRDLRMEFPYWNRTLGADHFYVSCAGLGYESDRNLVELKKNSVQISCFPVPEGKFVPHKDISLPPLARITRASHAPGNRTV RYLVRHGGVKDSKLANELRNDSDFLMESEPSNEMTLVERLGSSMFCLFEDGADISGIGEALRFGCVPVMVTDRPMQDLPLMDVLSWQKIAVFVGSGGGIK EMKRVLDRTCKDDECEGTRRLGVAASQHFGWNEIPQPYDSFYMVVYQLWLRRHTIRYPRREFV*
PtGT47_31	Potri.008G060600.1	Chr8	3654591-3662864	MSTIIYFLCLSLLTSVSKSINDSTSLYLSPTIFFPNYQNMLNSFKIYIYTPSKPFSFSSP TESLFFTSLQASPFVTQNPEEAHLFFVPFASNLSTRSIARFIRDLRMEFPYWNRTLGADH FYVSCAGLGYESDRNLVELKKNSVQISCFPVPEGKFVPHKDISLPPLARITRASHAPGNR TVRYLVRHGGVKDSKLANELRNDSDFLMESEPSNEMTLVERLGSSMFCLFEDGADISGIG EALRFGCVPVMVTDRPMQDLPLMDVLSWQKIAVFVGSGGGIKEMKRVLDRTCDNNGSSKP TVTPYEEALDALSSLITKRSRADKSNNGDRFDVLFDYLKILELEEAISEMKIIHVAGTKG KGSTCTFTESILRNCGFRTGLFTSPHLIDVRER…
PtGT47_32	Potri.009G006500.1	Chr9	1204125-1206845	MVLEVKRPTMSNNRRGFYVRMKLLHRHAGLQQQEKKKNLCFKYYKWLLWFSLLLYFLSSCFFTHKPIPLSKTHVSESKTVVS RALFESSNSTFIQQSKNINRGLLKDLKVYIYELPSKYNTDWLANERCSNHLFASEVAIHKALSNSLDIRTFDPYEADFFFVPVYVSCNFSTVNGFPAIGH ARSLLSSAVQLISSNYPFWNRSQGSDHVFVASHDYGACFHAMEERAMEDGIPEFLKRSIILQTFGVKFNHPCQDVENVVIPPYISPERVRTTLENYPLNG RRDIWAFFRGKMEVHPKNISGRYYSKKVRTVIWRKYSGDRRFYLQRHRFAGYQSEIVRSVFCLCPLGWAPWSPRLVESVALGCVPVIIADGIRLPFPTAV RWSEISLTVAEKD…
PtGT47_33	Potri.009G032500.1	Chr9	4287250-4288977	MDTKATGNPVDNFFTGGDWDKYLREVSNAGKESKPENQIHLTENEARSINKVFGEGNREESGNARSTARENQVKKPFDHSLP REARRRRVKKPAREKRVKKQVDHSLPREEKVIEEVIEQPNKEDQIRRQTNSDSHPESCVGRYIYIHNLPSRFNGDLVRHCQSLNEWSNMCPYLSNFGFGP RLKNSERTLSNTGWYDTNQFMLEIIFHHKMKQYKCLTNDSSLASAIFVPYYSGLDVARYLWNADKKMKDYYSRHLVRWLRESPEWKRLWGSDHFMVAGRI TWDFRRLTNNNNDWGNQLMILPESRNMTVLTIESSPWNNNDFAVPYPTYFHPSSDNEVFQWQNRMRRLKRQFLFSFAGGPRPDLPDSIRSDIIEQCQAAR EKCLLLECITGSS…
PtGT47_34	Potri.010G197900.1	Chr10	19064235-19065546	MSTFIYFLCLSLLTSVSKSMIDSTSLYLSPTILFPDYQNMLISFKIYIYTPPNALSFSSPTESNFFTCLQNSPFVTQNPEEA HLYFVPFSSNLSTRSVARFIRDLRMEFPYWNRTLGADHFYVSCAGLGYESDRNLVELKKNSVQISCFPTTEGRFVPHKDITFPPHAQGNRTAKYLGFVRY NGVKESNLVNELRNDSNGMTLVGRLGSSVFCLFEYGADVSGIGEALRFGCVPVMVMDRPMQDLPLMDVIGWQKIAIFVGSRGGVKEVKRVLDRTCKDDEC AGRRRLGVVASQHFVWNHMPQPYDSFHMVMYQLWLRRHAIRYARREFV*
PtGT47_35	Potri.012G091600.1	Chr12	11860755-11862372	MEKDFKVFVYPGGNPGTCYHSTNNTLKSNHASEHYFFMNLRDSPFLTKNPQEAHLFFIFI SCLPLSDEEPLPGYRERVIKRYVKGLISTYPYWNRTLGADHFFVSCHNIGSTATKEIPFL LKNAIRLVCSPSYDSNYIPQKDVALPQILELSLPPDGDDMWNRSTVESRPLLLSQEMINP PRTKLGFWAGSPNIAHFFSSNPHISLM
PtGT47_36	Potri.012G109200.1	Chr12	13200704-13204887	MEIWKWVFVGVLWYAGFVLSTGAVELGRSQHTERISGSAGDVLEDDPVGRLKVFVYELPRKYNKKILQKDPRCLTHMFAAEI FMHRFLLSSPVRTLNPDEADWFYTPVYTTCDLTTNGLPLPFKSPRMMRSAIQLISSNWPYWNRTEGADHFFVVPHDFGACFHYQRRLLKEEFFPCSNVCL KDGSITVPPYAPPQKMQTHLIPEKTPRSIFVYFRGLFYDVGNDPEGGYYARGARAAVWENFKDNPLFDISTEHPATYYEDMQRAVFCLCPLGWAPWSPRL VEAVIFGCIPVIIADDIVLPFADAIPWEEIGVYVDEEDVPNLDTILTSIPPEVILRKQRLLANPSMKQAMLFPQPAQPGDAFHQVLNGLARKLPHDRSVY LRPGEKILNWTAG…
PtGT47_37	Potri.012G109600.1	Chr12	13218346-13222712	MEIWKWVFVGVLWYAGFVLSTGAVELGRSQHTERISGSAGDVLEDDPVGRLKVFVYELPR KYNKKILQKDPRCLTHMFAAEIFMHRFLLSSPVRTLNPDEADWFYTPVYTTCDLTTNGLP LPFKSPRMMRSAIQLISSNWPYWNRTEGADHFFVVPHDFGACFHYQEEKAIERGILPLLQ RATLVQTFGQRNHVCLKDGSILPLLQRATLVQTFGQRNHVCLKDGSITVPPYAPPQKMQT HLIPEKTPRSIFVYFRGLFYDVGNDPEGGYYARGARAAVWENFKDNPLFDISTEHPATYY EDMQRAVFCLCPLGWAPWSPRLVEAVIFGCIPVIIADDIVLPFADAIPWEEIGVYVDEED VPNLDTILTSIPPEVILRKQRLLANPSMKQAML…
PtGT47_38	Potri.012G124600.1	Chr12	14354997-14358305	MIEKLLKTKKPKSPNSSKFPQIMTRKSSLLKRTLILSAFTVLIIYVSFNTFLSYFTTTATAGVSATTSSIFAEQISRENFQD FPVKATGNERKVRVFMHDLPKKFTTGIIENHGLARGHSNLSKVSYPGHQHMGEWYLYSDLSRPESDRVGSPVVKVNDPEEADLFYVPVFSSLSLTVNPVQ VGKVPVSDPVYSDEKMQDELVEWLEKQEYWRRNNGRDHVLFAGDPNALYRVLDRVKNAVLLLSDFGRVRSDQGSLVKDVIVPYAHRINVYNGDIGVDERK TLLFFMGNRYRKDGGKIRDMLFQLLEKEEDVLISHGTQSRESRRTATLGMHTSKFCLNPAGDTPSACRLFDSIVSLCVPLIVSDSIELPFEDVIDYRKIA IFVDTESSLKPGY…
PtGT47_39	Potri.012G130700.1	Chr12	14743865-14746532	MKTKIKLKFGQWRQIRGVPVDDEASVFHVLVAQLLNLLTVPSVTFFNQRSYLTRAHPQPPLSLRDITNIKNTTPLDTLFHLS SPPPFFPASRKSKILRMFPLSNPSSSPESQIKKPKTPLDVRRKDSFKSPKAFLAAHYPSINQPRLCLFLSIFFIQILLLLALRSIPRSFHHRLHHFPAPV TAHHHLTPILTTTTASFSASTVKEENSCEFGEIFVYDLPSALNHEVVNNCDELNPWSSSCDALSNNGFGPVAAAISSVVPENLAAAWYWTDQFVTEVLFH NRILNHKCRTKDPNNATAFYIPFYVGLAVGKFLWLKNSSAKERDFHCEMMLKWVQDQPYFTRNDGWDHFLTMGRISWDFRRSKDEEWGSSCIHKPGMRNV TRLLIERNPWDYF…
PtGT47_40	Potri.013G067400.1	Chr13	5391476-5394803	MAEKHSSSSLGVVSRKSMFCLFSFVSALFILSWFFMLRSTVSAGFIDLSLLPHPKLNSVIDNGNSASWNRNDVEPSIGNRAR AIPVDIEGDGGEEKPQEKDDLGDVKCNSFDNNCNQVLKVFMYDLPSEFHFGLLDWKPQGGSVWPDLRAKVPAYPGGLNLQHSIEYWLTMDLLASEIPGIP RAGSAVRVQNSSEADVIFVPFFSSISYNRYSKVNPHQKKSKNKSLEEKLVKFVTSQKEWKRSGGRDHIILAHHPNSMLYARMKLWTAMFILADFGRYSPN IANVGKDVIAPYKHVIKSYANDSSNFDSRPTLLYFQGAIYRKDGGFARQELFYALKDEKDVHFQFGSVQKDGVSKASQGMHSSKFCLNIAGDTPSSNRLF DAIASHCVPVIIS…
PtGT47_41	Potri.013G116200.1	Chr13	12976652-12979494	MPPPPPKTTTTTTTPLPCSNPTLFLAFTLLTFLSLSLFFISNKISSFPNPQNTLQISQAFIKVYVADLPRSLNYGLLDQYWS SSMPDARISSDPDHQIRPRPIKNLKFPDYPENPLIKQYSAEYWITGDLMTSEKLKSRSFAKRVFDFNEADVVFVPFFATLSAEMELAKGKGSFRRKEGNE DYQRQKEVVDFVRNSEAWKRSGGKDHVFVLTDPVAMWHVRAEIAPAILLVVDFGGWYRLDSKSSNGSSSDMIRHTQVSLLKDVIVPYTHLLPRFQFSENK KRNTLLYFKGAKHRHRGGIVRENLWDLLVNEPGVIMEEGFPNATGRELSIRGMRTSEFCLHPAGDTPTSCRLFDAIQSLCIPVIVSDNIELPFEGILDYT EFSVFVAGDDALK…
PtGT47_42	Potri.014G147800.1	Chr14	11295196-11296669	MFNQNASPDPLVDTDNPFIDVIESLDHANNLAVNKNTTLAARTKRPADSCEGRYIYVHHLPRRFNDDVLKNCSVLVKWLDMC PFLKNSGFGPQVENSEGVLSEKSWFTTNQFLLEVMFHERMKKYKCLTNNSSFANAIYVPFYAGLDAGRYLWGYNISMRDSLGSDLVKWLAQQPEWKRMWG RDHFFVLGRIGWDFRRQTDHDSDWGSKLMTLPESMNLTALSIETTSWSNEFAIPYPTYFHPSSDDEVFQWQNRMQSHNRRYLFAFAGAPRPSANDSIRKE IIHQCLASRRTCNFLRCNSGGESRCDNPAEVIKVFQDSVFCLQPPGDSYTRRSIFDSILAGCIPVFFHPFSAYAQYTWHLQRDYWRYSVFIPIDLVKDGF VSIKQVLLQISDN…
PtGT47_43	Potri.014G170900.1	Chr14	13773213-13774835	MRGGNRSDAKLERVEAGLAMARALIREAAEDNNCTSSLHDDLDYIPRGYIYRNACAFHRSYLLMEKLFKIFVYEEGEPPLFH YGTCKDIYSMEGVFLSLMETNTKFRTSNPDEAHVYFLPFSVVMIIEHLFHPIIRDKAVLERTVSDYVRIISHKYLYWNRSLGADHFMLSCHDWGPRATWY VRQLYYNSIRVLCNANTSEYFNPKKDASFPEINLKTGEITGLTGGLPPSNRTVLAFFAGKMHGKLRPALLQHWMGKDKDVQVYETLPQGISYHEMMKKSK YCICPSGHEVASPRIAEAIYAECVPVLISQHYIFPFSDVLNWDSFTIQVPVTEIPNLKNILEGIPEDQYLRMQERVRQVQRHFVVNNPPRRYDVFHMIIH SIWLRRLNVRFPG*
PtGT47_44	Potri.014G171100.1	Chr14	13792095-13793971	MRRYPNSKSLFSSSSLSLGSSPFLVLLVVLPLIVIPVFIFTSCLKTSSWSKYSMPSPLTWRVGFFDNSYTFASFAQSEASVV GYNTSTLNSLYPDDQATSSLRESNDEGAVARGVVKRHSKLEKMEANLAKIRSSIREAARVRNLTSIYEDPDYVPKGPIYRNANAFHRSYLEMEKLFKIYI YKEGDPPMFHDGPCKSIYSSEGRFIHELEKGKSFTTTDPDEALVYFLPFSVVMLVQYLYVPGSHEIDAIGNTVVDYINVIADKYPFWNRSLGADHFILSC HDWGPRTSSYVPHLFNNSIRVLCNANTSEGFNPKKDASFPEIHLRTGEITGLVGGPSPSRRSILAFFAGRLHGHIRRLLLEQWKDKDQDVQVHDQLRNGM SYDSMLKNSRFCL…
PtGT47_45	Potri.015G087900.1	Chr15	11062723-11065555	MPPLKALAALVIFLGIASILLQQRYWLPLSSKGKSTLYGLQQSTAGVHHSEEFFLLNYEAMEKDLKVFVYPGGNPKTCYHSI DKKLKSNYASEHYFFMNLRNGSFLTENPDEAHLFFIPLSCQPMEDQDALPRYKEMVIQNYVRALTIKYPYWNRTLGADHFFVSCHGIGNRATAAFPFLLK NAIRLVCSPSYDSNYIPHKDVSLPQILELSFPPEGDGMWNDSTMESLPIQLSPVETHPSRTKLCFWAGSPNSEVRKNLRVHYKGLEEFEIHFVENVKRAL VLDTFQKEIHRSKFCICPRGKTQVGGVCLAESMAFGCVPVIMSDYYDLPFNDILDWNAFSVILKEHDVPIMGEILKGIPEDMFEKMRQNVLKVSKYFKWH FRPVKYDEFHMVM…
PtGT47_46	Potri.015G107200.1	Chr15	12475912-12478923	MDDQAFGFISSNWPYWNRTEGADHFFVVPHDFGACFHYQEEKAIKRGILPLLQRATLVQT FGQRNHVCLRDGFITVPPYAPPQKMQTHLIPEKTPETCNELFSICAPLAGPLSPRLVKVV IFGYIAIIIADDIVLPFADAIPWEEIEVFVDEKDVPNLDTILTSIPPEVILRKQRLIANP SMKQAMLFP*
PtGT47_47	Potri.015G116700.1	Chr15	13203164-13204817	TPRCLTHMFAAEICMHRFLLSSPVRTLNPKEGDWFYTPVYTTCDLTLNSLYLPFKSPRMIRSATQLISSNWPYWNRTEGADH FFVVPHDFGACFHYQEEKAIERGILPLLQHATLVQTFGQRNHVCLKDGSITVPSYAPPQKMQTHLIPEKTPRSIFVYFRGLFYDVGNDPEGGYYARGARA AVWENFKDNPLFDISTEHPTTYYEDMQQAVFCLCPLSWAPWSPRLVEALIFGYIPVIIVDDIVLPFADAIPWEEIGVFVDEKDVPNLDTILTSIPPEVIL RKQRLLANPSMKQAMLFPQLAQAGDAFHQVLNGLARKLSHDRNVYLKSGEKILNWTAGLVGDLKP*
PtGT47_48	Potri.015G124800.1	Chr15	13834878-13838512	MSERLKIRTPKSPNSSKLPRIMARKSSLLKQTLIFSACTILIIYAFFNTFLSSSTAAATTGISATTSSLFAEQISRENLLEF PEKATENEKKVRVFMYDLPKKFTTGTIENHALARGSSDLSKVSYPGHQHMGEWYMYLDLSRPDLDRVGSPVVKVNDPEEADLFYVPVFSSLSLIVNPARA GTVPGSDPVYSDEKMQEELVEWLEEQEYWRRNNGRDHVVFAGDPNALYRVLDRVKNAVLLLSDFGRVRSDQGSLIKDVIVPYSHRINVYNGDIGVEERKT LLFFMGNRYRKDGGKIRDLLFQMLEKEEDVVIRHGTQSRENRRTATRGMHTSKFCLNPAGDTPSACRLFDSIVSLCVPLIVSDSIELPFEDVIDYRKIAI FVDTESSLKPGYL…
PtGT47_49	Potri.015G132600.1	Chr15	14292512-14295110	MLLPLSNASSSPEPQIKKPKTPPDFQRKDSFKSPKAFLAAHYPSFNQPRICLFLSVFFIQILLLIAFRSLPLSSHHRRQHFP SPFSTRHHQHLNQTVTTITTATTAPSTVKEESSCEFGKIFVYNLPSALNKELVSNCDELNPWSSSCAALSNDGFGPVATGISSVVPENLSPAWYWTDQFV TEILVHNRILNHKCRTQDPNNATAFYIPFYAGLAVGKSLFFKNSSAKERDFHCEMMLKWVQDQPYFQRNEGWDHFMTMGRISWDFRRSKDKDWGSSCIYK PGMRNITRLLIERNPWDYFDVGVPYPTGFHPRRDNDVVQWQDFVRNRNRKNLFCFAGAKRSKFNNDFRGLLSNHCRNESDSCRVVDCAGSKCSNGTSLIL ETFLDSAFCLQPR…
PtGT47_50	Potri.018G025200.1	Chr18	2004968-2006336	MEKRFRVWTYREGEQPLFHRGPMNDIYSIEGQIIDELDSGKSPFSAKNPDEALAFFVPVSIASILHFIYRPYVTYSRKQIQD IAEDYIDLISSKYPYWNRSSGADHFMISCHDWAPDVSAANPDLYRNFIRVLCNANSSEGFKPARDVSLPEFKLPRGKLEPEHILQPCDNNRSILAFFAGG SHGSVRKILFKHWKEKDNDIQVYKYLPETLNYTEQMSKSRYCLCPSGWEVASPRVVEAIYSGCVPVIISDYYVLPFSDVLDWIKFSVHIPVSGIPEIKTI LQSIPVEEYLEKQKRVLQVQQHFKLHRPAKPFDVVHMVMHSVWLRRLNIRLPR*
PtGT47_51	Potri.018G025400.1	Chr18	2013627-2014736	MEKRFKVHVYSEGELPIVHDGPCKDIYTIEGRFIHEMEHGAKRFKTRDPRRAHVYFMPFSVTWMVKYLYKPLTYDHTAMKQF VADYVRVVSSKYPFWNRTQGADHFMLSCHDWGPHASHGNPFLYNTSIRVLCNANSSEGFSPRKDVSLPEIHLYGGNVPPKLISPPPATSPRPYLAFFSGG LHGPIRPILLDHWKGRDPDLQVYEYLPKDLDYYSFMLRSKFCLCPSGHEVASPRIVEAIYAECVPVILSDHYVLPFSDVLRWEAFAIQVNVSEIPRLKEV LISVPEERYRRLKEGLRAIRKHFVLNQPAKRFDVFHMILHSIWLRRLNLRLV*
PtGT47_52	Potri.018G043700.1	Chr18	3790383-3794736	MGQEFRYPCTTEIGKLLWFIGVIVAVVLTFQHFELPYGNIISSLSSAQKDLGAGNGSLLPHGASSTHEMLSNVTQSNGLNYA AGGQETGDNHGTETPANVNNGVVSEGSRGMNESSLVDSRGEESSLDELVDTNTNSTLYVNNDVGSEGIKGLNKSLGIDNHGRESSPEQLLDQNENSTLEL NHSGNGSASIETDRSLFRENITSTSENTGTSQAGITPIAPALPPVDSPTNIAIPRNAEPSTLAPVVPVESNTSKTDKDASHGLENDGKAGEQLNNSTSLQ NNTSVTSVREVKKEPHTPSPAVISISEMNNLQLQSWSSPISRRPRWPSAVDQELLNAKSQIQKAPLVESDSMLYAPLYRNISMFKKSYELMEDILKVYIY KEGERPILHQAPL…
PtGT47_53	Potri.018G085400.1	Chr18	11220032-11223391	METSALFQRLCLVEIRRLLMVIGVAIIVIILFQCFALPYGKGWSVSSADEDSVVMLISNPILSNSSKSSIRVFHIMTNGSDS SDLGEEARDEDEIENTDADYELSSNKIEQNDVLLKLGEMLGKSTDNTSSQEKSIETGSKHLKQVGETEILEATTSSTFGGIQSNVGTVPSVLLGISKKNG ENRDRDSITSDSFFPTKVISLDHMETQTKNAELLQTISVTLNNNSTRDSISTLKRWEQSTSISQMNSLLLQSLVYSHSMKPRRLSVRDRELLSAKLEIEN APRVDNPPGLYASAFRNISMFKRSYELMERMLKVYVYKEGEKPIFHQSKMRGIYASEGWFMKLIEGNKKFVVRDPRKAHLFYLPFSPHMLRTALFDHNSL NQKELAEFLKNYV…
PtGT47_54	Potri.018G085500.1	Chr18	11225191-11230092	MELCFQLPKFFQNVNRRWLLVLGVVAVTHTLFQFLLLPYGNALRSLFPNVNDSMYDKSSFAVIQSSKKSVMVRYPLTVDKSS LNNYFKFDGVLENADDSNGGVEEGHDDGTKKNTEDTDHDFSSEEGDMEVLDDVIQLEVDRDLEDDFPSEDVKDRHETFASGGVKTEESNPVLKLANEARF NLPLERNVKSDHDIPTDNVLQQNKSQAHKEFEHVNSTLPVDSQAVASSTKATYLKSNGSSSIGPAALKSDSAAAKNYSVVLAKPGKKKMRCEMPPKSVTL IDEMNSILVRHRRSSRSMRPRWSSARDQEILAARSQIESAPAVVHDRDLYAPLFRNVSKFKRSYELMERTLKIYIYKDGKKPIFHLPILKGLYASEGWFM KLMQGNKHFVVKD…
PtGT47_55	Potri.018G124800.1	Chr18	14786337-14792168	MSGLRVLKRKGRENMDQTQKKEAAVVLDSCKSSGAIKKMKKDDESQSKGKKTCDLVSFWELPEYMKDNEFILSYYRADWPLK KALFSVFRWHNETLNVWTHLLGFFLFVGLTVANLMQGTTELLDLGHNLPMKTDVSSLGMPATRWPFYVFLGGSMFCLLSSSVCHLFSCHSHSLNILLLRM DYVGIVIMIITSFFPPMYYIFQCEPHWQFIYLGGITVMGMFTIVTLLSPPLSTGKFRAFRAMLFASMGLFGLIPAVHSVIANWSNPKRDTIVAYESAMAI FYLTGTGLYVSRFPERLKPGLFDLTGHSHQIFHVFVVLGALAHYGATLLFLEYRDLVGCEKRSSLERVEEGLSKARAAIQEAIRSKNYTSHKKETFIPKG SVYWNSHAFHQSH…
PtGT47_56	Potri.018G124900.1	Chr18	14794888-14797562	METICNGSNVGFMLLPVVVFASLIVYFGSPLNQNTNTVGYFSSFSTSNTVYTKANELVFESSQPSPSQPHQLPTQIKRGREK IEDGLARARAAILDAARLKNYTSYKEGTYIPKGVIYRNPYAFHQSHTEMEKRFKIWVYKEGERPLVHGGPLNNIYGVEGQFLDEMEHGKSPFAASHPDEA HMFLLPISVAYIISYVYKPIVTYSRDELQRLVQDYVGVVADKYPYWNRSKGADHFLVSCHDWAPDISGANPDLYKNFIRVLCNANTSERFEPRRDVSIPE INIPNGKLGPPHKGLPPSKRSIFAFFAGGAHGYIRKVLLENWKDKDDEIQVHEYLDKKGTDYFELMGQSKFCLCPSGYEVASPRVVTAIQLGCVPVTISD NYTLPFSDVLDWS…
PtGT47_57	Potri.018G125000.1	Chr18	14800300-14804865	MATFNSSAISFLLLSALVSTLFFLCLSPLNQTIRISTPLSSLYSPNYSIEEAKSNHTFERFQSFPSPTTAVGDEEISAPKDK EKISERLPPSPSPSPSPLPLPVHNSSAVSSLPSIPVITRHEKKKTDFERIEEGLAQARAAIYRAIRSQNSSSYKEGSYIPRGSMYRNQYAFHQSYTEMEK RFKVWVYKEGELPVVHGAPVNDIYSIEGQFLDEIESGKSPFIARHPDEAHAFFLPISVAYIIHYVYKPRITFARDQLQRLVTDYVRVVADKYTYWNRTQG ADHFSVSCHDWAPDVSRANPELFRYFVRVLCNANISEGFRPQRDVSIPEIFLPVGKLGPPREYTKPPSKRSILAFFAGGAHGHIRKVLLTHWKEKDDEVQ VHEYLTQRNKKNT…
PtGT47_58	Potri.019G036500.1	Chr19	4131839-4135281	MANTTWLLYYLTRRRFSPSFRSFFFIPTSLALFTSLFILFYISTTSTLFFSNQQPSIPHLNQPLLSGSSSIPQINISNSAQN PFVHVSNVNRLNENDRDGRESQRSLRPQFGSSDGIYVNNELFHDKDIFLEDYKQMNRSFKIYVYPHRRNDPFANVLLPVDFEPGGNYASESYFKKALMKS HFITKDPAKADLFFLPFSITRLRHDPRVGVGGIQDFIRDYILNISRKYPFWNRTGGADHFYAACHSIGRSAMEKSEEVKFNAIQVVCSSSYFLSGYIAHK DVSLPQIWPRQGDPPNLASSKRKKLAFFAGSINSPVRERLLHSWRNDSEIFAHFGRLTTPYADELLGSKFCLHVKGFEVNTARIGDSLYYGCVPVIIANH YDLPFADILNWKS…
PtGT47_59	Potri.019G044600.1	Chr19	5293132-5296166	MAEKHSSSSLGIISRKSMLCLFVFASALFMLSWFFLLRSTSSAGFNGLSLLPHPKLNPLIDNGNSASWNRKDVEPSIGNRAI LVDNEGEEEKPQKKDDLGDVKSSCFDNNHKQVLKIFMYDLPSEFHFGLLDLKPLGDSVWPDLRAKVPEYPGGLNLQHSIEYWLTLDLLASEVPGIPRAGS AVRVRNSSEADVIFVPFFSSLCYNRYSKVNPHQKKSKDKLLQEKLVKFLTSQKEWKRSGGRDHVLLAHHPNSMLDARVKLWPAIFILADFGRYPPNIANV AKDVIAPYKHVIRSYVNDSSNFDSRPTLLYFQGAIYRKDGGFARQELFYLLKDEKEVHFQFGSVQKDGVGKASQGMHSSKFCLNIAGDTPSSNRLFDAIA SHCVPVIISDDIE…
PtGT47_60	Potri.019G049800.1	Chr19	7440168-7454071	MANKQLHILSSRSRSPILLFTICLFAFSLLFLLFSLSTRHPSASPYPNTNPNLSLKPETSFVASLEHFLDHKYPTSSSSSSP FPTVSEEDVSRFDDQVFSKERDRFYREPYYPLDLPIRVYLYEMPSKFTYDLLWLFRNTYRNTDNLTSNGSPVHRLIEQHSVDYWLWADLIAPESERLLKS VVRVERQEDADLFYVPFFTTISFFLLEKQQCKALYREALKWVTDQPAWKRSEGRNHIFPIHHPWSFKSVRRYVKNAIWLLPDMDSTGNWYKPGQVFLEKD LILPYVPNVNLCDTKCISESESKRSTLLYFRGRLKRNAGGKIRAKLVAELSGAEGVFIEEGTAGEGGKAAAQIGMRKSIFCLSPAGDTPSSARLFDAIVS GCIPVVVSDELEL…
PtGT47_61	Potri.019G086800.1	Chr19	11884151-11887099	MPPPKTTTTTLPCSIPTLFLAFTTLSFLCFSLFFLYNKNPSFPNPQTTLQTSQNSIKVYVADLPRSLNYGLLDQYWSSSIPD TRISSDPDHQIRPKPTKNQKFLDYPENPLIKQYSAEYWITGDLMTPEKLKFRSFAKRVFDCNEADVVFVPFFATLSAEMELAKGKGSFRRKEGNEDYRRQ KQVVDIVRNSDAWKRSGGKDHVFVLTDPVAMWHLRAEIAPAILLVVDFGGWYRLDSKSSNGSSSDMIQHTQVSLLKDVIVPYTHLLPRLQLSENKKRSTL LYFKGAKHRHRGGIVREKLWDLLVNEPGVIIEEGFPNATGREQSIRGMRSSEFCLHPAGDTPSSCRLFDAIQSLCIPVVVSDNIELPFEGMVDYTEFAVF VAVDDALKPRWLV…
PtGT47_62	Potri.T071700.1	scaffold_76	155537-168065	MANKQPHILSSRSRSPILLFTICLFAFSLLFLLFSLSTRHPSASPYPNTNPNLSLKPETSFVASLEHFLDHKYPTSSSSSLFPTV SEEDVSRFDDQVFSQERDRFYREPYYPLDLPIRVYVYEMPSKFTYDLLWLFRNTYRNTDNLTSNGSPVHRLIEQHSVDYWLWADLIAPESERLLKSVVRV ERQEDADLFYVPFFTTISFFLLEKQQCKALYREALKWVTDQPAWKRSEGRNHIFPIHHPWSFKSVRRYVKNAIWLLPDMDSTGNWYKPGQVFLEKDLILP YVPNVNLCDTKCISESESKRSTLLYFRGRLKRNAGGKIRAKLVAELSGAEGVFIEEGTAGEGGKAAAQIGMRKSIFCLSPAGDTPSSARLFDAIVSGCIP VVVSDELELP…

## Sheet: Medicago truncatula
CAZy Family _Gene ID1	Model	Chl	Chromosome position	Protein sequence
MtGT47_1	Medtr1g006600.1	Chr1	51361-54977	MGGDFLSMFHLETKRLIWLIGITFSIILAFQYVEPNYGNVLLSLFSADRIPTSSESTDTNVTILNHANFTDELSIQKANATIDTV SITGFVLEPILSQNKSQEKVNSYSPSPENAPTNLSPPFGSTTNVGPNITTAVLSNDDNITNSIKNESFSPSSQNGGNVQDKSSSISSTVPKERQEIHVPI KEVTTVSEMNKLLLQSHASYRSMKPRWFSNVDQELLQARSEIENAPIVKNDPNLYGPIYHNVSMFKRSYELMEERLKVYVYREGARPILHSPFLTGIYAS EGWFMKLMEANKRFVTKNPKKAHLFYLPFSSRMLEEALYVKNSHSHKNLIQYLHDYVDMIAARHSFWNRTGGADHFLVGCHDWAPSETKLRLANCIRSLC NADVKEGFVF…
MtGT47_2	Medtr1g029350.1	Chr1	10041664-10048151	MLSSSTTNKSRTMHHHHQHQPLCTRTHQIGALILVAATFFFTRLLNAPCSFSSAVSQRKFVGVHPLLESEELTVKIYVYDENEID GLKELLKGRDGKITPEACLKGQWGSQVKIHKLLLESRYRTRKKEEADLFFVPSYVKCARMMGGLNDKEINHTYVKVISQMPYFRLSGGRNHIFVFPSGAG AHLFKSWATYINRSIILTPEGDRTDKRDTSAFNTWKDIIIPGNIEDGMTKAGSPMVQPLPLSKRKYLANYLGRAQGKAGRLQLIELSKQFPEKLECPDLK FSGGEKLGRKDYFEHLRNSKFCLAPRGESSWTLRFYESFFVECVPVILSDQIELPFQNVIDYSQISIKWPSSRIGPELLQYLESIPDKDIEAIIARGRQV RCMWVYASDS…
MtGT47_3	Medtr1g035730.1	Chr1	13051542-13053044	MFFRKSSPTQPLNSLPCTTKSQSFSKTKETHQWVKFTLFITLCLFLLYFMYPTTITTTTTTTDTTTTTTCDGSTPSFYIYNLPPR FNLDLLKNCENLNIYTNMCPHVKNNGLGQPLSKTSWYTTHQLLAEMIFHARLENHVCRTWDPNQAILFYIPFYGGLHASSMFREANHTLRDSLAVDLIDH VLSLPWWNRHNGKDHFISLGRTAWDFMRSSSGSDFGANILLNLPPVKNMSVLTIERQPWEGENQNGIPYPSYFHPKTKEEMLTWQNKMRQNDRPFLFSFI GGKRKGLGKAKIRDELFKQCNESSLCKLVDCGGGNSKCHQPMEVLSVMMESRFCLQAPGDSFTRRSTFDSILAGCIPVFFSPHTAYSQYHWYLPKYKNMY SVYIEEGGVG…
MtGT47_4	Medtr1g052730.1	Chr1	21687916-21695138	MARDLLDSFSMKTWRCSWSLAATIASALALVSVVHLFLFPLTPSLNYFNLASDSCISTNASAELISKRGWEWDEPAIDLKRQFLA DSHDSVSYKGAPWKAEIGRWLAGCDSITKEVNISEIIGGNDCKNDCSGQGVCNRELGQCRCFHGYAGDGCSDRLELECNFPGSPEEPFGRWVVSICPANC DKTRAMCFCGEGTKYPSRPLAETCGFQFNPPSEPGAPKIVNWTIVDQDVFTTNSSIQGWCNVDPAEAYTGKIKFKEECDCKYDGLWGRFCEVPVESVCIN QCSRHGHCRGGFCQCANGWYGADCSTPSVISSIREWPSWLRPARVDVPDNIHVSEKLINLNAVVAKKRPLIYIYDLPSEYNSLLLEGRHFKLECVNRIYD GNNATVWTEH…
MtGT47_5	Medtr1g061760.1	Chr1	26972832-26975642	MCNGERNCCVLRSGSKTSSSMKLFLSMVPLILVAVVGIVSILSPKERGEIVDLRSQAVQF EMNSSHIAFNHSSSTPFPVHPIHTLQQSNETEVLNISKPWLNSTVPLNETYVAHPRLKQQ RKFSILDRTEAGLLHARAAIREASYSTQTQDPDYVPIGPMYWNAKAFHRSYLEMEKQFKV FVYEEGEPPVFHNGPCKSIYSMEGNFIHAIELNDQFRTRDPQKAHVYFLPFSVVMLVRFV YLRDSRDFGPIRKTVTDYINVIAGKYPYWNRSLGADHFMLACHDWGPETSFSVPYLHKNS IRVLCNANTSERFNPAKDVSFPEINLQTGSINGFLGGLSASKRPILAFFAGGLHGHIRAI LLEHWENNKDQDMMIQKYLPKGVSYYEMLRKSK…
MtGT47_6	Medtr1g069460.1	Chr1	30077876-30080582	MQMRRRPVAGVLPDQMEKGGSKNQTSRLCCLASLSAFLWIFLLYFHFVFLRADNTTTTNTTQFVDDHITKSTPVSVNFDESTSNH DVIDKPRVKSSQPPPRKIGFPEPVAIKSDTPDPEKEEKKEEKKEEEKKEEKSFPFMKALKTGENKSDPCGGRYIYVHDLPSRFNEDMLKECKSLSLWTNM CKFTTNAGLGPPLENVEGVFSDTGWYATNQFAVDVIFSNRMKQYECLTEDSSIAAAIFVPFYAGFDIARYLWGYNISRRDAASLDLVDWLMKRPEWSIMN GKDHFLVAGRITWDFRRLSEEETDWGNKLLFLPAAKNMSMLVVESSPWNANDFGIPYPTYFHPAKDADVFNWQDRMRHLERKWLFSFAGAPRPDNAKSIR GQLIEQCRSS…
MtGT47_7	Medtr1g090733.1	Chr1	40749777-40753110	MGLSFYVRFRHLLPVLVCLVTILVFQSYWKTFSLLDLSSRFIGNNVTLQSNYSFQYEVENHEKEIHNFNQKILLDDSTQKVREFD EKHNIQHQRKGFPSKGTKGLNADWSIYHDNVKKSSNGSGIQSMEIDPQNKEKPQLLKTSLLGSSITMQPTSLTRLYSQLIQSFNSSSRKPKSSSQRDREL LAAKIEIENANVLLKSSGLHAPVYREVSKFSRSYELMERKLKVYIYREGEKPIFHQPKMRGIYASEGWFMKLMEGNKRFIVKDPKKAHLFYLPFSSQMLR ANLSDNKKMEQYLDKYVNIIAGKYRFWNRTGGADHFLVACHDWASRITRQPMKNCIRSLCNANVAKGFQIGKDTTLPATYIHSVMNPLRKIAGKHPSERT ILAFFAGSMH…
MtGT47_8	Medtr1g097090.2	Chr1	43770634-43775214	MPPIPKNNNNTSFSIPTLFLFFIIISILSLTFFFFSSYTTTTHSSLSLQPTTSCINVYVADLPRSLNYALLNRYWSFTSDSRIGS DVDSEIRSKSKALEFTEFPPYPENPIIKQYSAEYWIMGDLVTPSKLRTGSFAKRVFDEREADVVFVPFFATISAELQLGMAKGVFRKKVGNEDYQRQSEV VDFVKKTEAWNRSGGRDHVFVVTDPVAMWHVKDEIAPAILLVVDFGGWYRLDSKLSNCTSSEMIQHTQVSVIKDVIVPYTHLLPRLHLSENKERHNLLYF KGAKHRHRGGLVREKLWDLLNNEPSVIMEEGFPNATGREQSIQGMRTSEFCLHPAGDTPTSCRLFDAIQSLCIPVIVSDNIELPFEGMVDYTEFSVFVAV GDALKPSWIV…
MtGT47_9	Medtr1g102430.1	Chr1	46259279-46261027	MLPKSPPHSPESQPFKLSTTKTSFKTTFQSLFNLQNPRAWIFLIFVFIQILLFFNLRRFPASIPAPHHNFPTRLAVVDGGRRIQN YTVLDSIPTINSDECSSGRIFVYDLPKFFNQEILDNCDNLNPWSSRCNALSNDGLGEIATGLAGIVPENLLPSWYWTDQFVSEIIFHNRMLNHKCRTMEP ESAAGFYVPFYVGLAVGKYLWMNTSTAKDRDSHCEKMLIWLNEQPYYKESNGWDHFITMGRITWDFRRSKDEDWGSSCIYKPGLRNITRLLIERNPWDYF DIGIPYPTGFHPSSFSDITRWQSFVRNRRRKSLFCFAGAPRRSFRNDFRAVLLNQCRNSGGSCHAVDCGGSKCANGTSAITETFLDSDFCLQPRGDSFTR RSIFDCMVAG…
MtGT47_10	Medtr2g084245.1	Chr2	35414812-35417914	MLELKTPLKNKGFYVRMKLMNKHNTKPQQDHHKTFFFFTYYKWLLWFSLSLYFFTSYLITNDPQDITTIVSNSNSNVVSHNSLDM LKNLKVFVYELPSKYNNDWLVNGRCKTHLFASEVAIHTALLKSDVRTFDPYEADFFFVPVYVSCNFSTVNGFPAIGHARALISSAVELVSTEYPFWNRSR GSDHVFVASHDFGACFHTLEDKAMGDGIPQILKNSIVLQTFGVEYEHPCQDVENVVIPPYVSPEKVSRTLEKAPMNGRRDIWAFFRGKMEVHPKNVSGRY YSKRVRTEIWRKFNGDRRFYLQRHRFAGYQMEIARSVFCLCPLGWAPWSPRLVESVALGCVPVIIADGIRLPFSSIVKWPEISLTVAEKDVGKLDKILKH VAATNLTQIQ…
MtGT47_11	Medtr3g007840.1	Chr3	1210347-1211656	MNNAKQEDEVFKKLPQKIVDPCLSQYIYIYDLPARFNVDLLKGCHSLQKWENMCVFLSNLGVGLEIIEKSKKEVLSKNSWYATNQ YSLEVIFHNIMKHYKCLTNDSSLASAAYVPFYAGLDAAQQSQWKRLHGKDHFMVGGRIGCDFWREGDLDHNWGTKLMFLPEVSNMSFLLIESCKCLYDNE FPIPYPTYFHATNDDEIFKWQRKMRNKKRDYLFTFVGAPRPDSPSSIRNQLIEHCESSKSCKRVGCYHGSSKKKSCRDPVQVMDNFQNSVFCLQPPGDSF TRRSIFDSILAGCIPVFLHPLSAYKQYLWHFPKNGSGYSLFIPEIDVKEGKVMINETFFNVSKSEVLAMREEVIRLIPRIVYRYPGSRLETIEDAFDIAV KGVLGRIEAM…
MtGT47_12	Medtr3g037720.1	Chr3	13868465-13873350	MSEKSSMLPSRFIFYVMLICMFLLVLSSIFLVQFSSHSFIPRSVLELIIVNNSSFYFTPNFKKEQIILPTLPSEDLKFQTLKPRE SDWKVSDSSEKGMSVGKQVNVVCDPTKALLKVFMYDLPPEFHFGLLGWKGSVNQTWPEVDNPSRVPRYPGGLNLQHSIEYWLTLDLLSSNTKKHGQPCTA VRVRNSSQADIIFVPFFSSLSYNRHSKIQGEGQVSVNKMLQDRLVIFLKGRKEWKRSGGKNHLIVAHHPNSLLDARSKLASAMLVLADFGRYPVELANIK KDIIAPYRHLVATIPRGESPSYGERSTLVYFQGAIYRKDGGVIRQELYYLLKDEKDVHFTFGSIGGNGVNQASQGMSMSKFCLNIAGDTPSSNRLFDAIV SHCVPVIISD…
MtGT47_13	Medtr3g080690.1	Chr3	36514309-36516546	MYSSTPHYSLNYQRVQKKHSGSTLSSYKEDEGRYNSMANNGELNLDNKLPIRRSMQGDKNLEKVEGSLAKARALIKQALLRTNDT VVPLEDSHDYVPQGHIYRNAFAFHRSYQLMEKLFKIFVYEEGEPPLFHYGPCKNIYSMEGIFINLLENNTLFRTQNPNEAHVYFLPFSVVMILEHLFHPV IRDKAVLGRTIGDYVHIISHKYAYWNRSYGADHFMLSCHDWGPRATWYVKELYFIAIRVLCNANISEHFNPKKDASFPEINLVSGETTGLLGGYPTWNRT ILAFFAGQMNGRIRPVLFQHWKNKDKDVLVYEKLPEKISYHETMKMSKYCICPSGWEVASPRIVEAIYAECVPILISQQYVLPFSDVLNWDSFSVQIEVS EIPKLKEILL…
MtGT47_14	Medtr3g081240.1	Chr3	36804685-36806918	MYVSTPHYSLNFQRIQKKHSGSTLSSYKEDEGRYKPMAYNGELNLGNKLPIRRSMQEDRNLEKVEGSLAKARALIKQALLRTNDT VLALPLEDSHDFVPQGDIYRNAFAFHRSYHLMEKLFKIFVYEEGEPPLFHYGPCKNIYSMEGIFINLLENNTLFRTRNPNEAHAYFLPFSVVMILEHLFH PVIRDKAVLGRTIGDYVHIISHKYAYWNRSYGADHFMLSCHDWGPRATWYVKELYFIAIRVLCNANISEHFNPKKDASFPEINLVTGETAGLLGGYPTWN RTILAFFAGKMHGKIRPVLFQHWKNKDKDVLVYEKLPEKISYHETMKMSKYCICPSGWEVASPRIVEAIYAECVPIIISQQYVLPFSDVLDWDSFSVKIE VSEIPKLKDI…
MtGT47_15	Medtr3g084400.1	Chr3	38101429-38103020	MEKTPMISRSCNNHHQLWFAILISFLLCSLLVLCFDYSHTFQTPNNILNFSLNKKPNTFVSDSCTGRYVFIQNLPSRFNQYLLQN CQFLTRGTDKPNMCPYMDNMGLGPEVKNQNFKDILVPNNTWYATNQFLLEVIFHNRMKSYECLTNDSSLASAVFVPSYIGLDISRFLWVNNLTVRDSSGF ELVNWLVEKPEWKKMWGRDHFLISGRISWDFRRQFDDLAYWGSKFRFLPQSMNMSMLAVEGSSWNNDYAIPYPTSFHPSMDNDVLQWQSKIRHQKREFLF TFTGAPRPENEDSIRGKIIEQCRGSRFCKFIDCSYGGEKCDDPVNVMKVFGNSVFSLQPSGDSYTRRSIFDSILAGCIPVFFHPGTAYSQYKWHLPRNRT KYSVYIPVKD…
MtGT47_16	Medtr3g085480.1	Chr3	38625185-38627463	MLGKVVIFFTLALLIFIPCSILIGTLDIRSYYQQSPSIIATTPCADEAPLRVYMYDLPRRFNVGMLDGRNTTEAPVTIADYPLWP DNQGLRRQHSVEYWMMGSLLNGGGNGSEAVRVLDPEVVDVYFVPFFSSLSFNTHGHHMRDPETEIDHQLQIDLMGLLGQSKYWQRSGGRDHIFPMTHPNA FRFLRDQLNESIQVVVDFGRYPKGVSNLNKDVVSPYVHFVDSYVDDEPHDPFESRTTLLFFRGGTHRKDKGIVRAKFTKILAGFDDVHYERSSATGENIK LSSKGMRSSKFCLHPAGDTPSSCRLFDAIVSHCVPVIVSDKIELPFENEIDYSQFSLFFSFKEALEPGYMINQLRSFPKQNWTEMWRQLKNISHHYEFHY PPEREDAVNM…
MtGT47_17	Medtr3g097310.1	Chr3	44627741-44629522	MKASSTCSSQFLALFLALALTALVLVSSWIHSPNFSSFLGSWSWKAKQPTSLDIEIDRASTNEGEPPSSSAFPLQTFAPYDSHDG EKLDTNFKHKGTDKVNVRDHKYSKLEKIESKLAKARYSIKEASKVQNLTSTHQDQDYVPQGPIYRNPNAFHRSYLEMEKVFKIFVYEEGEPPLFHNGLSK DIYSTEGIFINEMEKGRYYRTNDPNEAFVYFLPFSVVMMVEYLYVGGSNDKTPIGVTVKDYIHVISHKYPFWNQSLGHDHFMLSCHDWGPDASAYEDNLF NNSIRVLCNANTSEGFKPAKDASFPEMFLKKGEITNLVGGYSPSRRTILAFFAGHLHGYIRYLLLDTWKNKDQDVQVYEELPDEDSYHTKLRSSKFCLCP SGYEVASPRI…
MtGT47_18	Medtr3g106690.1	Chr3	49301018-49302806	MESFTVEFKSHFGRIYVNIKHPSLHALKYYDVTGLNEFSIAILEALTAHSYYYRSYLEMEKIFKVYVYPDGDLPIVHDGPCKDIY STEGRFLHEMERGVGKFRTNDPNAAHVYFLPFSVTWMVKYLYTPSSYDITPLTQFVSDYVRVVSMRYPFWNRTHGADHFMLACHDWGPHASKGNPFLYNT SIRVLCNANTSEGFNPLKDVSLPEIHLYGGEVSPKLLSLPPENAPRRYLAFFAGGMHGPIRPILLQHWKNRDKDILVNEYLPKGIDYYSIMLSSKFCLCP SGFEVASPRIVESIYAECVPVILSNYYVLPFSDVLQWEAFSVQVDVSDIPRLKEILSAIPESKYKKLKQGVRAVRRHFTLNQPAKRFDVFHMILHSIWLR RLNIKLIS*
MtGT47_19	Medtr3g110198.2	Chr3	51204718-51208538	MGQQVFSLFHLERNKLLSIIGITFALILAFQYFELPYGNILVPTSNLRSSSSSSSSSSILQPAYSPSASEIYNNITLLNQTNSEH PLDKVNETRLYEENDTISRTVIGMNLSREVNNSYHNLHPLSPAIAPTYLTPPPAASPLTKVLSNDSEITDSMNDERFKPLKDDVNVMNHNSSIVTVPKVT TSSLIKVPEVTSISDMDKLLLQSHASYRSMRPRWSSAVDQELLLARSEIENVPVVTDVGNLYAPLFHNVSMFKRSYELMEKTLKVYVYREGSKPIMHSPY LLGIYASEGWFMRLMEANKAFVTKDAKKAHLFYLPFSSRRLEEALYDSNSHSHRNLMQYLNNYVDTIARKHSFWNRTGGADHFLVACHDWAPSETKQRMS KCIRSLCNAD…
MtGT47_20	Medtr3g110200.1	Chr3	51209234-51212207	MDLGYFRFLCLAETRRLVSLLGIIVALILVLQFSELPNTKFFSSLTARIKSFTLDTPLVNSTIGDNNVKLNASNSNSTNPLQNIA ISPQASSLDQVTNSEKSKQIETVVGFRNDGSPMGSVDGKDVNLTSQGNQSSLLAPQPMIPLSNGTFFDSKMYPKDGILEALQANYNATKGNDKLMISKNS KKKPSKIVAISEMNLMLQRNHASSQRPKPASSSAINVEIMKVKSEIENAPTIMNDSRLYSPLYRNVSMFRRSYELMEKMLKVYIYADGDRPIFHEPLLEG IYASEGWFMKLMEGNKQFTTEDPEKAHLFYIPFSSRLLQLTLYVRNSHKRSNLIDFMKNHVDMIAGKYPFWNRTNGSDHFVVACHDWAPAETRGRMLNCI RALCNADTEV…
MtGT47_21	Medtr4g057500.1	Chr4	21055428-21057903	MDQNHKKKPSKNKGYYVKMKLMHKHGIRPQQQEKNHFHKYYKWILWLSLSLYFFTSYLISNNNNHNHNNNIKHHQITSTIKSLSQ SLSIKKTTSSPQTLQKTSLKNLKIFVYDLPPKYNKNWLKNPRCKTHLFASEVAIHRALLTSDVRTFDPYEADFFFVPVYVSCNFSTVNGFPAIGHARSLI SSAVKLISTEYPFWNRSTGSDHVFVASHDFGSCFHTLEDVAMKDGVPEIMKNSIVLQTFGVTYDHPCQKVEHVVIPPFVSPESVRNTLENFPVNGRRDIW VFFRGKMEVHPKNVSGRFYSKKVRTVIWKKFNGDRRFYLRRHRFAGYQSEIARSVFCLCPLGWAPWSPRLVESVALGCVPVIIADSIRLPFSSAVNWPEI SVTVAEKDVW…
MtGT47_22	Medtr4g077920.1	Chr4	29926786-29932538	MAGKQISRSKSRIILLSLSLLGFSLLIFLSSLSPLRTTSPSSTHFHLPTTSHTSFVTSLEHFLKTHPSPSLPDDTPHKPLTDQHV TNLDNSVFHSETNRLNSDPFYPISLPLKVYVYNMPNKFTYDLLLLFRNTYRDTSNLTSNGSPVHRLIEQHSIDYWLWADLIAPESERLLKSVVRVHRQEE ADFFYIPFFTTISFFLLEKQQCKALYREALKWITDQPAWKRSGGRDHILPVHHPWSFKTVRRYVKKAIWLLPDMDSTGNWYKPGQVYLEKDLILPYVANV DFCDATCLSEINPKRNTLLFFRGRLKRNAGGKIRSKLVDQLRGADGVVIEEGTSGEGGKEAAQNGMRKSLFCLNPAGDTPSSARLFDAIVSGCIPVIVSD ELELPFEGIL…
MtGT47_23	Medtr4g084200.3	Chr4	32816494-32819588	MPYTKNMDEEETTKNKGKKPKHTFQTLFSTMTRKPVFKQTLIIFFVLLLLYALFNTFFQPTDSSTFDSSTFSFNSATSSVLLSSA ASKSPAVKVYLYDLPKRFTYGVIHHHSLARGSRANTDEKDVTSFKYPGHQHMAEWYLFSDLSRPDSERSGSPVVRVSDPEEADLFFVPFFSSLSLIVNPV RPAGSGSVPEKTAYSDEENQEALMEWLEMQEFWKRSKGRDHVIVASDPNAMYRVVDRVKNCVLLVSDFGRLRPDQGSLVKDVIVPYSHRIRTYDGGIGVD KRNTLLFFMGNRYRKEGGKIRDTLFQILEKEDDVIIKHGAQSRESRRAASQGMHTSKFCLHPAGDTPSACRLFDAIVSLCVPVIVSDSIELPFEDTIDYR KIAVFVETAA…
MtGT47_24	Medtr4g100730.1	Chr4	41550609-41546299	MKKVFHLTVIILMRELSWRCFRHKIDWRRLFLLVSIFTASGFVFQMIVHTSVISPNKHFHFPPGAADSYKSSNSTIQSNEFIKET ILQNVHLTLPNSAVSPKLSNNFVQSVSVEADSINTEARRKKDRNLANTSTTVTTSFPRGRVPSGKQTDIRLITPTEALVYARKEIDHVTSVNEDPDLYAP LFRNVSVFKRSYELMETVLKVYIYRDGSRPIFHNPSLKGIYASEGWFMKLMQENKQFVTKDPERAHLFYLPYSARQMEVTLYVPGSHDLKPLSIFLRDYV NKIAAKYPFWNRTHGSDHFLVACHDWGPYTVTEHEELARNTLKALCNADLSERIFIEGRDVSLPETTIRAPRRPLRYLGGNRASLRPILAFFAGSMHGRV RPTLLKYWGG…
MtGT47_25	Medtr4g115460.1	Chr4	47707773-47704957	MAATLIMNYSWLVFPVTLFIIIFFVYYQNDLLLLLPTINLPPPTNNLKTLEAAAAAAPAPLSSSVGHTIIKRGKNGLVRIEQELG EARAAIRRAIKRRNFTITSEIQDFVPRGCVYRNAFAFHQSHKEMLKRFKVWTYKEGEPPLVHDGPMSSIYGIEGHFMTEIENRLSPFSTHNPDEAHVFML PLSVTNMVHYLYNPLTTYSRDQIMHVTIDYTNIIAHKYRYWNRSKGADHLLVSCHDWAPEISRESSGKELFKNLIKVLCNANTSEGFDPKRDVSMPEMNL QGYKLSSPIPSKESNNRSILAFFAGGEHGMIRKTLLDQWKGKDKEVLVYEYLPKKLKYFKLMGKSKFCLCPSGYEVASPRLVESINTGCVPVIVSDNYQL PFSDVLDWSK…
MtGT47_26	Medtr4g115530.3	Chr4	47726861-47725488	MTSLEKIEEDLAQTRALIQRAIRSKKSTTNMKQSFVPKGSIYLNPHAFHQSHKEMVKRFKVWVYKEGEQPLVHDGPVNNKYSIEG QFIDEMDTSNKSPFKATHPELAHVFFLPFSVSKVIRYVYKPRKSRSDYNPHRLQLLVEDYIKIVANKYPYWNISQGADHFLLSCHDWGPRVSYANPKLFK HFIRALCNANTSEGFWPNRDVSIPQLNLPVGKLGPPNTDQHPNNRTILTFFAGGAHGKIRKKLLKSWKDKDEEVQVHEYLPKGQDYTKLMGLSKFCLCPS GHEVASPRVVEAIYAGCVPVIICDNYSLPFSDVLNWSQFSMEIAVDRIPEIKTILQNITETKYRVLYSNVRRVRKHFEMNRPAKPFDLIHMILHSVWLRR LNFRLHLKQM…
MtGT47_27	Medtr4g115540.1	Chr4	47731269-47727672	MKKSLIICRMGYISMNGSGSSSFWSCPWCSLRFIESLAPCIDIHDMLLSVKDVFSSGSPHAHILYTQLPSFAIDLINNMQLNFNA SAENAFIWTHNKNCIYTANSGYSWILARMNSVINSPLSWSWFWKLQSSKKIKFLFWQIFIQPATLKLSYMEALRCFTTSLLLPLFFFLIFLFTSQKGFHF SFFVFPFSLPSIKDMNNATQVIKPHQFLTYNSAYRSFDHKENSSIKKIMSSLDRVEGSLSEARASIREAILSRNYSTSRRRDVFVPRGSIYRNPYAFHQS HMEMVKRLKIWVYQEGEQPIVHDGPVNNIYAIEGQFIDEIDNSKMSPFKAKHPNEAHIFFLPFSVANVVQYVYKPIMSKKDFNRDRLHRMVEDYVNVVAH KYPYWNRSNG…
MtGT47_28	Medtr4g119810.1	Chr4	49642311-49644124	MAPSKPHISIYISIITIFLLLLNPTKSEENKNLKSTTTENECEQRWIHIRKLPPKFNLDLLSNCSEYTFLDDLCPYLANHGLGQK THNRSHSWYRTDPSMLELIFHRRMLEYPCLTEDPKTANAVYLPYYAAFDSLRYLYGPEYNSSEQHGVHLFHFLTKENHPEIWNRHSGHDHFLVMARPAWD FAQPLDNDPHLWGTSFLELPHFFNVTALTLESRAWPWQEHAVPYPTSFHPPNLALLDSWIQRVRRSKRSSLALFAGGGGFSATPNIRRSIRMECDNDNNS SNVNGNSFGYEKLCETVDCSNGVCEHDPIRFMKPMLGANFCLQPPGDTPTRKSTFDAILAGCIPVFFEDLSAKSQYSWHLPENEFEGFSVTIPKEDVVFK GLKIFDVLQR…
MtGT47_29	Medtr4g129930.1	Chr4	54179785-54181197	MNNAKRFEEIATTPSNFSSHFDETICCTTTTNQNNVTNIGATYAPIVSPPLIEENVDEVFTKLSPTILDPCLGRYIYVYDLPSRF NKDLLKRCHTLLKWEDLCLYLSNLGLGPKIIEESKKKVLSKKNWYATNQFSLEVIFHNLMKHYKCLTNDSSLASAIYVPYYAGLDISQYLWGFNVSIRDE SPKKLVKWLAQQPQWKRVYGKDHFMVGGRISYDFRRRSDENEDWGTKLMFLPEASNMSMLSIESCGYDNEFSIPYPTYFHPTNDAQIFGWQRKMRKMKRK YLFSFVGAPRPNVTSSIRNELIEHCESSKGCKLVGCYYGYNKDRCGDPVHVMDVFRNSVFCLQPPGDSYTRRSTFDSILAGCIPVFFHPKSTYKQYVWHF PTNSSNYSVF…
MtGT47_30	Medtr5g010350.1	Chr5	2753900-2755471	MVMSLSFLGRISALIFLLFLIYMWSSLSTIITVNTIHVCCSTRKFSNSFYCLSSPTHTNTSFEISNYSINNNTISTSIITTIENI DDGNNASQELGTFPITTPYDEEVAYAVKIIEEQLKVQRSWRSENKNNATCDDGQGIYVYDLPSRFNKDLIGQCNEMFPWQDFCRYTSNEGFGEPRSKLGK GWYNTHQYSLEQIFHSRVLKHPCRVYNENDAKLFYVPFYGGLDVLRWHFKNVSNDVKDSLGLELVKWLEKQVTWKRNLGKDHVFVLGKISWDFRRTSDSP WGTRLLKLDEFQNPIKLLIERQPWHLNDIGVPHPTFFHPKSDNDIIDWQLKIIRSNRKNLVSFAGAARDDADDHIRSILINQCSSKSEGKCKFLNCSSVK CSEPESIMEL…
MtGT47_31	Medtr5g010370.1	Chr5	2757747-2759550	MAVSLSKKRSKFSRKLEPKQSCFAFTILYSFIRRISALIFLLILIYIWSSFSTIITGNIIHVCFSTRKLNDNFYCVSAATHTNPS FDIPTYSINNNTVSTSIITTTEKIEVSNNVTQELGNLSIGTPYNEEVANAVKIIEEHLKVHRSWRSENKNNATCDDGKGIYVYDLPSKFNKDLVGQCSDM LPWQDFCRYISNEGFGEPISKLGKGWYKTHQYSLELIFHSKVLKHPCRVYNENDAKLFYVPFYGGLDVLRWHFQNVSNDVKDSLSLELVKWLERQVNWKR NLGKDHVFVLGKISWDFRRTSDSPWGTRLLELEKLQNPIKLLIERQPWHVNDIGIPHPTYFHPKSDNDIIDWQLKIIRSNRRNLVSFAGAARDHADDHIR SILINQCSSE…
MtGT47_32	Medtr5g031480.1	Chr5	13505206-13511894	MMSSVKQNQQQSSFHTLFSLRGSLLTLAILTLLSFTYLSLKYSTPSSQGPESVNVKVVDAGKNEEEDDGGDEFGDVYHSPRVFKL NFAEMEKKFKVYIYPDGDSKTFYQTPRKLTGKYASEGYFFQNIRESRFRTLDPDEAHLFFIPISCHKMRGKGTSYENMTIIVQNYVESLISKYPYWNRTL GADHFFVTCHDVGVRATEGLPLLVKNSIRAVCSPSYDVGFIPHKDVALPQVLQPFALPAGGNDVENRTSLGFWAGHRNSKIRVILARVWENDTELDISNN RISRATGHLVYQKRFYSTKFCICPGGSQVNSARIADSIHYGCIPVILSNYYDLPFNDILDWRKFAVVLKESDVYQLKQILKNKSQDEFVALHNNLVKIQK HFQWNSPPVR…
MtGT47_33	Medtr5g049790.1	Chr5	21785800-21778866	MKQLKKFPLTSKASSSSHHITDPSESSSSSSSSSSSLLMMSSVKQNQQQSSFHTLFSLRG SLLTLAILTHLSFTYLSLKYSTPSSQVPVTVKVVDAGRNEEEDDGGDEFGDVYHSPRVFK LNFAEMEKKFKVYIYPDGDSKTFYQTPRKLTGKYASEGYFFQNIRESRFRTLDPDQAHLF FIPISCHKMRGKGTSYDNMTIIVQNYVESLISKYPYWNRTLGADHFFVTCHDVGVRATEG LPLLVKNSIRAVCSPSYDVGFIPHKDVALPQVLQPFALPAGGNDVENRTSLGFWAGHRNS KIRVILARVWENDTELDISNNRIYTKFCICPGGSQVNSARIADSIHYGCIPVILSNYYDL PFNDILDWRKFAVVHNESDVYQLKQILKNKSQD…
MtGT47_34	Medtr5g055350.1	Chr5	22794003-22795346	MNMLMLKKSLVKHWFVIFISPFILCVSCLILSKYFMKGVSPTFHAPKKLDPCLGQYIYVYDLPSRFNDDLLKGCNTLIKWENMCP YLSNLGLGPKIIEESNETVISKKNWYATHQFSLEVIFHNIMKDYKCLTNDSSLASAIYVPYYAGLDVGRYLWGGFNISIRDESPNQLVKWLAQQSQWKRM YGKDHFMVGGRVGYDFRRGSDKDEDWGTKLMFLPEASNITILLIESCADKEFPLYENEFAIPYPTYFHPSNDDEIFEWQRKMRNRKREYLFSFVGAPRPN LTSSIRNELIDHCQSSKSCKLVGNHFGDPVHVLDVFQKSVFCLQPPGDSFTRRSTFDSILAGCIPVFFHPHSAYKQYMWHFPKNNSSYSVFIPETDVKRK RVMINETLFN…
MtGT47_35	Medtr5g081290.1	Chr5	34825595-34824692	MAQNFKVFMYQPNTNTNITQFSFKTEQESLFYSSLQNSSYLTQHPEQAHLFFLPFSSDTSTRSLARFISRIRNDFPYWNRSLGAD HFYLSCDGISHVNDRNIVELKKNAIQIACFPTRHRSFIPHKDITLPPITNPHAPVRLSNEEFCVVEYQNDDVLWLGEALRLGCVPVVVTEEAVNDMPFME VLRWREMAVFVKSGVNIETDTWRERKGNMRRLGVVGSKHLRWNRPAQPFDAFNTIMYQLWLRRHTIRYESVQSS*
MtGT47_36	Medtr5g095940.1	Chr5	41941863-41943353	MGMPMLMKYLVQFRYVFLITASIFFVSLLFLDYYQEIFAAPSTFSTICCGTNNQNNVTNEATSNDEGNRRTNPLIKHNVDEVFKK LPPKIMDPCLGQYIYVYDLPARFNEDLLKGCHSLQKWENMCVYLSNLGVGPKIIEKTKKKVLSKKSWYATNQFSLEVIFHNTMKHYKCLTNDSSLASAIY IPYYAGLDAGQYLWEFNISMIDKSPNEFVKWLAQQSQWKRLHGKDHFMVGGRIGCDFRREGDLDDDFGTKLMSLPELSNVSFLLIESCKGLYDNEFPIPY PTYFHPTNDDEIFNWQRKMRDRKRNYLFSFVGAPRPNSTSSIRNELIKHCESSKSCKFVRCYHGSSKKKSCRDPVQVMDNFQNSVFCLQPVGDSFTRRSI FDSILAGCIP…
MtGT47_37	Medtr5g095950.1	Chr5	41946933-41949373	MLLGISIWFNSGLFLITASIFCVSLLSLDYYLASNNSGMTFLLSNMNNAKQEDEVFKKLLQKIVDPCLGQYIYVYDLPARFNEDL LKGCHSLQKWENMCVFLSNLGVGPKIIEKSKKEVLSKKNWYATNQYSLEVIFHNIMKHYKCLTNDSSLASAIYVPFYAGLDAGQYLWEFNISIRDKSPNE FVKWLGQQSQWKRLHGKDHFMVGGRIGCDFRREGDSDHNWGTKLMFLPEVSNMSFLLIESCKGLYDNEFPIPYPTYFHPTNDDEIFKWQRKMRNKKRDYL FTFVGAPRPDSPSSVRNQLIKHCESSKSCKRVGCYHGSSKKISCRDPVQVMDNFQNSVFSYKQYLWHFPKNGSNYSVLIPEIDVKEGKVMINETLFNVSK SEVLAMREEV…
MtGT47_38	Medtr6g027310.1	Chr6	9326018-9328816	MTMVERNVNSFKLVSKNSLLFLFTMMSIMFLMSWFFVLRSTNRPHFIDHNLLPNSKILSTFEYSKFHTKVPNIESSFGNRAILVD VEDVEDESETNKPKDGGKCRNRNDDFLLKVFMYDLPSKFHFGLLDWKPSGNSVWPNVRTTIPGYPGGLNLQHSIEFWLTLDILASEIPNAPKAKTVIRVR NSSEADIIFVPFFSSLSYNRNSKRRPNEKITKNIMLQEELVKYVTSQEEWKRSKGKDHVIIAHHPNSMLDARMKLWPATFILSDFGRYPSSIANVEKDVI APYKHLITSYVNDNSNFDSRTTLLYFQGAIYRKDGGYVRQELYYSLKNEKDVHFSFGSIQKDGIKKATEGMRLSKFCLNIAGDTPSSNRLFDAIASHCVP VIISDEIELP…
MtGT47_39	Medtr7g085840.1	Chr7	33299736-33301089	MNRSFKIYVYPHKKDDPFANVLLPVKTEPSGNYASESYFKKALMKSHFITKDPTKADLFFMPFSIASLRHDRRVGVGGIQDFIRDYVQNMIHKYPYWNRTNGADHFYVACHSIGRSAMDKAPDVKFNAIQVVCSSSYFLSGYIAHKDACLPQIWPRNENPPNLVSSNRKKLAFFAGEVNSPVRIN LVETWKNDTEIFVHNGRLKTPYGDELLGSKFCFHVRGYEVNTARIGDSLYYGCVPVIIANYYDLPFADVLNWKSFSVVVTTLDIPLLKKILKGIVNSGEY LMLQKNVLKVREHFQWHSPPIDFDAFYMVMYELWLRRSSIPILLGDS*
MtGT47_40	Medtr7g087100.1	Chr7	33902540-33905576	MAEKNTSAIKVVSRKSLWFFFTTTTLFFIMSWLFVLRSTRSDSTPATISQLLSTTSNDGSDLVTSQSQNSESSFSNRAILVNTET KTPETPKCITETTTISNNDTKSNNNKSNAVLKVFMYDLPPEFHFGLLDWKGDEKTKNVWPDMKTKIPHYPGGLNLQHSIEYWLTLDILASELPEIYPARI VTRVRNSTEADVIFVPFFSSLTYNRHSKTGPHERRSRNKVLQEKLVRYLMNQEEWKRSGGRDHLILAHHPNSMLDARMKLWPATFILSDFGRYPPNIANV DKDVIAPYKHVIASYVDDQSTFDSRKTLLYFQGAIYRKDGGYARQELFYLLKEEKDVHFSFGSVQKGGVRNATNGMRSSKFCLNIAGDTPSSNRLFDAIA SHCVPVIISD…
MtGT47_41	Medtr7g098650.1	Chr7	39486791-39484481	MRRRPVAAIFSDQMEKSTTKSHNSRIFFLASLSAFFWLLLLYFHFIILPHQQSSTTVNIQQPPPRKHFGFPDIKKTDPCGGRYIY VHNLPSRFNQDMLRECKTLSLWTNMCKFTTNAGLGPPLENIDGVFSDTGWYATNQFAVDVIFANRMKQYECLTNDSSIAAAVFVPFYAGFDIARYLWGYN ISMRDAASVELVDWLMKRPEWGVMNGRDHFLVAGRITWDFRRLSEDEKDWGNKLLFLPAAKNMSMLVVESSPWNANDFGIPYPTYFHPAKDKDVFVWQER MRRLERKWLFSFAGAPRPGNAKSIRGQIIEQCRSSKVGKLLECDFGESKCHSPSSIMQMFQGSVFCLQPQGDSYTRRSAFDSMLAGCILVFFHPGSAYTQ YTWHLPKDYT…
MtGT47_42	Medtr7g103150.1	Chr7	41685801-41687968	MGQQVFSLLERKKLLSLLSIITFALILAFHCYFKLPCGSNVLQHSLESVHKTMMVNNSYVNVIDNHSSITMMPKETEGSLVKVPE MTSISEMDKLLLQNHSSYQSMRPRWFSAVDQELLQARSEIENAPVVTDVGNLYTPLFRNISMFKRSYELMEKILKVYVYREGAKPIMHSPNLLGIYASEG WFMKLMEANKVFVTKDPKNAHLFYLPFSSQMLEETLYIQNSPSYSNLMQYLNNYVDTIAAKHPFWNRTGGADHFLVACHDWAPSETNERMTKCIRSLCNA DLKESFVLGKDTSLPETYVRNAQIPTRGLGGKSVSKRKTLAFFAGGMHGYVRPILLQHWGNKDPDMKIFGELPKSKGNKNYIQYMKGSKYCICPKGYEVN SPRVVEAIMY…
MtGT47_43	Medtr7g103260.1	Chr7	41756098-41757947	MNESQILLQKPNLPRKFSILDRTEAGLLQARAAIRKARNENRTQDIDYVPTGPMYHNPNSFHRSYLEMEKQFKVFVYEEGEPPVF HNGPCKSIYSMEGNFIHAIEMNDRFRTRDPEKAHVFFLPFSVAKMVQFVYVRDSHDFSPIRKTITDYINVVSEKYPFWNRSLGADHFMLSCHDWGPETSK SVPNLYKNSIRALCNANTSEGFKPAKDVSIPETNLQTGTIHGIVGGPSPSKRSVLAFFAGGVHGPVRPVLLEHWEHKDEDLQVHKYLPKGVSYYDMLRKS KFCLCPSGYEVASPRVVEAIYTGCVPVLISDHYVPPFSDVLNWKSFSVEVSVNDIPNLKKILTSISPRQYIRMQRRVGQVRRHFEVHSPPTRFDVFHMIL HSIWLRRLNF…
MtGT47_44	Medtr7g103270.1	Chr7	41764053-41766030	MNLKSYGFQQKPNLAGKLSNLDRVEADLLQARAAIRKAVNGKQTQDIDYVPTGPMYHKPNLFHRSYLEMEKRFKVFVYEEGEPPV FHDGPCRDIYSMEGIFINQMEMNDKFITKDPEKAHVFFLSYSVAMMVHYVYVRDSRAYDLLRITVKDYINVLSEKYPYWNRSHGADHFILACHDWGPEVS NAVPNLYKNSIRAFCNANTSEGFKPVKDVSIPEINVRTGIIDDLLGGPSPSKRSILAFFAGGLHGDIRNVLLEHWEHKDEDIQVHKYLPKGVSYYAMLRK SKFCLCPSGWEVASPRVVEAIYTGCVPVLISDHYVPPFSDVLNWKSFSVEVSVNDIPNLKKILSNISPRQYIRMQRRVGQVRKHFEVNSPPKRFDVFHMI LHSIWLRRLN…
MtGT47_45	Medtr8g080490.1	Chr8	34619281-34624528	MYEKVILTFIFVFLLIISYSIFIGTLDIRSYFYQSPTLQPAPCKPDPPLRVYMYDLPPRFNVGMITRRNTSESPVTVRDFPRWPG NWGLKKQHSVEYWMMGSLLHDGDGGEAVRVSDPELADAFFVPFFSSLSFNTHGHTMTDPATEIDRKLQVDLMEFLKKSKYWQRSKGRDHVFPMTHPNAFR FLRNQLNDTIQVVVDFGRYPKGMSNLNKDVVSPYVHVVDSYTDDEPQDPYEIRSTLLFFRGRTFRKDEGIVRAKLMGILSGYSDVHYERSVATGANIKAS SKGMRSSKFCLHPAGDTPSSCRLFDAIASHCVPVIVSDQIELPFEDEIDYSQFSLFFSFKEALQPGYMVDQLRKVPKQKWTEMWRQVKNISHHYEFQYPP KREDAVNMLW…
MtGT47_46	Medtr8g096140.1	Chr8	40096127-40101544	MGIWKLGFLGLLCATFLFTIDAVELRRNQPTERISGSAGDVLEDDPVGRLKVFVYELPSKYNKKILQKDPRCLTHMFAAEIFMHR FLLSSAVRTLNPEEADWFYTPVYTTCDLTPNGLPLPFKSPRMMRSAIQLISSNWPYWNRTEGADHFFVVPHDFGACFHYQEEKAIERGILPLLRRATLVQ TFGQRNHVCLKDGSITIPPYAPPQKMHTHLIPDKTPRSIFVYFRGLFYDVGNDPEGGYYARGARAAVWENFKDNPLFDISTEHPTTYYEDMQRAVFCLCP LGWAPWSPRLVEAVVFGCIPVIIADDIVLPFADAIPWEEIGVFVDEQDVPKLDTILTSIPPEVILRKQRLLANPSMKQAMLFPQPAQSGDAFHQVLNGLA RKLPHDRSVF…
MtGT47_47	Medtr8g096160.1	Chr8	40105988-40109200	MGISKFSFLGFLSVAFLSSIDAVDLHRNQPTERISGSAGDVLEDDPVGRLKVFVYELPSKYNKKILQKDPRCLTHMFAAEIFMHR FLLSSAVRTLNPEEADWFYTPVYTTCDLTPNGLPLPFKSPRMMRSAIQLISSNWPYWNRTEGADHFFVVPHDFGACFHYQEEKAIERGILPLLQRATLVQ TFGQRNHVCLKEGSITVPPYAPPQKMHSHLIPDKTPRSIFVYFRGLFYDVGNDPEGGYYARGARAAVWENFKDNPLFDISTEHPTTYYEDMQRAVFCLCP LGWAPWSPRLVEAVVFGCIPVIIADDIVLPFADAIPWEDIGVFVDEQDVPKLDTILTSIPPEVILRKQRLLANPSMKQAMLFPQPPQAGDAFHQVLNGLA RKLPHDRSVF…
MtGT47_48	Medtr8g102840.1	Chr8	43303111-43306647	MFQYFRELCHMGNQRLLFLLGALAVNYLLFQSILVPYENERAPWSSSDFNNAVMVEKVNTPIIEDVGMHNHAKSSLVSELGVDRN DFHILLGKKDVGKNRSLELDNVGGSKKSSIVVLAKESKVDFLVKPSLEPKRGISTISQLVKSNTIDSREHDGVGFDASQSSMSLTNRTRLESSPQIKKLP ASDKSTAANNITVRKMRCNMPPKSRMLIQEMNHLLERRRTSSRAMKARWKSKLDMEIFAARSEIEHAPTVTNDKELYAPLFRNHSMFKRSYELMELTLKV YIYMEGNKPIFHQPILKGLYASEGWFMKLMEENKQFVVKDPAKAHLFYMPFSSRMLEFSVYVRNSHNRTNLRQYLKEYTDKISAKYRYFNRTGGADHFLV ACHDWAPYET…

## Sheet: Vitis vinifera
CAZy Family _Gene ID1	Model	Chl	Chromosome position	Protein sequence
VvGT47_1	GSVIVT01012106001	Chr1	1418372-1422376	MARKSILKSTVVTVLCVFGLYGLSTTFFNPINPYHSRLDLSLPLDSSSKSLSLLSTDSGENLSKFSRNFGPVKVYMYDLPRKF TYGVIESYAVARGGLEKVPVDDVSSLKYPGHQHSGEWYLFSDLIREDRGRRYVVRVSDPEEADLFYVSFFSSLSLVVNPIRPANGEGAGTGYSDEEMQES LMEWLEQQEYWKRNNGRDHVFICQDPNALHLIVDRVKNGVLLVSDFGRLRSDTASLVKDVILPYAHRIKSYSGEIGVENRKSLLFFMGNRYRKEGGKIRD LLFQILEQEEDVIIKHGAQSRESRRMASQGMHSSKFCLHPAGDTPSACRLFDAIVSLCVPVIVSDQIELPFEDVIDYRKIAIFVDSTSAVKPGFLVKNLR KITRERILEYQR…
VvGT47_2	GSVIVT01010454001	Chr1	20746045-20750153	MYDLPRRFHVGMLRRRSPADESPVTAENLPPWPSNSGLKKQHSVEYWMMASLLYDGGGGNETREAVRVWDPEMADAFFVPFFS SLSFNTHGHNMTDPDTEFDRQLQIDILKILRESKYWQRSGGRDHVIPMHHPNAFRFFREQVNTSILIVADFGRYPKEISNLRKDVVAPYVHVVDSFTDDN SPDPYESRTTLLFFRGRTIRKDEGIVRDKLVKLLAGHTLHVIHVLAACTLPLSFAESSIFEGSVMAVYYIVVGWCLRCRSKKISIVELWQSKELIIQVVK AAGFLSKLCSCQLWGVHSTQGMRSSKFCLHPAGDTPSSCRLFDAIVSHCVPVIVSDQIELPYEDEIDYTQFSIFFSDKEALEPGYMIEQLRQIPKERWVE MWRHLKYISHHY…
VvGT47_3	GSVIVT01001097001	Chr1	22621561-22626108	MGVWIWVLVFGFVWGIGAHGLDRHPHTERISGSAGDVLEDDPVGRLKVFVYELPSKYNKKILQKDPRCLNHMFAAEIFMHRFL LSSPVRTLNPEEADWFYTPIYTTCDLTPNGLPLPFKSPRMMRSAIQLISSNWPYWNRTEGADHFFVVPHDFGACFHYQEEKAIERGILPLLQRATLVQTF GQRNHVCLNEGSITIPPYAPPQKMQAHLIPQETPRSIFVYFRGLFYDVNNDPEGGYYARGARAAVWENFKDNPLFDISTEHPTTYYEDMQRAIFCLCPLA DDIVLPFADAIPWEEIGVFVAEEDVPNLDTILTSIPPEVILRKQRLLANPSMKQAMLFPQPAQSGDAFHQILNGLARKLPHNKNVYLKPGENALNWTAGP VGDLKPW*
VvGT47_4	GSVIVT01001143001	Chr1	22983271-23001188	MRRPHTCFSEKPQQHLILPHRRLLLVRPPLLLVLLLLLTLTVSSWLAVFLCGFSKPRQQQVPSLEFNESLNNNNAHHSSAESV QDRNDSLSSGNLLGSPYHNWQLFASDFQEMLHKLKIFVYPDASMNQSSSPFARVFLPNPNPFHPKLANYFSEHMFKVALLRSSLLTPHPQDAHFFFLPFS VNTLRNDPRVHSEASISDFVTQYTTRISWEYKFWNASRGTDHFYICCHSVGREAASKHHDLHNNAIQVTCSSSYFQRLYISHKDVGLPQVWPRPPEKLLN PPELRHKLVFFAGRVQNSHIRQELMAVWGNDTDIDLFSGSPPFPYEEGLRKSKYCLHVKGYEVNTARVCDAIHYGCIPVIVSNYYDLPFSNVLDWSKFSV IISHKSIATLKK…
VvGT47_5	GSVIVT01019767001	Chr2	3144644-3153646	MNNLKLGVDVVSAHNLMPKDGQGSSSAFVELYFDGQKFRTTIKEKDLNPVWNESFYFNISDPSNLHYLTLDTASTYDLVEQMQ FLFVRVVKARELPAMDVTGSLDPYVEVKIGNYKGVTKHMEKKQNPEWNVVFAFSRDRMQASVLEVVVKDKDLVKDDFVGRARFDLNEVPMRVPPDSPLAP EWYRLEDKKGEKIKGELMLAAQDLVPTEKNRFPDVYVKVHIGNQVMKTKTVQARSLTTLWNEDLLFVAAEPFEDHLILSVEDRVGPGKDEILGRVIIPLS TVDRHGKGTSDTYCVAKYVAARLGRAEPPLRKEVVEYMSDVDSHLWSMRRSKANFFRLMSIFSGLFAVGKWFGDICMYPPHMNTRISQADAVHPDELDEE FDTFPTSRSPEL…
VvGT47_6	GSVIVT01001277001	Chr2	4921780-4923609	MVGQTFPQMTSGFFSMASRPRILIWVAFFFFFEFVFCESVIDPDAPECTNRWIHIRRLPTRFNLDLLTNCSEYPVFDDFCPYL ANHGLGQKTHNNSHSWYRTDPLILELVFHRRMLEYPCLTSDPSAADAIFLPYYGGIDAIRYLFGPEVNSSFEHGLELYEFLQQDSPEVWSRNGGHNHFTV LARPAWDFSQSLDNDPPIWGTSFLELPEFYNITVLTLESRPWPWQEQAIPYPTSFHPASLVLLDSWVQRVRRSRRTTLMLFAGGGGTSLLPNIRRSIRSE CDNTLPHFTV*
VvGT47_7	GSVIVT01012525001	Chr3	594622-613113	MEMKFKVFVYPDGDPNTYYQTPRKLTGKYASEGYFFQNIRQSQFRTDDPDQAHLFFIPISCHKMRGKGTSYENMTIIVQNYVQ SLMSKYPYWNRTLGADHFFLTCHDVGVRATEGVPLLVKNSIRVVCSPSYDVGFIPHKDVALPQVLQPFALPTGGRDIKNRTTLGFWAGHRNSKIRVILAR IWENDTELDIKNNRINRATGHLVYQNKFYRTKFCICPGGSQVNSARIADSIHYGCVPVILSDYYDLPFNDILDWRKFSVILKERDVYRLKYILKDIPDAE FIALHDNLVKVQKHFQWNTPPIKYDAFHMVMYELWLRHHVIKY*
VvGT47_8	GSVIVT01035630001	Chr4	2835735-2842423	MGHKFRYLWQVEARHLLWLIGTVFSVVFVVQYFELPYGDVLSSLFSAGDIPAPGKTSLPSSDSFNAETMEGNNEGPKNDFASV MNGALDKSFGLDEDNKNVTVEKVNNSGNRSALKNASKHESSLYLENITADSNSSLGKIQEDDMALLSQRSERSGVGLISPLPALPQIISSSNTTSLTNLD PHPITLPPERSSVEEDAAHTLNKDEKAETSQKDLTLSNRSSISVPALETRPELPAVTTISEMNDLLVQSRASSRSMKPRWSSAVDKELLYAKSQIENAPI IKNDPGLHASLYRNVSVFKRSYELMENTLKVYTYREGERPVFHQPPIKGIYASEGWFMKLMQANKKFVTKNGRKAHLFYLPFSSLMLEEALYVPNSHSRK NLEQYLKNYLDM…
VvGT47_9	GSVIVT01035880001	Chr4	5206353-5210218	METNYGTLVSLLSCLCVASVVVVCIVSGHYSQSIKFSGAEPGDSVATIELQTKVTASHEVRAVFSSQPPAFYVNRLRNHTLIR KIKKRTRYQGQEEGLARARASIRKAFSNLNRSSEIGGEDNNEVPTGDVYRNAGAFYQSYVEMEKRLKVYVYEEGEVPMIHDGPCKDIYTIEGRFIHEIEH GDGKFRTRDAERAHVYFMPFSVTWMVKYLYKPLTYNLTPLRQFVSDYVSVISTKYPFWNTTQGADHFMLACHDWGPHASRGHPVLYNTSIRVLCNANTSE GFNPQKDVSLPEIHLYGGNVNPKLLSPPPPNSPRPFLAFFAGGLHGPIRPILIQHWMGRDTDLRVYEYLPKDMDYYSLMLQSKYCLCPSGHEVASPRIVE AIYSECVPVILS…
VvGT47_10	GSVIVT01035881001	Chr4	5211280-5215609	MVFLCCFQLEKKSYFEKREESLAKARVAIRKAGRSRDYTLYKNESFFPRGPVYRNPYAFYQSHIEMEKRFRVWTYQEGEKPLF HSGPMNLIYGIEGQFMDELESKNCPFSARHPDEAMLFYIPISVVNIIRYVYQPYTNSASYSRVRLQGLVADYIDVISRKYPFWNRSSGADHFMVSCHDWA PEISAANPKFFRHFIRVLCNANTSEGFKPVRDVSLPEILVPYRMLGPPYLGQPPTNRSILAFFAGGAHGKVRSILFHYWKEKDEDIQVHEYLPTTLNYTE LMGRSKFCLCPSGFEVASPRVVESIYAGCVPVIISDNYSLPFSDVLDWSQFSVHIPIARIPETKTILQAIPIQEYLTKQKTVMQVQRHFTLNRPAKRFDV LHMVLHSIWLRR…
VvGT47_11	GSVIVT01031644001	Chr5	19523280-19525079	MKFSLTNLLTATPSLSYLILLWRKQSLGSASINSARAPKIFGQIHPIVDECVGQYIYVHNLPSRFNDDLLEDCHSINQWYDIC EYLSNSGLGPQLSNSGDVDDFPNKSWFATDQFLLEVIFRTRMKDYKCLTNDSAMASAVYVPFYAGLEISRHLWGFNASPEWKRMWGKDHFLIVGRVTWDF RRMPNNESFWGSNFLRLPESENMTILGIESSHGADNDFGIPYPTYFHPSHDSEVFEWQNSMRRKRRQYLFSFAGADRPQDGDSIRGEMMNQCRASRDKCK LLDCAFDKKNNCKTINVMQMFQNSSFCLQPTGDSFTRRSTFDSILAGCIPVFFHPVSAYRQYLWHLPKEHTKYSVFIPMNYIKEGIASIEKVLLGIPEQR MLAMREEVISLI…
VvGT47_12	GSVIVT01024941001	Chr6	5873970-5875430	MVAGNKQEPVVDEVVKENGVEQGNTVPSVETGTDIKQGSGDKGEVIESDSCSGRYVYIHDLPSRFNEDMLKNCQSLSAWTDMC LYLSNMGLGPRLSNSERAFSNTGWFGTNQFSLEELKDTASTDLSKWLAEQPEWKVMWGRNHFAVAGRISWDFRRQTNILSQWGNGLMYLPTFKNMTIMRR QRRRFLFSFAGAPRPNLPDSIRNQIIDQCSASRRKCKLLECGLVGSNRMHTSFLPPRVCLCPIFMALTQELHEVLSVHTRQQHQKWECQHREDTASNSKR GSILERVETVRRDMREGRNSSFAFDEEMSWKYSLLGTDSAKHEWDPFFDKANANF*
VvGT47_13	GSVIVT01031485001	Chr6	18033994-18036569	MVDFSRPSRNRGFYVRMRLLHKQGRQEKSYCFRYFRWVLWLSLSLYFFSSYLITNHPRKLTSIPKVTVSNSKASRALFETVNT TIQQQPRDHQDLLKDLKVYIYDLPSKYNVDWLSNERCSNHLFASEVALHKALQESDVRTFDPWEADFFFVPVYVSCNFSTVNGFPAIGHARPLLASAIQH ISTQLPFWNRSLGADHVFVASHDYGACFHAMEDVARADGIPEFLKKSIILQTFGVKHQHPCQDVENVLIPPYVSPEKVQSTLDSAPANGQRDIWVFFRGK MEVHPKNISGRFYSKAVRTAIWQKYGGNRKFYLKRHRFAGYQSEIVRSVFCLCPLGWAPWSPRLVESVVLGCVPVIIADGIRLPFSEAIRWPEISLTVAE KDVGKLGMILED…
VvGT47_14	GSVIVT01028435001	Chr7	7494452-7501710	MNGIAGATSPEAPRGKNTPTTDTRGPAHVAKMRLAATSAIYTLTHILLLGWNLMRRRPTTTILPEQMDKGMPKNQQTRLCFLA SLSALFWVLLLYFHFVVLGNSNVDESVQLTTIPVATQSHITSVITSPPEVTNLAKSPYPELNKETSLAQSKLDNYPFMRALRTVENKSDPCGGRYIYVHD LPPRFNEDMLKECKSLSLWTNMCTFTSNAGLGPPLENVEGVFSNTGWYATNQFAVDRPEWKIMGGKDHFLVAGRITWDFRRLTDLESDWGNKLLFLPAAK NMSMLVVESSPWNANDFGIPYPTYFHPAKDTDVLIWQDRMRKLERKWLFSFAGAPRPGNTKSIRGQIIDQCRTSKVGKLLECDFGESKCHSPSSIMQMFQ SSLFCLQPQGDS…
VvGT47_15	GSVIVT01029936001	Chr8	1739902-1744871	MAERNASPLGFVTRNSLLCLFSVASILFILSWLSVLRSTGRPRFIDHSLLPNSKLFAVTDNGNSESQNQNDIEPSIESEEKAL EGKNSVKCGSNYPVLKVFMYDLPAEFHFGLLDWAPAGESVWPDIRTKFPLYPVHNSSEADVIFVPFFSSLSYNHFGKFKGRQKKNENNLLQDKLVKFLTA QEEWIRSEGRDHIIMAHHPNSMLDARMKLWPAIFILSDFGRYPPNIANVGKDVIAPYKHVIKSFINDTSDFDSRPTLLYFQGAIYRKDGGFIRQELFYLL KDEKDVHFAFGNTQGNGINKASQGMHSSKFCLNIAGDTPSSNRLFDAIASHCVPVIISDEIELPYEDVLDYSQFCIFVRTSDALKDKFLIKLIRSIKKDE WTRMWRRLKEVE…
VvGT47_16	GSVIVT01022479001	Chr8	3527773-3534417	MARSFFILYHFSGRRFSDSFRGFFFIPTILALITSLFILFYISSTSNLFTHPQETHLQVLKSALGSSAFSPPSHQFMRVPAET PHLSRGFEFNTKGRFVLLWCTIIRHDRNLFVENYKEMNRSFKIYCYPHKRDDPFANALLPVDFEPGGNYASESYFKKVLMKSHFITKDPSKADLFFLPFS IARLRHDPRVGVGGIQDFIRDYIFNISQNYPYWNQTGGADHFYVACHSIGRSAMEKADEVKLNAIQVVCSSSYFLSGYIAHKDASLPQIWPRQGDPPDLA LSERKKLAFFAGSINSPVRERLLQVWRNDSEISVHFGRLTTPYADELLGSKFCLHVKGFEINTARIADSLYYGCVPVIIANHYDLPFADILNWKSFSIVV ATLDIPLLKQVL…
VvGT47_17	GSVIVT01033738001	Chr8	18222784-18224352	MEKQLKVYVYDEGEPPLFHNGPCKSIYSMEGNFIHKMEMDSHFRTKDPEKAHLFFLPFSVAMLVRFVYVRDSHDLGPIKQTVI DYVNVVSTKYPYWNRSLGADHFMLACHDWGPETSFSIPYLHKNSIRVLCNANTSEGFNPSKDVSFPEINLLTGSTDSFIGGPSPSHRTLLAFFAGGLHGP IRPILLEHWENKDEDVKVHKYLPKGVSYYEMMRKSKYCLCPSGYEVASPRVVEALYTGCVPVLISDHYVPPFSDVLNWKSFSVEVPVREIPNLKRILMDI SPRQYIRMQRRGIQARRHFEVNSPPKRYDVFHMILHSLWLRRLNFRVHHHGIGK*
VvGT47_18	GSVIVT01033325001	Chr8	21485403-21494488	MLHHFPLIMVVNGHNSTNLSDKDKEANEMTFFLQKWKCSWSLLATVASVVALISVAHLFLFPLAPSLEYFSMGQGQKTCTPIN ASIRGVDHDGKNLQPSFDLDHRFPADSHKSVVYRGAPWKAEIGRWFSGCDSIAAEVSIIEKIGGKDCKNDCSGQGICNHELGQCRCFHGFSGEGCSERLH LDCNYPSSPEQPYGPWVVSICPASCDTTRAMCFCGEGTKYPHRPVAEACGFQMNLPTTPGDPKLVDWTKADLDNIFTTNDSKPGWCNVDPTEAYALKMQY KEECDCKYDCLLGRFCEIPVLCTCVNQCSGHGHCRGGFCQCHRGWYGTDCSIPSVLSSVREWPRWLRPAHVEVPDDMHLSGSLVNLDAVVKKKRPLIYVY DLPPEFNSLLLE…
VvGT47_19	GSVIVT01015329001	Chr11	2744484-2751691	MEAEKDKNTNLLQTVSVPLDNNYTIADISITRRRGMKPTTISKMNLLLLQSAVSSYSMRP RWSSPRDRELLSARSEIQNAPVIRNTPGLYASVYRNVSMFKRSYELMERVLKIYIYREGE KPIFHQPRLRGIYASEGWFMKLIEGNKRFVVRDPRKAHLFYVPFSSKMLRTVFYEQNSST PRDLEKYFKNYVGLIAGKYRFWNRTGGADHLIVACHDWNPIYRTISTNTIRIKSQAITMP PFIFVGGESTYDLVSGTFSNKGFNSQAPRITRQCSWNSIRALCNSNIASGFKIGKDTTLP VTYIRKSEDPLKYLGGKPPSQRPILAFFAGSMHGYLRPILLQYWENKEQDIKIFGPMSRD DGGKSRYRDHMKSSKYCICARGYEVHTPRVVEA…
VvGT47_20	GSVIVT01015330001	Chr11	2752151-2755918	MDMTALFMKLCHVESRRLLFIVGLVVASVIVFQVFELPSMNTLTLSPTVKGSVSMMVGDATILKNSISANSYVIRTVVNNSDA SDLEDEADMDYHLASDDDGDLDYSVEMHKEKNSDNEFILEKGVGLDKSMTVRNVRHTDNSPKEKAIEFRHGPLEHLKISDNNFKIDDDRKASTSLTIGEG SNRDGLVSLPLVSPGISSKGTRNLDADSRTSDLSTVSNVKHVMEAEKDKNTNLLQTVSVPLDNNYTIADISITRRRGMKPTTISKMNLLLLQSAVSSYSM RPRWSSPRDRELLSARSEIQNAPVIRNTPGLYASVYRNVSMFKRSYELMERVLKIYIYREGEKPIFHQPRLRGIYASEGWFMKLIEGNKRFVVRDPRKAH LFYVPFSSKMLR…
VvGT47_21	GSVIVT01012805001	Chr11	5550176-5552396	MSPLERIEGGLASARAAIREAVRSSNYTSQKKENFIPRGAVYRNPYAFHQSHIEMEKRFKIWTYKEGDQPLVHGGPKNSIYGI EGQFMDEMESGDSHFVAGHPDEAHVFYIPISVTRIAHYIYSPPVDYSGHMLQRLVTDYIYVVSDKYPYWNRSNGADHFLVSCHDWAPEISIVTPDLYKHF IRVLCNANTSERFQPIRDISLPEFSINITSDKIPEIKKILKAVPNERYLRMQKRVKQVQRHFVINRPAQPYDMLHMILHSVWLRRLNVRLRS*
VvGT47_22	GSVIVT01012806001	Chr11	5557470-5575151	MVNLKYFCDLGFFGSLPMCLNNLTSLRLLDLSRNDFHGTIPSSLFSNMKSLEYISLSYNHFEGSIYFGSLFNHSRLEVFELSS NNNRVVPSFLLSQHDLRVVDLSYNHMTGDVPTWLLDNNTKLEYLSFESNSLTGHMMMGCISLEVLKLSNNSLHDTLPTKSNLTRLSSLSLDNNDLWGEIS RGFLNSSFLLLLDVSSNSLMGQIPDWIGDFLALETLILSRNYLDGVVPTGFCKLNELRFLDLSHNKIGPTLPLCANLTNMKFLHLESNELIGPIPHVLVE ATSLVSLNLRDNKLSSLIPLWISLLSKLRVLLLKGNQLEDSIPLHLSESYMGNILYFMSGLDLSGNELTGPIPPKIGNLKLNFLTVFTVAHNNLSGKTPE RKFQFATFEQSS…
VvGT47_23	GSVIVT01012807001	Chr11	5580210-5582473	MSPLERIERGLASARAAIREAVRSSNYTSQKKENFIPRGAVYRNPYAFHQSHIEMEKRFKIWTYKEGDQPLVHGGPKNSIYGI EGQFMDEMESGDSHFMAGHPDVAHVFYIPISVTRIAHYIYSPPVDYSGHMLQRLVTDYIYVVSNKYPYWNRSNGADHFLVSCHDWAPEISIVTPDLYKHF IRVLCNANTSERFQPIRDISLPEVNIPKGKLGPPHLDKPPNQRHILAFFSGRESGYMRTLLFRSWKENDDEVQVYEHLPSNRDYAKSMVDSKFCLCPSGW EVASPRVVEAIAAGCVPVIICDYYVLPFSEVLDWSKFSINITSDKIPEIKKILKAVPNERYLRMQKRVKQVQRHFVINRPAQPYDMLHMILHSVWLRRLN VRLRS*
VvGT47_24	GSVIVT01012808001	Chr11	5586712-5591626	MSHVERIEEGLARAREAIRRAIQRRNYSSEKEETFIPRGDVYRNPYAFHQSHIEMEKRFKIWAYREGDQPLMHDGPSNDIYAI EGQFMDEIESGKSQFLARHPDEANAFYIPMSLTRVVHFIYEPPHYHGKWIPRLVTDYINFVADKYPYWNRSKGADHFLVSCHDWAPDVSALKPDLYKHFI RALCNANTSERFHPIRDISIPEINIPRGKLGPPHLDQPPNKRPILAFFAGGAHGYVRSVLFKYWKEKDDEVQVFERLPRNRNYSKSMGDSKFCLCPSGYE VASPRIVEAIAAGCVPMIICDHYSLPFSDVLDWSKFSIYITSDKIPEIKKILKAVPTETYLEMQKRVKQVQRHFAINRPARPYDMLHMILHSVWLRRLNV RLPS*
VvGT47_25	GSVIVT01012820001	Chr11	5736757-5739075	MAALSSCPATLFLLPAVVVLLYLFFSPLNENHLTYFLSSSTVFNPTKTSHTTLPEVFLNESLSVSIYRISKQKASSTVKVPMK IKSSLARIEEDLARARAAIRKAVRSKNYSSDKKEAFIPRGCIYRNPYAFHQSHIEMVKRFKVWTYREGAQPIFHEGPLTNIYAIEGQFIDEMDFIVGKSP FIAKHPDEAHAFFLPLSVVKVVQFLYLPITSPEDYSRKRLQRIVTDYVKVVADKYPYWNRSGGADHFMVSCHDWAPSVSYANPELFKNFIRVLCNANSSE GFRPGRDVSLPEVNLPAGELGPPHLGQPSNNRPVLAFFAGRAHGNIRKILFEHWKDQDNEVLVHERLHKGQNYAKLMGQSKFCLCPSGYEVASPRVVEAI HAGCVPVIISNN…
VvGT47_26	GSVIVT01030133001	Chr12	10124569-10129564	MKTMNKKERSTQHYSSSQKILFVGEGDFSFSACLARQFGSAVNMVATSLDPEEMVYTKHWSCETHLEELKRLGCLVLHEVDVK EMSRHPTLIHMEFDFIVFNFPHAGHFPWLCERNVQLIKMHRKLLKAFFESASEMLSSGGEVHVTHRDDFPYNRWKVEKLAKGAGLYLKEKVEFQKDYPGY HNKRGGGIKSNKTFPLKDSYTFKFSVITWESKDDDDEDNDAMRQKEFMNPGNGLNEKSVRERLRPRDAELERVEAGLARARALIREGTTNWSSISAPVGA DYVPQGDIYRNATAFHRSYLLMEKLFKIFIYKEGEPPLFHNGPCKSIYSIEGVFFSLMEGDTHFRTQDPDEAHVYFLPFSVVMIIHHLFDPIVRDKYVMK HVVSDYVKVISQ…
VvGT47_27	GSVIVT01030134001	Chr12	10130090-10132198	MQMHCFVGCSDSLGLASYEKKQETWKDKRYSKLERLEAGLARARSSIREAARNGSLKSTHEDPDYVPQGPIYRNANAFHRSYL EMEKLFKIYVYEEGEPPMFHNGPCKSIYSTEGRFIHEMEKGSVYRTTDPDQALLYFLPFSVVMMVQYLYVPDSHEIHAIEKTVIDYINLISHNHPFWNRS LGADHFMLSCHDWGPRASTSVPYLYNNSIRVLCNANTSEGFNPSKDVSFPEIHLRTGEMSGPLGGLSPSRRPILGFFAGRLHGHIRYLLLEQWKDKDKDL QVYDQLPNGLSYDSMLKKSRFCLCPSGYEVASPRVVEAIYAECVPVLISDNYVPPFNDVLNWKSFAVQVQVRDIANIKRILMGISQTQYLRMYRRVKQVQ RHFMVNAAPQRF…
VvGT47_28	GSVIVT01008661001	Chr17	47471-51961	MELCRWVFCVLLLIASSLRVGAEQLRRGQRTERISGSAGDVLEDNPVGRLKVFVYELPSKYNKKILQKDPRCLTHMFAAEIFM HRFLLSSPVRTLNPEEADWFYTPVYTTCDLTPNGLPLPFKSPRMMRSAIQLISSNWPYWNRTEGADHFFVVPHDFGACFHYQEEKAIERGILHLLQRATL VQTFGQRNHVCLKEGSITIPPYAPPQKMQSHLIPPDTPRSIFVYFRGLFYDVGNDPEGGYYARGARAAVWENFKDNPLFDISTEHPMTYYEDMQRAVFCL CPLGWAPWSPRLVEGVIFGCIPVIIADDIVLPFADAIPWEEIGVFVAEEDVPNLDTILTSIPPEVILRKQRLLANPSMKQAMLFPQPAQPGDAFHQILNG LARKLPHGRNIY…
VvGT47_29	GSVIVT01008002001	Chr17	6778789-6782640	MSEKSMLPSRFLFCLITISMFLLILSSLFLLQFSNTSFIPNSVFKLILVNSTSKMDALGQGRRKGCDPNQAHLRAFMYDLPPE FHFGLLGWTGKANQIWPNVSNPGRIPSYPGGLNLQHSIEYWLTLDLLSSDTPNIVRPCSAIRVKNSSQADIIFVPFFSSLSYNRHSRLHGKEKVSVNKML QDKLVNFLMGQDEWKQLGGKNHLIVAHHPNSMLDARKKLGSAMFVLADFGRYPVEIANIDKDVIAPYKHVLRSNPVADSATFEGRPLLVYFQGAIYRKDG GAIRQELYYLLRDEKDVHFTFGSVRGNGINGASEGMASSKFCLNIAGDTPSSNRLFDAIVSHCVPVIISDEIELPFEDVLDYSEFCIFVRASDAVKNGFL LNLLRGIKREKW…
VvGT47_30	GSVIVT01010019001	Chr18	13498401-13504533	MGSPNNKHRAFTSHTHHGLCTRTHQIAALALIIVTFFLTRLLDRSFSPCASQASVAQLPGSRTVLRVNGGGSLSWPERGYGSQ LSLKIYVYEEDEIDGLKSLLYGRDGSIPTEVCVTGQWGTQVKIHRLLLKSRFRTRRKEEADLFFVPTYIKCVRMKGGLNDKEIDQMYVKVLSQMPYFRLS GGRNHIFVFPSGAGPHLFKSWATYLNRSIILTPEGDRTDKKDTSAFNTWKDIIIPGNVADEMTTNGATFVQPLPLSKRKFLANFLGRAQRKLGRLQLIEL AKQYPDKLESPELQFSGPDKLGRIEYFHHLRNAKFCFAPRGESSWTLRFYESFFVECVPVILSDQVELPFQNVIDYTQVSIKWPSSQIGPQLLEYLESIP DKVIEEMISRGR…
VvGT47_31	GSVIVT01036850001	Chr18	18019984-18028031	MALKATSFTSTLHPSLCSVSSLFLFTLISILSVSLFFLFTTANQSKSISSQSIISQTTPQASIKVYVVDLPRSLNYGLLDTYWSLQSDSRLGSEADREIRRTQMGKTLKFPPYPENPLIKQYSAEYWIMGDLMTPEKLRYGSFAKRVFDVNEADVVFVPFFATISAEIQLGGGKGVFRKKEGNEDYERQRQVMEFVRGTEAWKRSGGRDHVFVLTDPVAMWHVKAEIAPAILLVVDFGGWYKLDSKASNNSLSEMIQHTQVSLLKDVIVPYTHLLPRLHLSENQIRQTLLYFKGAKHRHRGGLVREKLWDLLVYEQGVIMEEGFPNATGREQSIKGMRTSEFCLHPAGDTPTSCRLFDAIQSLCIPVIVSDNIELPFEGMVDYSEFSVFVAVRDSLLPN…
VvGT47_32	GSVIVT01014123001	Chr19	572713-579099	MPAKFTYDLLWLFRNTYKETSNRTSNGSPVHRLIEQHSIDYWLWADLTAPESERLLKNVVRVHRQEEADLFYIPFFTTISFFL LEPEQWKPLYREALKWVTDQPAWKRSEGRDHILPVHHPWSFKTVRKSMKNAIWLLPDMDSTGNWYKPGQVSLEKDLILPYVPNVDLCDAKCSSESESKRK TLLFFRGRLKRNAGGKIRAKLMAELSGDDGVVIQEGTAGEGGKEAAQRGMRKSIFCLSPAGDTPSSARLFDAIVSGCIPVIVSDELELPFEGILDYRKIA LFVSSSDAMQPGWLLTFLKSISPAQIKEMQRNLAKYSRHFVYSSPAQLLGPEDLVWRMMAGKLMNIKLHTRRLQRVVRESRRLCTCDCKRANFTGP*
VvGT47_33	GSVIVT01003953001	unknown	14012896-14017852	MTAVKSPQQAVASSTLCSIHGSLLTLATLTLISFTYISLKSLHSPFHDPSFNSSPPPQVISRVEHLVEEEDSPFSDIYHSPEI FRLNYREMEKNFKVYIYPDGDPNTFYQTPRKLTGKYASEGYFFQNIRDSRFRTNDPDQAHLFFIPISCHKMRGKGTSYENMTVIVQNYVGSLISKYPYWN RTLGADHFFVTCHDVGVRATEGVPFLVKNSIRVVCSPSYDVGFIPHKDVALPQVLQPFALPAGGNDIENRTTLGFWAGHRNSKIRVILARVWENDTELDI MNNRINRAAGELLYQKRFYRTKFCICPGGSQVNSARIADSIHYGCVPVILSNYYDLPFNDILDWRKFSVVLKELDVYQLKQILKDIPDAEFVALHNNLVQ VQKHFQWNSPPI…
VvGT47_34	GSVIVT01004778001	unknown	16036957-16042128	MKGIKLRLEVLEECEKKTKGEEEENCTFLFPQSSYSLFFISLPLNPDFLFSMASRPRILIWVAFFFFFEFVFCESVVDPDAPE CTNRWIHIRRLPTRFNLDLLTNCSEYPVFDDFCPYLANHGLGQKTHNNSHSWYRTDPLMLELVFHRRMLEYPCLTSDPSAADAIFLPYYGGIDAIRYLFG PEVNSSFEHGLELYEFLQQDSPEVWSRNGGHDHFTVLARPAWDFSQSLDNDPPIWGTSFLELPEFYNITVLTLESRPWPWQEQAIPYPTSFHPVSLVLLD SWVQRVRRSRRTTLMLFAGGGGTSLLPNIRRSIRSECENTLSHFTV*
VvGT47_35	GSVIVT01006274001	unknown	24409833-24415551	MKRLLQLVAVVLMYRINWKKLFVVVAIMTTAGMVLQTYTLPYPMATWFLPPQTMVSSYKSLNGSTVHLTETLSLESAEQFQLV PTAPVVSLNSSTELVKSVPIVEERAQVSPRRNPSSRRRRKNAKIDKTNEQKVVFHPPPPRTVPTRLQRYIWSLPPDEALLFAKREIQNVSTVTDDPELYA SLFHNVSVFKRSYELMETILKVYIYPDGARPIFHAPHLRGIYASEGWFMKLMEENRQFVTRDPKKAHLFYLPYSARQLETALYVPNSHNIRPLSIFLRDH VNMIAAKYPFWNRTHGSDHFLVACHDWGPYTVNEHQELSRNTIKALCNADLSEGIFVAGKDVSLPETTIRNPRRPLRNVGGRRVSQRPILAFFAGNMHGR VRPTLLKYWSDK…

## Sheet: Brachypodium distachyon
CAZy Family _Gene ID1	Model	Chl	Chromosome position	Protein sequence
BdGT47_1	Bradi1g13110.2	Chr1	9934885-9938401	MVSLHGSAVVRAGRYVLALVMPACFVIWMVFFFFPFPSPEVDVVRESFQANINSSAGQQRTVDAPPPPARQERAETPSPPPPARQE RISQARKPARKTEVDRCAGRYIYIHDLPPRFNSHLIRDCRTLSEWTDMCKHMANAGMGPQLTRTGGVLPAAGWYDTNQFALEVIFHNRMRNQYDCLTTDA SRAAAFYVPYYAGLDVGRHLWGVQFNNTVRDALADDLVRWLRASPAWAAHGGKDHFLVAGRITWDFRREDQDGPGEWGSRLLVLPEARNMTMLVIESSPW HGNDVGVPYPTYFHPSRAAEVASWQKAVRRARRPWLLAFAGGARASSGNITNVRDVIMDQCARSRRCGLLRCDGAGRRNDCYAPGNVMRLFKKAAFCLQP QGDSYTRRS…
BdGT47_2	Bradi1g24360.1	Chr1	19564484-19568894	MWERGRPPPRKPRPSPLILPASALVSPPPPRFVFPRSLFALAARAMPSRRPSPALLLLLALALALLFLLLSPSGPSASRLSHSFAS ASSSYPASSPLPSPVKIYLYDLPSKFTYGVVRSYMSARAPPGSADAAATLPDEELRYPGHQHSAEWWLFKDLRRRGPRERPVARVDDPAEADLFYVPFFS SLSLVVNPIRPLAAANASVAAAEPAYSDEAMQDELVEWLERQPYWRRHRGRDHVFICQDPNALYRVVDRISNAVLLVSDFGRLRGDQASLVKDVILPYSH RINPFQGDVSIEARPALLFFMGNRYRKEGGKVRDTLFQVLENEGDVIIKHGTQSRVSRRMATQGMHSSKFCLHPAGDTPSACRLFDALVSLCVPVIISDH IELPFEDVI…
BdGT47_3	Bradi1g47867.2	Chr1	46776494-46778551	MSCSGCNRPGAPGVHMAAASSHLLAVVALFGFFLIFLAVGSRAEAVTAEQLSSPPSSSPQLTTDLTTRGAGTARRRRPSVERELDA ARAAIRRAARRGHADHGGGNASSDWFHGGDSSAEHARLARVYRNPAAFHRSYVEMERRFKVHVYAEGEPPILHAGPCKNIYTIEGRFIEQLELMSPGGAG VRTWDPERAHAFFLPFSVSQMVQFAYVPLSYDRAPLRALVADYVRVVAARHRFWNRSSGADHFMLSCHDWGPEASRGDPELYGNGIRALCNANTSEGFRP GKDVSIPEINLYDGDTPRQLLLPAPGLSERPYLAFFAGGRHGHVRDLLLREWKGRDPDNFPVYEYDLPTTTNTTGGGDKQHDYYSYMQRARFCLCPSGHE VASPRVVEA…
BdGT47_4	Bradi1g54950.1	Chr1	53577926-53584519	MRVSADGTALPCLHGHGGKAACALAVCVAFLTFLVVALDPRTRASSWLLSSSPPAVFSPTLEKPSSRGSSNGGGPLLVTSSSGAAG KKKNSNGKEVLFRAFAVNATSWPGDVHGATPDYVSVAAPAPSPATQESGLGDAANSDGVIQVIPQIHRERDAKLHRLELGLAKARSTIMEASHNKDNRPP LTDKDYVPVGPVYRNANAFHRSYLEMEKLFKIYVYDEGEPPIYHDGPCHNIYSTEGRFIHAMEMENRMRTTDPGLAHVFFLPFSIAKMEKTIYVPGSHTM EPLRRTVFDYIDVLSTKHPYWNRSQGADHFMLSCHDWGPYVSSVDGNLFSNSIRVLCNANTSEGFIPSKDVSLPEINHLNDFKKDIGGPSASGRPILAFF AGGNHGPVR…
BdGT47_5	Bradi1g63740.1	Chr1	63239417-63242225	MAIASGAMAASASCRSPLVWFFSLAAALFFASWYLLLDSAAAPAALDARRQGPRSASPARKCDPATALLRVFMYDLPLEFHFGLLD WKPGGAAAGGGLWPDVRHGVPEYPGGLNLQHSIEYWLTLDLLASEQGAPTPCNAVRVRDPARADVVFVPFFASLSFNRHSKVVPPARTSEDRALQRRLIE FLAARPEWRRSGGRDHVVLAHHPNGMLDARYKLWPCVFVLCDFGRYPHSVANIDKDVIAPYLHVVGNFFNDSAGYDARPTLLYFQGAIYRKDGGFIRQEL YYLLKDEKDVHFSFGSVAGNGIEQSTQGMRASKFCLNIAGDTPSSNRLFDSIVSHCVPIIISDEIELPFEDVLDYSKFCIIVRGVDAVKKGFLINLIKGI SRQEWTSMW…
BdGT47_6	Bradi1g73000.1	Chr1	70862769-70867361	MLTIRSAKCPWVFVGAAGALVMLVATVHVFMVPILPSSLDFFGTRGRTTRPRNVFPGVGVVDSRFRAQFPADSYGAVMFRGAPWKP GVGRWLAGCHAGSSAVNITEVIGAKQCEKDCSGHGVCNYDLGECRCFHGYAGKGCEEVLKLECNFPSSPEWPVGRWVVSICPAQCDTTRAMCFCGPGTKY PERPVAEACGFKTTSPAKPDDPKIPDWKAPDPDVFTTNSSKPGWCNVDPQDAYSSKVEFKLECDCKYDGLWGQFCETRVECSCINQCSGHGQCRGGFCQC DSGYFGIDCSVPSAYSLAYDWPSWLQSPANLPDLNKLSKSPINVNAVVKKKRPLIYVYDLPAEFDSHLLEGRHFKLQCVNRIYDDKNRTIWTEQLYGAQM ALYESILAS…
BdGT47_7	Bradi1g75450.1	Chr1	72620931-72622742	MRRRSVLPSHHDDLDKGGGKPPQSRLCLLATLCVMFWVLIFYFHFSVLPSDADASTTHPVSVATEARIARADPAPDGRVSEPDDPL LAPPAVVSEPPPATLPKEEEMEQEAPTAVVVAQEEAPRREYPFQRALKTAENESDPCGGRYIYVHELPPRFNEDMLRECQRLSLWTNMCKFMSNDGLGPP LGNEEGVFSNTGWYATNQFAVDVIFGNRMKQYECLTKDSSIAAAVFVPFYAGFDVARYLWGYNTSMRDAASHDLVDWLRQRPEWNVMGGRDHFLVGGRIA WDFRRLTDQESDWGNKLLFMPAAKNMSMLVVESSPWNANDFAVPYPTYFHPAKDADVFLWQDRMRSLERPWLFSFAGAPRPGDPMSIRGQLIDQCRTSSF CKLLECDLG…
BdGT47_8	Bradi1g78027.1	Chr1	74415250-74418232	MTRDPKLPKPPLPLPPAARRLAASPSLSDKLRRHSPWLLLLIWFALSFSLFLSAAPPAASPLLRRPPAFLHHKPRALAEETTSAPP PAVRIYVYDLPRRFNRDWLAADPRCARHLFAAEVALHEALLGHYSAVRPEDADLFFVPVYVSCNFSTPNGFPSLSHARGLLADAVDLVRREAPYWNRSAG ADHVFVASHDFGACFHPMEDVAIADGIPDFLKRSILLQTFGVQGPHVCQEAEHVVIPPHVPPEVALEILELEKTRRDIFAFFRGKMEVHPKNISGRFYSK KVRTELLQRYGRNSKFYLKRKRYDNYRSEMARSLFCLCPLGWAPWSPRLVESVLLGCIPVIIADNIRLPFPSVLRWSDISLQVAEKDVASLEKVLDHVVA TNLTVIQKN…
BdGT47_9	Bradi1g78280.1	Chr1	74608540-74609928	MPRHLLITACNFLPILFFFFFFFSSPVVVLTAAALPDPCAGRRVHIRRLPPRFNTDLLGHCSTAFPLADHPSSTPSCASLANHGLG PRTHNRTRSWHRTDGRLLEPFFHRRVLDLPCLAADPAAADAVFLPYYASLDALPFVLEPAMLNFSAIHGVPLAQFLERDRPDVLKRNHGHDHFLVLAGPA WDYAQPPESEPRLWGTTSILRRPEFVNFTFLTLESRAWPWQEHAIPHPTAFHPPTFPRLQAWIARARRSRRTSLMLYAGGVSRPSKPNIRGSILAECANR TDNVCSLIDCSGGACALDPAHYMIPMLRSRFCLQPPGDTPTRRSTFDAVLAGCVPVFFEHASARTQYGWHLPPERYDEFSVTIPKDSVVLGGVVIAETLA AVPEVEVAR…
BdGT47_10	Bradi2g00690.2	Chr2	398305-401441	MPHHAPSSQHALPRKLLTRRRAVASCAAVAVLTAAVILLAAPTSEAPNSALLVGASLLSSLREETHEAPATAAAGSSSPPPLASLV ETILSSRIAPATSMFPAPAPSPVENFDDTSNEEPEHPGVKPISSGPPTSSSNVSGDLDMSGHAAPPPKREILLWSTAADEELLYAKKEIVNAPLVTDDPD LYAPLFLNVSIFKRSYELMERLLKVFIYHDGAKPIFHSPELKGIYASEGWFMKLIEGNQNFVVRDPNRAHLFYLPYSSRQLEHNLYVPGSNTLEPLSIFV KNYIDMISAKFPYWNRTKGADHFFVACHDWGPYTTKLHDELRRNTIKALCNADLSEGVFIRGRDVSLPETFVRSPRRPLRDIGGKPATERSILAFFAGQM HGRVRPILL…
BdGT47_11	Bradi2g44880.1	Chr2	45307790-45310774	MVSASCCRVVGLGSLLAAAAATTAFLTFSLPSSNGVSTAKLTVAVSVNASSTPPPPPPPPPPTLATALPPPPPPPPPVARPRKREP SYGRMTPEEALRYAKKEIMAAEPVVNDPDLYAPLFRNVSQFKRSYELMERILKVYIYQDGRRPIFHTPPLSGIYASEGWFMKLLKESRRFVVADGAKAHL FYLPYSSQHLRLSLYVPDSHNLRPLAVYLRDFVQGLAAKYPFWNRNRGADHFLVACHDWGPYTTTAHRDLRRNSIKALCNADSSERIFSPGKDVSLPETT IRTPKRPLRYVGGLPVSRRRILAFFAGNVHGRVRPVLLKHWGDGRDDDMRVYGPLPNRVSRQMSYIQHMKNSRFCLCPMGHEVNSPRIVEALYYECVPVV IADNFVLPF…
BdGT47_12	Bradi2g53000.1	Chr2	52253310-52258111	MAGKQFPSLAHTRPASSRCLFAVGALLLFSAVYFLLLSPAKPGPIGSPISNPSITTSFVASLDQFLDSPYYPAVSSPAPSDLDAAI RKEEETRLYGDPGGLWPAAHAPLRVYVYEMPRKFTYDLLRLFRDSYRDTTNLTSNGSPVHRLIEQHSIDYWLWADLIAPESQRLLKNVIRVQQQEEADIF YVPFFTTISYFLLEKQKCKALYREALKWVTDQPAWQRSEGRDHIIPVHHPWSFKSVRRFVKKAIWLLPDMDSTGNWYKPGQVYLEKDVILPYVPNVDLCD YKCASETQSKRSMLLFFRGRLKRNAGGKVRSKLVTELKDAEDVVIEEGTAGAEGKVAAQNGMRKSLFCLNPAGDTPSSARLFDAIVSGCIPVIISDELEL PFEGILDYR…
BdGT47_13	Bradi2g59047.1	Chr2	56844543-56847549	MMAAPSSRAVAIGGSLLLLLVFALSSTVIYLTSSGPAASPSSILLNLRPAKCPPAPPLRVFMYDLPARFHVAMMTTAANGSGGEGF PAWPPSAGGIRRQHSVEYWMMASLQGGGGEGKFGAREAVRVADPEAAEAFFVPFFSSLSFNVHGRNMTDPDTEADRLLQVELIDVLWKSKYWQRSAGRDH VIPMHHPNAFRFLRDMVNASVLIVADFGRYTQELASLRKDVVAPYVHVVDSFINDDPPDPFEARPTLLFFRGRTVRKAEGKIRAKLAKILKDKDGVRFED SLATGEGINTSTEGMRSSKFCLHPAGDTPSSCRLFDAIVSHCIPVIVSSRIELPFEDEIDYSEFSLFFSVEEALKPDYLLDQLRQMPKEKWVEMWSKLKN VSSHYEFQY…
BdGT47_16	Bradi2g59380.1	Chr2	57147137-57150704	MGVTGRPSAAAVLLAGAVACCAALAVAAQTQQQQQRKHVRISGNAGDVLEDNPVGKLKVFVYEMPRKYNQYLLEKDNRCLYHMFAA EIFMHQFLLASAVRTMDPEEADWFYTPVYTTCDLTQQGFPLPFRAPRMMRSAVQYIAATWPYWNRTEGADHFFLAPHDFGACFHYQEERAIERGILPVLR RATLVQTFGQRNHVCMQEGSITIPPYANPQKMQAHLISPGTPRSIFAYFRGLFYDMGNDPEGGYYARGARASVWENFKDNPLFDMSTEHPSTYYEDMQRA IFCLCPLGWAPWSPRLVEAVVFGCIPVIIADDIVLPFADAIPWDQISVFVPEADVPRLDSILASVPPEDVLRKQRLLASPAMKQAVLFHQPAQPRDAFDQ VLNGLARKL…
BdGT47_15	Bradi2g59400.1	Chr2	57162207-57165094	MGNQRAVLALLAAAALLSCSVSAQDTERIEGSAGDVLEDDPVGRLKVYVYELPTKYNKKMVAKDSRCLSHMFAAEIFMHRFLLSSA IRTMNPEEADWFYTPVYTTCDLTPWGHPLPFKSPRIMRSAIQFISSHWPYWNRTAGADHFFVVPHDFGACFHYQEEKAIERGILPLLRRATLVQTFGQKD HVCLKEGSINIPPYAPPQKMKTHLVPPETPRSIFVYFRGLFYDTANDPEGGYYARGARASVWENFKNNPLFDISTDHPPTYYEDMQRAIFCLCPLGWAPW SPRLVEAVVFGCIPVIIADDIVLPFADAIPWDEIGVFVAEDDVPKLDTILTSIPMEVILRKQRLLANPSMKQAMLFPQPAQPGDAFHQILNGLARKLPHN KGVYLTPGQ…
BdGT47_16	Bradi2g59410.1	Chr2	57168592-57172500	MARWGLAAIAVLVAAAALFVAAEAQAAQQGHQTERISGSAGDVLDDNPVGRLKVYIYDLPGKYNKKLLKKDPRCLNHMFAAEIFMH RFLLSSAVRTFNPEEADWFYTPVYATCDLTPSGLPLPFKSPRMVRSAIQLIAEKWPYWNRSEGADHFFVAPHDFGACFHYQEEKAIGRGILPLLQRATLV QTFGQKNHVCLKDGSITIPPYAPPQKMQNHLIPGDTPRSIFVYFRGLFYDTSNDPEGGYYARGARASVWENFKNNPLFDISTDHPPTYYEDMQRSVFCLC PLGWAPWSPRLVEAVVFGCIPVIIADDIVLPFADAIPWEDIGVFVSEDDVPKLDSILTSIPTDVILRKQRLLANPSMKQAMLFPQPAEAGDAFHQILNGL ARKLPHGEN…
BdGT47_17	Bradi3g06390.1	Chr3	4607796-4610992	MAGRLGGAGSSSPLPRALLLLAAAALFSLSFLTLRSLRPAAVPSISLDESRLLAPPFSPAPPRPSVYHSPEAFSAGYAEMERSFKV YIYPDGDPKTFYQTPRKLTGKYASEGYFFQNIRESRFRTEDPDSADLFFVPISPHKMRGKGTSYENMTIIVKDYVEGLINKYPYWNRTLGADHFFVTCHD VGVRAFEGLPFMVKNSIRVVCSPSYNVDFIPHKDVALPQVLQPFALPKGGNDVENRTNLGFWAGHRNSKIRVILARVWENDTELAISNNRISRAIGELVY QKQFYRTKFCICPGGSQVNSARISDSIHYGCVPVILSDYYDLPFNDVLDWKKFAIVLKERDVYELKSILKSISQEEFVALHNSLVQIQKHFVWHSPPIPY DAFHMVMYE…
BdGT47_18	Bradi3g28006.1	Chr3	29372470-29374014	MKPCSVPTIERYAAGDNGDSKHPNKGDGAGLLIRPSRLFYLTVLSTAFWTLVFYFNSTAQGNVASTVLFKRSAFSLPSSFRFVRDR CAGRYIYMYDLPARFNADLVPAYQKHSPITDMSNDGLGSPITPDQDGAGFLPEKGAYDTDQHVLGMIFHARMKRYECLTHDPAAAAAVFVPFYAGFDASM RLWKTDLPERDALARDLVEWLTRRPEWRAMGGRDHFLVAGRVAWDFLRGKDDNGWGTTFLTFPAIRNTTVLSIEASPWVGHDFGVPYPSHFHPASDADVA AWQGRMRQAGRKWLWAFAGGPRPGSKKTVRAQIIQQCSDSSTCATFASATGHHNSPGRIMALLESARFCLQPCGDSFTRKSTFDAILAGCIPVYFHPLSA YVQYTWHLP…
BdGT47_19	Bradi3g28012.1	Chr3	29377447-29379006	MTATFATKIHEDPDPVDAANKPDGSGAVLRPFRVCHLTVLATAFCALVFYAHYAIRGNMASALFKPPVTISSSSLPLLSSTSTIDP SLQPEKPATNRSAAAPASESDHCDGRYIYMYDMPPRFNDDLVRHCGKGELHPWLDMCPYVANDGMGEPLGDEGGVFPGHGWYATDQFTLDLIFHSRMKRS YECLTNDTTLAAAVFVPFYAGLDAGRFLYNHSTSIRDKLQLEFIDWLVNRPEWRAMGGRDHFLVAGRTTWDFRREADVDALWGTKLLTHPAVKNMTAFVL EKSPSSRNNFAIPYPTYFHPEAAADVVAWQQKVREIPRRWLFSFAGAPRPGSNKTVRAELIRQCGASSLCNLFHCGGKDGDGAADCNSPGGVMRVFEGSD FCLQPRGDT…
BdGT47_20	Bradi3g28020.1	Chr3	29394378-29395927	MEKSGAVPRWRFLLLVAAAFWVCILYFRMSLVLTGVAVEHTVSYAPGYDNRRGGDDADPCRGRYVYMHELPPRFNAEILRGCGSTD GRWPDMCEQLSNAGLGQPLGDEIGAGQTKGDYVGLTAAGGWYATHQFALDAIFHGRMRRHRCLTNDSSKAAAVFVPFYAGFDFVRHHWGYDDATRDAASR DLARWLVRRPEWRRAGGRDHFLVAGRTAWDFRRDTNLNSNWGTNLLLLEATKNMTVLVVESSAPGHGNDAAVPYPTYFHPRAAADVLDWQNRIRNADRPW LMSFVGAPRPGDPRSIRSQIIAQCGAASSACQQLGCAFGASQCHTPAAIMRLFESSVFCLQPPGDSYTRRSAFDAMVAGCVPVFFHPASAYLQYTWHLPR DHARYSVYI…
BdGT47_21	Bradi3g28027.1	Chr3	29398499-29401567	MEKSGAIRRPRFLLLVAAAFWVWILYFRTSLVLTGVAMEHAVSSAPGYGYQSPGGDDDVPCRGRYVYMHELPPRFNAEMLRGCGNT DGRWPDMCEQLSNAGLGQPLGAATESQKKGDDVGLTAAGGWYATHQFALDAIFHGRMRRHRCLTNDSSKAAAVFVPFYAGFDFVRHHWGYDDAARDAASR DLARWLVRRPEWRRAGGRDHFLVAGRTAWDFRRDTNLNTNWGTNLLLLEAAKNMTVLVVESSAPGHGNDIAVPYPTYFHPRADADVLDWQHKLRNADRPW LMSFVGAPRPGDQRSIRSQIIAQCGAASSACQQLGCAFGASQCHTPAAIMRLFESSVFCLQPPGDSYTRRSAFDAMVAGCVPVFFHPASAYLQYTWHLPR DHTRYSVYI…
BdGT47_22	Bradi3g28040.1	Chr3	29408063-29410074	MKRHHAADLPASSGGEMHAGTGKAACKLDKGRSTSSCPRLCCLLVLCTTVSMLVIHCYDYGHADTGVEHGRSSSSSPLHGIRKMSS ISAKPANNGDRIRGDLCAGRYVYVQELPPHFNSDMARDCEALSEWTEAGKCKHTANGGFGPPQPSSGVEETVLFQGQETGGWYDTEEHALDIIFHDRVKR YECLTADSSLASAVFVPFYAGLDVARHLPGKGRYHVATRDEMALAMVEFVTARPEWRALGGRDHFFVAGRGTWDFRRSQDDGGGWGNKLFLLPAVRNMTA LVVEASPWHLNDAAVPYPTGFHPTTDEHVFLWQHRLRELKRQSLFAFFVSGAPQGTEEDPKSVSSHLVKQCAASSACSLVRDEDSSPAAAGIMKLYQSST FCLHPRGGA…
BdGT47_23	Bradi3g32610.1	Chr3	35034367-35036880	MLDRSTPPSPPAMRDPKPKPAGAQQQPNHIDKSRKHCSWLWLLWASLSAYLFIPALRHSSSDQPPRPAGAGVRIYVYDLPPRFNRA WVSADARCGRHLFAAEVAVHEALLRRHLRARPEEADLFLVPVYVSCNFSTPTGLPSLKHARGLLAEAVELVRRDMPYWNRSAGTDHVFVASHDFGACFHA MEDVAIAGGIPEFLKRSILLQTFGVQGRHTCQEVEHVVIPPHVLPEVARELPEPEKSHRDIFAFFRGKMEVHPKNMSGRFYGKKVRTKLLQLYGHNRKFY LKRKQHDGYRLEMARSLFCLCPLGWAPWSPRLVESVLLGCIPVIIADNIRLPFPGVLRWPDISLQVAERDIANLEAMLDHVASTNLTTIQGNLWDPVKRK ALVFNQPME…
BdGT47_24	Bradi3g32980.1	Chr3	35400170-35401835	MPNPVLLLLLPVLLHAVAAVSSEDSAEDPCAGRRIHIRALPPRFNTHLLRHCDAAFPLADPSASAPPSCASLANHGLGPRTHPRSR SWYRTDARLLEPFFHRRILERRCLAADPALADAVFVPYYASLDALPYLLDPALLDSSASHGASLAEFLAHDRPQILSRRHGHDHFLVLAGSAWDHSQPPE LEKGQQPRMWGSTSLIRRPEFENFTVLALESRTWPWQEHAIPHPTSFHPSSLRRLQAWLDRARRSRRPVLMLFAGGVSRPSRPNIRGSILAECANRTDAC VVVDCSAGKCAHDPVRYTRPMLRSRFCLEPPGDTPTRRSTFDAILAGCVPVFFEDAAARRQYGWHLPPARYDEFSVYIQKETVVLGGVRIAETLAAVPEA EVRRMRERA…
BdGT47_25	Bradi3g37030.2	Chr3	39410848-39413324	MVVERKMQPSPPPEHRRVLRFVTFFALSLLAFSCWALVSSRINRAILIAADADETPLLAGDHGTPLIPAAVPASNNLRISDPAVRE TPPLARGRGEGRGEGSSSSSCDADNAQLRVYMYDLPPEFHFGMLGWDAKKAAAAGAWPDVRDTGGVPHYPGGLNLQHSVAYWLTLDILSSTAPGFDGRPC VAVRVTNASQADVFFVPFFASLSYNRHSKLQGKEKMSRNRLLQAELVKYLARQEEWRRWGGKDHLVVPHHPNSMMQARKKLSAAMYVLSDFGRYPPDVAN LKKDVVAPYKHVVRSLRDDESPTFDQRPVLAYFQGAIHRKDGGKVRQKLYQLLKDEKDVHFTYGSVRQNGIRRATKGMASSKFCLNIAGDTPSSNRLFDA IVSHCVPVM…
BdGT47_26	Bradi3g44420.1	Chr3	46305237-46308236	MAGARHGWLPMATLLVATCFYPLLLPPAAAAAEVDGRDAQRNTERISGSAGDVLEDNPVGKLKVFVYDLPSKYNKMIVTKDPRCLS HMFAAEIFMHRFLFSSAVRTVNPEEADWFYTPVYTTCDLTRAGLPLPFKSPRMMRSAIQFISNKWPFWNRTDGGDHFFVVPHDFAACFHYQEENAIARGI LPLLRHATLVQTFGQKNHVCLKDGSITIPPYAPPQKMQAHLIPPDTPRSIFVYFRGLFYDNGNDPEGGYYARGARASLWENFKNNPLFDISTEHPATYYE DMQRSVFCLCPLGWAPWSPRLVEAVVFGCIPVIIADDIVLPFADAIPWDEIGVFVDEEDVPKLDSILTSIPIDDILRKQRLLANPSMKKAMLFPQPAQPR DAFHQILNG…
BdGT47_27	Bradi3g47480.1	Chr3	49188986-49190473	MEAHYHNKCLLYALLLVGSWICSFLLHLQFFHLSLLRYSFPYYHRLRAASVPLEATFASSHAFAQDFTSSRRSPSCDGRYVYMLDI HPRFDLLNACVDGSSSLLEDEHGACVLMSNAGLGPALAPAASGDDGVISSNGWFNTNQYSLEVIFHNRMRHYECLTDDPASSSAVYVPYYPGLELNRHAC EANATERDGPSGEFLRWLSSRPEWAAHGGRDHFMVVAKTTWMLRRRVQPDEEAGSCGNRFLDRAEPRNMTVLTYESNIWDRRDMAVPYPSYFHPSSSGAV SAWQARARAAPRPWLFAFAGARRPNGTLLLRDRVIDTCVSVPARCGMFGCDSQRGGLEGCRSPEKLVALFLSARFCLQPRGDSFMRRSSVDAVIAGCVPV FFHEASTFE…
BdGT47_28	Bradi3g48620.1	Chr3	50072499-50074206	MEKKGGRRRGAGNAIAVPPLLAFVVVAPAVVFMLQSAVSGGGSATGSHTQDRRRRLREQSPLPQHVPGETQKASLQLPVKVVGGAI ERGLARSRAAIRRAARAAPNGVESVRRIRSFKDASDAFVPRGAIYRNARASHRSYVEMEKRLKIWTYSEGEPPLAHLAPGTDIYSIEGQFLAEMEEPLNR FAARHPDEANVFLLPISVCNLVHYVYRLNTTAHLAPLRKLLADYVAVISDKHPYWNRSGGADHVLVSCHDWAPLVSEGSPELRDNAIRVLCNANVSEGFV PRKDATLPEVNLADGVLRLPTQGLPRQNRTTLAFFAGGMLGEIRRALLEQWAGREDPEMDVHEYLPPHGGGPGYDDYHALMGRARFCLCPSGFEVASPRV VESVFAGCV…
BdGT47_29	Bradi4g26150.1	Chr4	31532840-31535666	MTMAPPRARALLLPLAAATVLVASTIFLFAAAAWRGGPSADSGLPVPSTSAGFLSVPVSARVPSVGKGHELSFLDENGLPDDPGSG SVSVSVSAPPRCDPRDAAVRVFLYDLPPEFHFGMLGWAPTGDDGGGAVWPEVSAAPRYPGGLNQQHSVEYWLTLDLLASSSAAGLPCGAAARVADAQDAD VVFVPFFASLSYNRHSKPVPPEKVSRDRALQEKLVRYLAARPEWKRSGGADHVIVAHHPNSLLHARSALFPAVFVLSDFGRYHPRVASLEKDLVAPYRHM AKTFVNDTAGFDDRPTLLYFRGAIYRKEGGNIRQELYNMLKDEKDVFFSFGSVQDHGVSKASQGMHSSKFCLNIAGDTPSSNRLFDAIVSHCVPVIISDD IELPYEDVL…
BdGT47_30	Bradi4g40070.1	Chr4	44697257-44701575	MEAHYPKYVLYGVLIVGSWLVSSILHFQFFHLSLFSSSRLRGVALLAVDEPPVPAISLNASFIGLPENPPATVVAEDNGAAAACEG RYVYMVDLPSRYDVLRDCVEGSPEFDKWYSQCTLMSNAGMGPALPAPTGDGTDGDTGLIGPDAAGWYNTDQYALEVIFHNRMRRYPCLTGNPSSATAVYV PYYPALELQQHLCGDTNSDARDRPSSEFIQWLSSQPRWTTLGGRDHFLVASKTTWMFRRLVQQGAGGEKKNRYCGNNFLDSHPETANMTVLTYESNLWST RREDFAVPYPSYFHPSSADAVSAWQARVRSAPRRWLFAFAGARRANGSRCGRVDCGEGHGDLEGYITCRTPRRLVSIFGASRFCLQPRGDSFMRRSSVDA VMAGCVPVF…
BdGT47_31	Bradi5g08400.1	Chr5	11179035-11181680	MGSSTGWLPVALLLAAVALSSVLSPPAAAAAEADGADHAVQQHSERISGSAGDVLEDNPVGRLKVFIYDLPRKYNKKMVAKDPRCL NHMFAAEIFMHRFLLSSAVRTLNPKEADWFYAPVYTTCDLTPAGLPLPFKSPRVMRSAIQYISNKWPFWNKTDGADHFFVVPHDFGACFHYQEEKAIERG ILPLLQRATLVQTFGQENHVCLKEGSIIIPPFAPPQKMQAHLIPPDTPRSIFVYFRGLFYDTGNDPEGGYYARGARASLWENFKNNPLFDISTEHPATYY EDMQRAVFCLCPLGWAPWSPRLVEAVVFGCIPVIIADDIVLPFADAIPWEEIGVFIEEKDVPKLDTILTSMPIEDILRKQRLLANPSMKQAMLFPQPAQA RDAFHQILN…
BdGT47_32	Bradi5g18927.1	Chr5	22123450-22125669	MPESPTSPAAKPLSPPGSPLNAPTPSAASALLRATVLFLAFLALQLVLFKSLLRFPSTRFLPAPGRCSSTWANGAADVGACKAGLI YVYDLPPEFNHDLVTHCGRLWPWYSFCPYLTNGGFGRPSTESPAFSSLVPNASLPNWYNTDQFPLEVIIHRRLLSHPCRTTDPSLAAAFYVPFYAGLDVG SHLWGLNSTVADRDRAGTRLLGWLRNQTAFKSSGGWDHFITLGRITWDFRRYDVHGWGTNFVLMPGMENVTRLVIEGDRQDAMDVGVPYPTGFHPRGARD VRAWQRHVLSRNRTRLFGFAGAERSGFRDDFRKVLVGECEDAGHAHCRSVNCRGTRCNNDTAEVTGLFLESKFCLQPRGDSYTRRSLFDCMVAGAVPVLF WRRTAYDQY…
BdGT47_33	Bradi5g20997.2	Chr5	23874926-23878067	MRGPHHPPCTRAHQAGALLLVGVTFLLTRLLSVPPPFPTARHASTAPWPWRGLTSHDDDHLRIYVYADDEIDGLRALLRGRDATVS PATCLKGQWGTQVKIHQLLLKSRFRTLDKDEAHLFFVPSYVKCVRMTGALTDKEINQTYVKVLSQMPYFRRSGGRDHIFVFPSGAGAHLFRSWATFLNRS IILTPEGDRTDKRGISAFNTWKDIIIPGNVDDSMVKPDARAVQPIPLTKRKYLANFLGRAQGKAGRLKLVELAKQYPDKLESPELKLSGPDKLGRIDYFK HLRNAKFCLAPRGESSWTLRFYESFFVECVPVILSDEVELPFQNMIDYTEISIKWPSSKISPELFEYLESIPEERIEEMIARGREVRCLWVYAPDLEPCS AMAAILWEL…
BdGT47_34	Bradi5g25660.1	Chr5	26983984-26987443	MPPPPVSSKIWRPAMKPPALLAVLLLLSLSFLLFLLRPTSPPFLLSAQTSGTDRRRLSVYVTDLPRALNHGLLDLYWSLPTADARI PASSDPDHPPPRAHPPYPASPLIRQYSAEYWLLASLLRPGPASSSAVSVVADWTEADVVFVPFFATLSAELELGWGATKGAFRRKEGNADYRRQREVVDR VTAHPAWRRSGGRDHVFVLTDPMAMWHVRAEIAPAILLVVDFGGWYKLDSKSAGSNSSHMIQHTQVSLLKDVIIPYTHLLPTLQLSENMDRPTLLYFKGA KHRHRGGLVREKLWDVMINEPGVVMEEGFPNATGREQSIKGMRTSEFCLHPAGDTPSSCRLFDAVASLCIPVIVSDDIELPFEGMIDYTEFSIFVSVGNA MRPKWLASY…

## Sheet: Physcomitrella patens
CAZy Family _Gene ID1	Model	Gene name	Chl	Chromosome position	Protein sequence
PpGT47_1	Pp3c1_5560V3.1		Chr1	4188708-4191582	MWKRSKSANRPSQCCKDHGIRKSCFLLAITLFVICAVSGFSFYRHHSGRETEGSRKISTVSYFPYLRLNKQSLETNVAGEETPLTG SELDEASESDVASFLESFDVGSQGDSEDEVQGCNYWQAELKVYMYDLSSEFHYGLIPGYEVEKGQYWPRNGSEIPEYPGGLYQQHSPEHWLTSDLLTSNM ADRNTACTAFRVADWRDADVIFVPFFASLSYNRFGKASEEKRLTDLIKDQNDVLQLKLVKFLEEQPAWKASGGRDHVFVIHHPNSMQATRNRLRNSLFIV SDFGRYDSEVANIQKDVVAPYKHVIPTFDFDDSSFHTRKILLFFQGAIVRKEGGKIRHELYRLLKDKPGVRFTTGNTALDGFQSATIGMRSSKFCLNMAG DTPSSNRLF…
PpGT47_2	Pp3c1_25640V3.1		Chr1	18545090-18549704	MEDGNSQESNQISDVVKVTEWFGESQSTIPVQREVRGEEPVSTTLEQEEIDESETKENDIIAKEDSTPSHGGDNVGTGTSEE LVTSTLRETVDVASNASDGKNVVEQVPTESIDNGEVSNQKPVSSSAEEETPAITETKKEEVQNVSDTSGELVSSTLEEKLDVSPNTNDDKTVGEHVPTES TYNVEVTNQEPAFASAEEETPAVTEARNEEVRNVSETSEELMSSTLEEKVDVAPNANDDKNVEEQAPTEPTDNGEVTNQEPVSTSSEGETPATTESKNEE VQKDSDTPLQSSDSLQERSEELVLAAPKVENPSVSEQKNEGSLVAVESAQSDDNDQEWKEHKTTKQEPIFTTPGLETPAVIEAKNEENSEGVNSTQSPDN GAVLEEKNEWNQN…
PpGT47_3	Pp3c1_29970V3.1		Chr1	21341615-21345118	MSSFPKQRVAIITFVYCFAVAIICGTWSPDGNFGRSSGFALELQPVLGEPEDGSSISSSYGALTVGARKLTEAKAETDPSEEKKV SSDSIFSLEITEDDHVVLDLRSTLPRLYHSPEFFAMNYNDMAKNLRIYLYPASQNYNFTQYEYGMNPSEMVSELGVETSSTTDTFFNLLVESKRFVTDDA DGAHLYFLPISIDRVWAAVGPAKVGEHLRHYLQWLRNTYKLWDLSLGADHFYFSSHAYDPINHRNNLELTKNAIQVASSPLRRNQNFFPHKDISLPSYKS QHIAEVQNLVGASQRPKLVFVSSPPEDIDPIVASVIQKWTSDSDFHVESADQPSPPFEKLLSSRFCVSVSPQAMLNVVDSLRLGCVPVLIADSIIYDLPF QDVLNWKEFS…
PpGT47_4	Pp3c1_30010V3.1		Chr1	21371253-21372410	MVSTPDPVSVWDMAEPDFLALHRSLPKLYHSPEVFTLSYEEMWIQLQIWVYPSQAGNTSYEHKFDGRKDVMEELSSTADLFSRLL LRSKFSTELPQKAQLFLLPFSIDALRVDLGPSRISDHLRRYVQNVRTSYPYWNLSLGANHFYLSSQAFENNNKHRNVLELEKNSIQAACAPLRQNQNFYP HKDFIFPRYKPITQTEFYAALEGRTSRTVLAYFGGTLADTPALVFILDAWKSDPDFEVEVDPSPHRISVYRQLARSKFCVNVPSRDTFDFVDAIRFGCVL VLLSKSVFLDLPFQGFLDWRQFANYREMQYLGHEARKHLEWNNPPVPYDAFYMTLLELWERRHSIKCGRRNLNSATAVS*
PpGT47_5	Pp3c1_41910V3.1		Chr1	29341631-29344980	MSTIKEAPGPRLSPYLQCFYGLFNLLFLCVMILSFLSVSGTFSRSPEAQTSNLTTISRSSLLHTNIVPTQGSSTSARSVIDTISS CSMDNCFNYSRCDKMEELLVYHYDSQYSPDWYFKDALKRSPYYTTNPAEACLFLVVDRRRVGGPPLSRLPYWNHGLNHVVISVVDKPRNPDARSIEMAST MTSITHQTIYRAGFDVSVPLPQRKFYPNLQRLSAMGRKYLLTYKGNRCLEVGSRGGRVCIDPVLRGMHNGKDIVVVTTCKQVSSNEVAKVEARCAKDQFV YDQYKFDDLINSTFALVPAGSGVSSYRLMEVLSAGSIPVAISESIVLPFDSLIEWRRCLFVFPPSQMHRIVPTLQTLNKDEIEFRREHCLFIYRQFFGSD DKVVATTAMA…
PpGT47_6	Pp3c2_6500V3.1		Chr2	4265101-4267817	MGLISREISVPTVVVSYLTLLLAYGFLLTAITCSRAPRELSVNQSPPTVISQISNNDSSKLALAHGRSLLSLESEDKLEGMPKVGV EVSISDPVSALDISELDLIALHESLPKLYHSPKVFTLSYEEMREQLQIWVYPTQAGSTKYEHNYDGDEDVTEEISSTADLFFRLLTRSEFVTEKAKRAQL FLLPFSIDVLWVDLGPTQVAEKLRRYLEKVRTNYPYWESSLGADHFYLSCHAFEHNSKHRNILELGKNSIQAACAPLRHNQKFYPHKDVVFPQYKPVGEE DVRQAILGRRNRTSLAYFSGCPDVTTPLLSAFHTWETDPDFIVEANPSPHRLSVYRNLARSRFCVSVLPHDTFSLVDALRFGCVPVLLSKLTFHDLPFQG FLNWGQFAV…
PpGT47_7	Pp3c2_6740V3.1		Chr2	4419263-4423308	MEHPLECADSCSLAMSWFCNKKCRGWGLMKRTVVASGLRSVVLLLLFIYFVQDVTAEMGHQRISGSAGDVLEDNPVGRLKVFIYDI PSKYNTDWLKKDPRCLTHMFAVEEYLHDFLTESPVRTLNPEEADWFYTPVYTTCDLTPNGLPLPFKSPRVMRSAISYISSHWPYWNRTDGADHFFVVPHD FAACFHYQEEKAIERGILPLLKRATLIQTFGQNHHVCLKEDSIVIPPYAPPERMQTRLNPPSTPRSIFAYFRGLFYDPGNDPEGGYYARGARAAIWENFK DNPLFDISTEHPATYYEDMQRAIFCLCPLGWAPWSPRLVEGVIFGCIPVIIADDIVLPFADAIPWEKIGVFVEEKDVPILDKILCTINHEEVLEKQRLLA NPAMKQAML…
PpGT47_8	Pp3c2_8340V3.1		Chr2	5747567-5753580	MAGSSLYTGLWKSDDGSITRLKRSCSHPLKVYMYDIPRKFNFGLMTMDNKNEDLPWGNHAAPPWSQQWEVNKQHSVEYWMTVYLLD GWDRKDGRRAAIRVRDPYQADVFFVPFFASLSFNNYGYGMEGPGAELDKNLQECVVNILLNSKWWKASQGRDHVIVLHHPNAFRHYRHLLNSSMLIVADF GRFSTDVACLQKDIVAPYEHVVQSYVDDHSNSFSQRHILLYFQGRIHRKADGIVRAKLAKALMNEKDVHYMDSEASSEALAEATSGMRSSRFCLHPAGDT PSSCRLFDAIVSHCVPVIVSDRIELPFEDDIDYNEFSLFFSSEEAVRPQYLLRILRGINETKWTQMWTKLKAVSHHFEFQHPAKKDDAVNMIFKQVQRS*
PpGT47_9	Pp3c2_14440V3.1		Chr2	9778990-9783009	MNTVDEQSYRIDKIMKRGVGSGSRENLLSKAFAVEQVAVPVHDSPPSSSNEVKLTCPPRLRLWRGFEELTTRHFIISIVCLLSIF ALSGSFMFTNSVRYSTKLFGGSYIDYRPQLSLSDQNSWPFKSAWERSGLVDDEDEGSGKANLGSSRSGLDNEQNTNAGVGAGREGYAGGGGGTAPPGCTE RSAKLKLFMYDLPPEFHYSMLVEQAYTGGQIWPKNISDIPPYPGGLYQQHSPEYWLTNDLLTSNMAGRQSACTAFRVNDWRAADLMFVPFFASLAYNRYT KSEHKVGGELDLVGDKNQKLQEKLLKFLEQQPAWQASGGSDHIVVIHHPNSFHAMRNFFSKAIFIVADFGRYPSEVANLRKDVVAPYKHVIPSFVDDSTP FEEREILLFF…
PpGT47_10	Pp3c3_1830V3.1		Chr3	1095751-1099034	MKPVETGQFGHHRGDGSDHKCCSSSRSSCSNPRATLCPSSSASAIATRISLLIVCAFTIFLVFFCDDYTEHATTSRNVLLMHDHPA STREQKPAELELQENSAKLTSSCKGRLVYVYNISEVYNREFVRECASFKKGRDLCMYMENLGMGRGFGFGVDHGGPVGGESEQGPWYNTWQFALELYFHE RLLRHPCVTERKDLATAFFLPYYAGMDLSRRFTHRLAKDELYMNLGKWLQGRESWKLREGRDHFMVLGRIASDFHREGGDRDWGNRMLRQKAFKEMVVVA IEHTYGRFREGASIDNEIAIPYPTYFHASSDGEIQSLIAWLGQGLQRVSLATMAAGQRSPSTNKMRYRLMTQCGDDPRCTLLRCVGHESSSSLPDQIGNI SSSMKLEGK…
PpGT47_11	Pp3c3_2340V3.1		Chr3	1379733-1382326	MVQVPVWKEGMPDKPKILISRFRTKCVLVSIGLVLWWSLVVVRFSYDRRPLPLQTSIGQPLRSLHKDDTEPRESPIGTSQQDYSTS AEGFSGIEVLESNKTWHTNSEGCQDESNGDKKLDCVLSPGERMPPVIAVSQSHSAEKPSPFVEQPVKDLCEGRYVYVYELDPCFNEDFVTQCEKVLWETM CPSVTNAGLGPPLDNIDDVLSDLDWYATNQFMLELIFHNRMRQYKCLIRDSSRADAIFVPFYAGLEITTKLWGANIAERDDAPEKLQSWLANRAEWKRFN GHDHFLVAGRITWDFRRPSDQETDWGNKLFVSPLGANMTFLTIEASTWDDNDFAIPYPTYFHPSSKTSIVHWQNKMRAIDRPFLFSFVGAPRPALSYSIR GNIVNQCIH…
PpGT47_12	Pp3c3_7840V3.1		Chr3	5437088-5438565	MVAVVCALLLTGRLLWCFTYLINGDETGILVGPHRTNTSRADAGVLGNRESHGSIKVEEI FPRAAVQEEVTRDNEEEFEDDIKDNKADGIEGSSEGMTYAEEKLEVETKIGEETTETVNI DLNPGDEGEIDEEEALTRDNEDQEGSVRMDKFPDAIAYLEELAANLTSKGVEDDDGPYHS RRIFESDFAAMKRNFRIFVYPHDERNPFHDPSKADFFLMPISITKARLDKRIDVGGLQKF CTKYVQDMRSQWNYWNRSSGTDHFYLSCHSIARNAMDGIPEVRQNAIQLLCPASYFLAYN ITHKDASVPQIWPRIGREPKEVGTITQRTRLAFFAGALNSPARQLKDILEAVTPQHYAKL HKHVLQARKHFIWHTPPEEHDAFNTVMYELWKR…
PpGT47_13	Pp3c3_17750V3.1		Chr3	12342150-12346704	MHRVSVVEWKGNGHRGIVSYGTVTSFSKHYKHEATAMSHSFWKKRRSIWLSICILFTVFVLCVSVLPAPMDVSENLETGPLELLR KGLPIEKKSYVLHERMDGLEKSRKEWQLKPDHFTFYNTLRNVPTPFNPLNLTNGIRVYVYDLPQKFNKDWLVDERCSNHLFASEVAIHKILLSSPIKTLN PYEADFFFMPVYFSCKFSSKTGFPRLGHAPKLMEDAVNHVSSMMEFWNRSGGKDHVFVAAHDFGACFHSLESEAIAHGIPEIVQSSLILQTFGVHGFHPC QAAENIQIPPYISPSTVFSYVKKPPEEQRRNIFAFFRGKMEINPKNVSGLVYSRGVRTYIYKKFSRNRRFFLKRHRADNYQLDLLRSTFCLCPLGWAPWS PRIVEAVAYG…
PpGT47_14	Pp3c3_21190V3.1		Chr3	14626824-14630403	MKMFARKFSKQYHLRKPRAKYIYVCCSLSFLLILITGWSRPLPTTPTSAASMAVEESIQPEPKFLSVSKETLLAESQPLQSELAE AEGEHLEEPGSDAVRSEKLEAKQEREARRSEHMQMEREREAQQSKHVEVYQEQKVEPESLVKNVRALENPCDGRRVYMYDLPSTMNTDILKNCSGNLVKW LNFCPHHKNHGFGAVVNATVEVFRQDWYGTDAYMLEVIFYERMQTYSCRTSDPAEADLFFIPYFAGLDALPYLYTDSKRELQQGREVVEWLEENAPKTWR RHGGHDHFYIAGRTAWDFCRPLTKVNWWGTSLFNNPEMENTTAMVLERRPWRDDEVAIPYPVGFHPSTSATLHSWIEVVRSSPRKHLFSFSGALRPHLTI SIREILSRQC…
PpGT47_15	Pp3c3_22580V3.1		Chr3	15466205-15469893	MGPKQCVARESLLEKSDEDNLGKVTPRPRLWNRKCTAVGSMCGMVRSTVLERRLLVMVILMCCVGFIFLSTSRDNLKPEPWHSDK MWHYPVAFPRCSIDACFNFSRCEHSDEILVYTYNDPEPKQNPTYFELLPSSKWHTNDPQEACLFFYFSDSKANKAAWKKPDPRNLPHWNGGLNHVFVTFA DRWAQTNPPPGSIGMASILSTELHDTTYRPGFDIAIPLPRRNVNVITGLSELKPFERKYFLTFKGTRYLSREGKFRSGSEFRGMHDGKDVVVVTTCDHGT NNKLRLWQPWRGAGCAEDQTVFDSYDFMELLNTTFGLAPAGRSPASYRMLEVLSAGAIPVLVADNYVKPFETLIKWQRCLLQFPTSEIHRIVPTLRALSK KEVEMRQRYC…
PpGT47_16	Pp3c3_22700V3.1		Chr3	15535998-15537276	MCCVGFIFLSTSRDILEPKPWHSDKMWHYPVAFPRCSIDACFNFSRCEHSDEILVYTYNDPEPKQNPTYFELLPSSKWHTNDPQE ACLFFYFSDSKANKAAWRKPDPRNLPHWNGGLNHVFVTFADRWAQTNPPPGSIGMASILSTELHDTTYRPGFDIAIPLPRRNVNVITGLSELKPFERKYF LTFKGTRYLSREGKFRSGSEFRGMHDGKDVVVVTTCNHGTNNKLRFWQPWRGAGCAEDQTVFDSYDFMELMNTTFGLAPAGRSPASYRMLEVLSAGAIPV LVADNYVKPFETLIKWQRCLLQFPTSEIHRIVPTLRALSKKEVEMRQRYCQQIFQSVLKDDSTLMQSVMRSLRERFMGMLPNLPLTHDE*
PpGT47_17	Pp3c3_23480V3.1		Chr3	16013872-16020673	MVSSSPTLPPLQRRMGIIIPFIALVVISIIVTLLYGNIASQSCPQESIAPGLPFTAPYTLSVPPGNCNCTVFFPQGSHDPLHPSP PSLYCECLDHAETSSNVTLECPKTDKEIQFVDRKVIKEVAQDCPVCTNDARIIEKEVIKEIGKECPEPVPQIVAKEVVQECPKTPWYAKNRSWHYPASLP LCSMDSCFDYSRCDNADELLIYTYYKPGLEPQRYFLRINESKYHTDDPEKACLFLVPFDNIDPWHFQKVEELPYWNGGMNHIVLTFSDKYRRLAPTDEKI GNASIMASDMQETMLRPGFDISIPLPGNYHMRQLQPISPLQRKYLLTFRGKRYIGLTDDGIFRSSKEFREMHNGNDVIVATNCDHATNDYHRREHPELGE GCDEDKEVWK…
PpGT47_18	Pp3c3_35380V3.1		Chr3	23734350-23738906	MSSFPNSEWSAQYDEEAAIDAPIQEHVMQSFSTSSSVGFSYNEQGMLNRGRKGFRGMQQEKNEYRQSFYHLQHRYTKMITLPVVV IAISVIGLFFALISFRGFFHPTMKAAGAQSGHRGRIFKDLAVAAVDRNSLGDKNQAQRFLDLEYHTNQTRVGRTGRIFRRRVLDSLQGMLWGTSHPPRNS QLRKAYLRTIRDTRGKEENLYSSEDMLHAEVYHNFTYFKERYAEMNKTFKIYVYRDGFKPLVHGAKTGGIYATEGLFLKRMEDSNNRFTVSEPSKAHMFL LPYSVRQMVDILQDPYSRSMRPLKTFISNYVDTLASKYPYWNRTHGADHFFVSCHDWAPLSTMLHGELHTNSMKVVCNADLTVNFDIEKDVSIPQTLKGG NQSDLDVGSL…
PpGT47_19	Pp3c4_7630V3.1		Chr4	5406569-5409639	MKRIMCRLELVLFLCFFAIFVCFTSFNSAKFLKHYNSIVYVSDGTGTKLLKSTLANCNCTVCAACPPAETVVVEKVIVKEVVKKEE CGNNEGPWYAEGKTWHYPARFPLCSMDVCFNYTKCDSSEDPLIFTYDLPAPPKRYFSRIGEFKYYTNDPAKACLFLVFLDGDTPWPPHPSTLPYWNKGLN HVLVIFADKWHQRGPHQASIGNASVMASDMHETTYRPGFDVSIPLPGRHHVRRFQSVKPLERKYLATFRGLRYLGPKGEGVFRSLDSFRGMHNGNDVIVA TSCEHMINNMIRKKEPTLGVHCDEDLLIHKNYTFDDLMNTTFGLVPAGVQPASYRFIEVLSAGAIPVLIADNYVKPFDTLILWYKCLLQFPTTEMHRIVG TLRAMKPEE…
PpGT47_20	Pp3c4_16670V3.1		Chr4	11509524-11511662	MKRVVCRLELILFLCFVVIFVSLTSFNSAKFLKHYNSIVSVSRDPGTKLLESTPANCNCTDRAVCPPAETVVVEKEIIKEVVKKE ECRNNGGPWYAEGKTWHYPARFPLCSMDVCFNYTKCDSSENLLIFTYNLPSPPKRYFSRINESKYYTNDPAKACLFLVFLDGDTPWPPHPSTLPYWNGGQ NHVLVIFADKWHQKGPHQASIGNASVMASDTHETTYRPGFDVSVPLPGRLHVREFQSLKPLERKYLATFRGLRYLGLKGEGVFRSLDAFRGMHNGNDVIV ATSCEHAISKMIREKEPALGVHCDEDLLIHKNFTFHDLMNTTFGLVPAGVQPASYRFIEVLSAGAIPVLIADNYVKPFDTLILWYKCLLQFPTTEMHRIV GTLRAMKPEE…
PpGT47_21	Pp3c4_17130V3.1		Chr4	11805691-11809694	MHRVSVVLKSNGHREIPSYSSFTSFSKNKHEAPVASHSYWEKPRYLVLGICILFSVFALCFFILPASMEFTVGNSEPGHQGLLRK NLRGLQTEETTNALSEEIGEESKNKEWRLKPDHFTLFNTSSLLTTPFNPLNLTNGIRIYVYDLPAKFNEDWLADERCSNHLFAAEVAIHKVLMTSPIRTL DPCEADFFFIPVYVSCKFTPKTGFPWLGQARKFMEAAVNHVSTRMEFWNRSGGRDHIFVASHDYGACFHTLETEAIAHGIPEFMRKSLILQTFGVQDFHP CQAAEHIQIPPYVSPSVAASYIKDPPERQKRNIFAFFRGKMEINPKNVSGLVYSRGVRTVLYKKFSHNRRFLLKRHRTDNYQLEMLRSTFCLCPVGWAPW SPRIVEAVVH…
PpGT47_22	Pp3c4_25210V3.1		Chr4	16912272-16915628	MDFSKTAKKHRAQSVSKRRSISKVSIVVFIILFTTWFCPSPDSIFQQEETSIQSVQDVGHSSDACYGRRVHMYDMPEVFNTKILE FCDGKLVHWIHFCNHYKNYGFGEIVNTTNSMFRDDWYGTDAYMLEVIIFERMRSYPCLADKPANADIFYIPFFAGLDALPYLYNDTRKMDKQGHEVISWL RANAAESWARYGGQDHFMIAGRTAFDFGIPTMDDWGTCLLDLEEMQNVTFMVLERRPWRSLEQAIPYPVGFHPSNAASLNSWIERVRKSARTHLFSFTGA LRPTLSIRRMLSNECENAATECSRLDCAKVSCSHNPVPIYESLLRANFCLQPRGDTATRRSTIDSIVSGCIPVLFHEDSAQKQYMWHFPEDYRTFSVFIH EDCVTNGTCI…
PpGT47_23	Pp3c4_26380V3.1		Chr4	17859267-17865694	MGIHWWSWQVVVPGLSLVVLVVATHLFVTPLVPTFSVDPNALVIHRINGTYEWNAERDRSCEKEHGAVVYRNATWKADVGCWLSQ CGNSSFPIPVVEKFWRNSCTFECDGRGVCNKELAQCRCSVGFSGVGCEKVINRKCNKGVTDEQPYGSWGVSVCPGFCDKRTAHCLCGNTTKYPDRPLAEA CGFHSKGNTGEIDWTKADTDYIYGNKSYQGWCNLDAEDVHDKNIRVKLPQCDCKYDGQWGVVCESPSESFCINQCNLNGICHQGFCACRKGWYGVDCSVP SYLPPPVQRPKWLPQEAAPDVSDETNRISVASNIMKKRPLVYVYDLPAEFTTQFLQGRHFKFECVNRLYDVDNATIWTENLYGAGIALYESLLASEHRTT NGDEADFFYV…
PpGT47_24	Pp3c4_27470V3.1		Chr4	18848018-18849561	MKKVVCRLELILFLCFIVIVVCFTSFYSATYLKHYNSIVDVFDDSGMKFLASTPANCTVCAVCPPAETVVVEKEIVKEVFKKAEC GNKVEPWYAEGKMWHYPARFPLCSMDVCFNYSKCDGSEDLLIFTYNLPAPPKRYFSRINESKYYTNDPAKACLFLVFLDGDNPWPPHPSTLPYWNGGLNH VLVIFADKWHQKGPHQASIGNASVMASDIHETTYRPGFDVSIPLPGNHHLREFQSVKPLERKYLATFRGLRYLGLKGEGVFRSLESFRGMHNGNDVIVAT SCEHPISKMIRKKEPALGVHCDEDLLIHKNYTFNDLMNTTFGLVPAGVQPASYRFIEVLSAGAIPVLIADNYVKPFDTLILWYKCLLQFPTTEMHRIVGT LRAMKPEEIK…
PpGT47_25	Pp3c5_12240V3.1		Chr5	8646252-8650497	MGDKNAPQGLAHKVFSARHRAKLLLPFCLLVVGIVWSSSSLIPFSSMPGSRVYLRQCATCAPEAVLSGDNLEEVGGSTTLQL KESLNVQDGRHPQADTRSQLAAGKNSKAGDARSGKNAALAGKKPRKTLVPDLALSATVETEDSPLGRKSFSKEDDEEDTQPDKPVEMEEMDILRTELSAA LMQSEKRAHGGDTRITGDLYANGDRYALRILDEIRSNSAPPSENSSSTDGGSCKGRYIYVYDLPSEFNVDLVKRCDSLLPWFGLCEYFQNSGFGRVVAPE GGKNDSSQILQPAKRWFNTHQYSLELVSHARILKYRCRTDDQSKASLFYIPYYGGLDVIRWHWALNATNEKRDALGRKLVRWLENQPSWNRRGGLDHVLV LGKISWDFRRQIT…
PpGT47_26	Pp3c5_15410V3.1		Chr5	10806425-10810642	MNSSQRINPIYEQLHWGDKVVKRGLLCKESPNQENSGGVSQKGSGSPTFLSLPLNSHDVQKARPCRGSDECRTSRRYILAVCLLL SITAFAGSLMFAKSVSPTLLLNDGCTTSYNSFSKLQRRFSLQDSQTASAELGTGFPEGCSEKATTLRVFMYDLPSEFHYGMLVQQPYSQGQIWPRNVSDI PPYLGGLYKQHSVEYWLTSDLLTSNMADRQSVCTAFRVDNWRSADVIFVPFFASLSYNKFTRAEQRALGEDKNQELQEKLMQFLEKQPAWQASGGVDHVI VIHHPNSGYFMRDHLRKAMFVVADFGRYASDVANIGKDIVAPYKHVVNDFEAEATISYEKRKTLLFFQGAIMRKEGGIIRLQLYKLLNGEPDVHFEGGNT TNSAIRSASE…
PpGT47_27	Pp3c6_140V3.1		Chr6	73804-78084	MARPRRCLGERAHPTFLTSVVIAVSAIVLLQHICTTKGPAYSLLHSSLISRQAEPVLSKLDALTPTKGRHQKNLTPSSPEMISETEN VSTQAQSLSSNKRQDFSENFLHAGNESQMFTAVESEVSETGKEFNNNGTDLLVPETSNRQVSSEILNNGTMVESVVAEAATERQVVAVETEAVQIVKGVI NSINSSENMAEVADRMDLDHNRSELTVPNAESDSKGAIPVGGDEAVDVMQPRRFESLGDANVGRIPVETETSHEENKQQLMIASWPPQASPVPKTCKKAI EGATLETADPSLDSSLYKNVTAFSKSYELMEKVFKVYIYKDGRKPLVHSGPQLGIYASEGQFIERMEAASEFLTDDPSRAHMFFLPYSVYRMVTHLYVPN SRSMLPLA…
PpGT47_28	Pp3c6_14300V3.1		Chr6	9230197-9232311	MREKNAPQGHGHKVLPARHRTKLLLPFCLLVVGIVWSSSSLAPFSSVAEFHIFRHQVKPAHQKREIPEDNLDAVGASETIHLKEA LSLRDGRDTRVHTRSQLTAGKRTKTSGEATSTNEGQAGMTPKKILVKDSAVSTTAKDEDSPVTSDPHFQEKEEDSYPDKPVEMEEMDILRTKLSLALMQK ENSLHGGDCRITGDLIRRGNRFVFHILDEIRGKYIYVYDLPPEFNVDLVKRCDSLLPWFGLCEYFENSGLGKPVASDQRKNRSSQILQPIERWFNTHHKA PLFYVPYYGGVDVIRWHWALNATNEKQDALGRQLMQKVTKLLIERNPWHRNDIDMPHPTFFHPKSTSDIRRWLAQVESHSGTNLPSFVGKDLHLDPNNVR DTLIRQCHNA…
PpGT47_29	Pp3c6_15330V3.1		Chr6	9922636-9927043	MMVKSSRKPACWVLFGLFIAFILALPAYISPDSMIQNGHMNDKTFNWFRWSPRSKLDDSTGSYSCPLKIYMYELPRKFNMGMLKK DKNQEIPWTNHVAPPWKQKFEVNKQHSVEYWLMVYLLDGWDRKDGKTAAVRVIDPEQADVFFVPFFSALSFNSHGHGMSEGAAADKRLQAGLVDILSKSK WWQASQGRDHILVAHHPNALRHYRDMLNQSIFIVADFGRYDKTVARLSKDVVAPYVHVLPSYDQDNPADPFSLRKTLLFFQGRIHRKGDGIVRTKLAELL ANNSDVHYVDSLASAEAIATSTAGMRTSRFCLHPAGDTPSSCRLFDAIVSHCVPVIISDRIELPFEDDLNYKDFSIFFSSEESVKPGHLLRTLRSITRER WLRMWNALKT…
PpGT47_30	Pp3c6_24480V3.1		Chr6	16077076-16079247	MRSREEGERSRVVARMIADSSFSQCWFKYGLMHKCHWRWMWLIVALLVLAFYYFGVSSSMLLSGVEKDVLAVNLKDGGHSRRTAY SRSREVMEQVYHSTDIFQRSFKEMEEKFKVYVYPDGDPETYYQTPRKLTGKYSSEGYFFQNLRESRFVTNDSAAADLFFLPVSCHKMRGKGLSYEKMADI VRAYVESLIIKYPFWNRTVGADHFFVTCHDVGVRATAKVEHLVKNSIRVVCSPSYNGSFIPHKDVALPQVLQPFPLPAGGDDIHNRTVLGFWAGHRNSKV RVNLADAWQYDPILFVANNRLNRSTGDYIYQNQFYRSKFCICPAGSQVNSARIAESIHYGCVPEVIMADFYDLPFNDILDWRKFSLVVREREYDNLKKIL QAVTVQKYRM…
PpGT47_31	Pp3c11_1480V3.1		Chr11	709074-711571	MWKLSKGSGNRTVPGFKDFTVRKGHVILGFAFCVICVIAGLSCSYRLSNSEPTEVRRLSTGSLLPHLRILTSQAYSDDEVPTTER ASESMDSRTVVESLEDVKLGDENDGVPQGCDSNAELKVYMYDLPPEFHYGMISAFEPKIGKIWPANASQIPPYPGGLYQQHSPEYWLTSDLLTSNMQNRE APCTAFRVERWEDADFVFVPFFASLSYNRYGKVTDQMLVEEGSNMKHSLYKDKNEELQAKLVQYLEKHPAWKASNGKNHVMVIHHPNSMQAVRDRLRNAL YVVSDFGRYENETANIRKDVVAPYKHVLPTFTDDSSSFHTRSTVVYFQGSIVRKEGGKIRHELYDLLKDEPDVHFTTGITASEGFHSATRGMRSSRFCLN LAGDTPSSNR…
PpGT47_32	Pp3c12_16390V3.1		Chr12	10937855-10942459	MGDTSGYFSMPYTAEYEAEVAISVDDFMRPSNVGLSYSKQSVLNRGRKGGRSANLPNKGHDQQSFYHLQHRYTKMFSWPIIAIM IGILFVLVMFRGFALPRMATGTKASDQNFEELDGLSSTESRLDEKFNARIPRVIIKKNHERTENIGMVFRQKVFDTLQGFLLQVSRHSHLRDDGSGDAKG KSEDTVSSVHKQHEVYHNFHHFIKTYAEMQKTFKVYVYKDGYKPLVHAAKTGGIYATEGLFLKRMDDPGNRYTVSDPTQAHMFLLPYSVRQLVDFIQDPY SRSMRPLKTFIANYVERITSKYPYWNRTRGADHFFVSCHDWAPLSTILHDELHNNSMKVVCNADLTANFDIQKDVSIPQAVKGGNQSELDIDNLPPGKRD YLAFYAGQMHG…
PpGT47_33	Pp3c13_10590V3.1		Chr13	7526478-7528996	MDTRSRKFRLMNPFKHYEVSGGRDGSSKSGSSWPMSAKFTPKIHKMSPPPKKKLAIKCCVLFLIVLFTRWACPSSGVPLSLHQL MLQSESCQGRRVHMYDIPPSFNTALLQFCEGGLVHWIKFCKHYQNHGFGERVMASASMFRDDWYRTDAYMLEVIFFERMKSYQCLTDSPVNADIFYVPFF AGLDALPYLYNESMRLQQQGLELLDWLRQNATESWRRYGGQDHFMIAGRTAWDFAHPEEGGKDWGTSLFDLDAMKHVTFMVLERRPWRPNEQAIPYPVGF HPSSSASLELWIHRVRDTKRTALFSFSGALRPGQVGSIRDQLSQQCANASTKCSRLDCATIKCSHNPEPIYDSLLQADFCLQPRGDTATRRSTIDSIVSG CIPVLFHKDTA…
PpGT47_34	Pp3c13_10710V3.1		Chr13	7707297-7710185	MDVPKMSAKKHRAQSSKRRLILKCFIAIIVVLFMTYISPGPGKFQTESQLQNPQKLMEAHSLPQVAQSLPQEAHSLPQETHSLP HVSYSIPVETHSLPVETHSLPVDTHSLPVDTHSFPVDTHSLPVDTHSLPVDTHSFPVDTHSLPNVPQLRDVCDGRRVHMYDMPKEFNTKLLELCDGELVD WIHFCKHCKNFGFGEKVNTTNEIFQKDWYGTDAYMLEVIFFKRMRHYPCLTTSPDNADIFFIPYFAGLDALPYLYNSTKRFDKQGYEVLAWLRSKAAKSW ARYGGVDHFMIAGRTGWDFGTPSADGWGTWLFGLPGFENITFMELERRPWRSQEQAIPYPVGYHPSSAASLERWIERVRSSVRTALFSFSGALRPNLSIR GMLSNECVNAT…
PpGT47_35	Pp3c13_15720V3.1		Chr13	11389362-11392916	MCRPMPSAPSTPESIASMAVGESLQLNTQSIPAVEVAQETKTEADQSKLLENEMKEQVQGDSEATRSERREVEQEEGALRSGQE DEEQDQHAEDKHEQRAENRHAQQAEDELEQHLEDVHGRHAEVKNKQRVEDEHEKQVEDEHEKQVEDEHEKQVEDEHEKQMEDEHEKQMEDEHEKQVDDEH EQRVEDGQGQQAEDELEQHLEDVQDQHAEVKHQQRVDDEHEQQVKLDSRSAEHKQAGFPEEHQEGSKPKIKYSKELGAEHGHGIFQSKQSEQEQKVEPEP QLKKHGREVTISCDGRRVYTYDLPPSMNIDILKNCSGKLVPWLNFCAHHQNYGFGIAVNTTNNNFRKDWYGTDAYMLEVIFYERMRTYTCRTSNPGEADL FFIPFFSGLEA…
PpGT47_36	Pp3c14_11970V3.1		Chr14	7588040-7592227	MVCSSISIVIVRLKCTIPGVLVLDVMDRKMGDKYTTRSGIAKGPLSTARLKILVPFCLMVFVAWNSSSMVPFGRSSSGPTYGMP VPEYESLGVNTMQRHKKSSGALDGLVDVGLARFHPRTDVVTNQFDISMTFKPTSQVHDEPNSVHPSINNGAQFKIEITSDEEDKVVIAQSKYDEGGREHD STQSKDCRKEDSGAIAQHGADGNAQTTAESNQPDRNEGSSVAPDTITGNLSSPVNIAAMEIFDEIRSRSLPYATTISERSEDSCQGKYVYVYDLPPEFNV HLTERCDSMIPWFNLCDFFADSGIGKPVNSMDNGTQIFLPADRWFSTHQYALELVSHARIMKYKCRTEDPNLANLFYIPYYGGLDVIRWHFDLNATNTNR DALGWKLVRWL…
PpGT47_37	Pp3c14_16130V3.1		Chr14	10232322-10236045	MQKATMWNGKPRNSSGAGFCRPLEFVVATVLVIITYSCTRFALEVPKQACRCDLSSRDVLSKESSGCGEDHREVNFFWGGFRWP ERGYGSRLNLQIYIYDVDEIDGLRELLSGRDHSIASSACVRGQWGTQVKIHKLLMKSRYRTLDKSRANFFFVPVYVKCVRIFGGLNEKEVNEHFLKILRQ MPYFHRSGGRDHIFVFPSGAGAHLVKGWPNFLNRSIFLTPEGDRTDKKAFSSFNTWKDIIIPGNVDIINHPSNSATSPLPLSKRKYVANYLGRAQGKKGR LQLIELAKQFPAELDAPELAFQGSAKLGRIEYYNRLRNAKFCLAPRGESSWTLRFYEAFFVECVPVILSDEIELPYQNVLDYSGFSIKWPSSRTNEELLR YLRSIPEFEIE…
PpGT47_38	Pp3c14_17240V3.1		Chr14	11269743-11274466	MATVGEQTFRTEKMMKRGLLPSNVLEHQNCGPNCISFPACSVEAKSTCQPRFRLLRGYEEWAARNHILAIFSLLAIFALSCTFM FADSMRRSTEIIEEIDTHSLPKLSLPDQNSWATENSLKRSGLLSEEVGGSDSDGVAHPVGGDGKVPFGCNDKSATLKLFMYDLPPEFHYGMLVAQTDSRK QTWPKNVTDIPPYLGGLYKQHSPEYWLTTDLLTSNMAGRQSACTAFRVSDWKAADYMFVPFFASVAYNKYTKTEHHAGGELDLVGDKNQKLQEKLLEYLK QQPAWQASDGCDHILVMHHPNSMHAMRDSFRNVLFVLADFGRYPPDVANVEKDVVAPYKHIIPSFDNDSSSFEDRETLLFFQGTIVRKQGGVIRQQLYEM LKDEEGVHFEE…
PpGT47_39	Pp3c14_19620V3.1		Chr14	12930881-12934024	MSRKVSRLWAVLLFLVMAWSTWNATDYFPRNLHPTVNTPEISFLASLHGFLMKHAEISWKVSVDSPGIAVHGEGIDRSPGSIPT SPPTLNIYVYEMPAKFTTDLLWLFHNSLDQTVNLTSNGSPVHRLIQQHSVDFWLFSDLMTREDKRLLKTFRRVSHQEQADVYYVPFFTTIPFFLLSRVQS RTLYREAVKWITRQAAWQRSGGRDHVLAVHHPWSMKSHRRFLKSAIWLLSDLDSSGNWYKEGEVSLEKDVIMPYVANVDACDDNCLATSKPSRKTLLFFQ GRIVRGSAGKVRSRLAAVLRDEKERIVFQEGFSGAEGKATAQHGMRSSVFCLSPAGDTPSSARLFDAIVSGCIPVVVSDELELPFEGILDYRQVALFVPA ARAAQKGWLVA…
PpGT47_40	Pp3c14_23920V3.1		Chr14	15274801-15277514	MSTIKEAPEPKISTYLQILYGLFNFLLLGLMIVSVVNMGTYVISGGGPTSNATSPPVYLHPARFDTSMRKVEENRNPTESSHCS MGSCFDYSRCDGMEELLVYHYDSPSSQAWYFKQALEKSPYYTVDPSKACLFFVTVDTRAEHALDFNTLPYWNHGLNHVIISVSDNWAKQKTLIPDVAEMA STMTSSTHRTTYREGFDISVPLPQRKFYLELQRRKALERKYFLTFTGTRFLGRSGLRNNAVLRSMHNGENIIVATTCNQGLNSEAMLKHPELRSDCARDQ SIYDKYKFEDLMDSTFGLVSAGRGSSSFRLLEVLSAGSIPVVISDNFVLPFDTLIDWSRCLYVFPSSQMHRIVRTLRSLREEDIEFRWSYCLFIYREFLA DDDKIVKTVAM…
PpGT47_41	Pp3c16_11220V3.1		Chr16	7157137-7162169	MWRSVQAVRAGKYVDSKEDDDDLAAKTKHFRSDDSVWIRKGFVVASVALFCLFLLTGFLSRTRLTSEPSNVFKYVEAFNSEVLE SGSESEPEEPGSDSWELNDHLEASKQVGCHKDSAKLKVFLYDLPPKFHYGMIPEFTPEESQIWPRNVSNIPRYPGGLYQQHSPEYWLISDLVTSDMPERS TPCTAFRVKNWQIADVILIPFFASLSYNKYSRPAVRGRKKMDRNQELQVNLLSFLRSQPAWRASNGADHVLIIHHPNAMVYKREQFRSAMFVVADFGRYD AEVANIAKDVVAPYKHIIPNFDDDIDSVSSFNTRTTLLFFQGAIVRKEGGIIRQKLYELLRDESDVVFVNGTTTSAGIRSATSGMRQSKFCLHMEGDTPS SNRLFDAVASH…
PpGT47_42	Pp3c16_12540V3.1		Chr16	8055067-8059671	MIVKVSNKPFFWALIALSIGIIIALPMLISPHSTMYYLNRISNTGDANGTALSWFSWSSLSQTYDSTTNCYSPLKVYMYELPRK YNLGLLQRDNPDQELPWTSDVIPPWKMEFEVNNQHSVEYWLMVYLLSGRDRKKGNMAAVRVKDPEQAEVFFVPFFASLSFNSFGRNMAAPNAAKDRELQE GVVEMLSNSKWWQKSQGRDHIIVIHHPNAFRYYRDMMNQSMFIVADFGRYNQTVARLKKDIVAPYAHVVPSYNEDNPSDPFSARKTLLFFQGRVRRKADG VIRAKLGKLLMNQTDVYYEDSLARTEAIAMSTQGMRFSRFCLHPAGDTPSSCRLFDAIVSHCVPVIVSDRIELPFEDDLDYSEFSIFFSAKEAIIPGHLL GTLRSITRERW…
PpGT47_43	Pp3c16_19330V3.1		Chr16	11814886-11818487	MKKVRFLKEKSRKDTIVFLEMRNRFVLAISLLAFLTLVRYCRFANSLRGIAPPIHESLQVDSPLLSRAAKAQNLVHDRYGSVIR QAGTDTIILDEHEANFGGSLDGVRGKHKDGRGGIEALCKNRYVHVLDVPKEFNEQLLQECHTLKDWSDMCVALSNAGLGPAMVDEDAFTSSGWYETNQFA LEVIFHNRMRQYDCLTVDPSMASAIYVPFYPGLEASRTLWSSDIKARDTIPLKFVEWLQKQPEWAAHGGIDHFMVGGRITWDFRRQGNSWGNKLLTLPPM QNMTTLVIEASTWNTNDMGIPYPTYFHPSCDSEIRAWQQKVRSFQRNVLFSFAGGKRDNMARLIRGQVIDQCGRSPLCKLLSCDRGACQSPQPVMKLFKE SQFCLQPQGDS…
PpGT47_44	Pp3c17_6760V3.1		Chr17	5147892-5152940	MGDKYAVRVAPSKITLGAAKFKFLVPFYLLLLFVVWNSSSKAPFDGVNIGPVHDITKSKNEAMGAHTILQLKERINAQDGEVDKD TAQSGHDTDLIAEQYDNLMTATPTLERNEDLYGAQSGIDRGEAGEVTPVMERPKDDENEEEQVFARSGYVGNEELVESTRDGADGYDQTTAESDESDRQG NSSPALDSTEGDDQNATVQEVKASIITGDRMTEVNIAAMDIFNEIRANSLPYSIKKTGETAQSCEGKYVFVYDLPSEFNTELINRCDSLFPWFNLCDYFS DSGIGKPVNSMDNGTQIFVPADRWFSTHQYALELISHARIMKYKCRTEDPDLASLFYIPYYGGLDVIRWHFDPNATNENRDALGWKLVRWLENKPSWTRR GGIDHVLVLG…
PpGT47_45	Pp3c17_22930V3.1		Chr17	15010396-15014307	MSTLKEAPTPKISPYLQFLYGLFNFIILGLMIVSFVSVGNYAKSSEVQATNATKSPVFLHPKPLKTITRDVDSLDPVYSSVGDR ISNKFSSCSMDSCFDYSRCDNAEELLIYLYDTLDSQTWYFKDALERSPYYTADPEKACLYFVTVDRRAEKIPSLPTLPYWNHGLNHVIVSISDFWVQRKA TPVETIEMASTMTSIAHHASYRAGFDISVALPQKRSYSDVQGLKAFERKYFLTFTGMQFLGSSGSRINPVLRSMHNGEDVIIAITCKQDPNSEALLSRPE LRAECVQDQSVYEQYTTRELMDSTFGLVQAGRGSSSSRLLEVLSAGSIPVVISDNFVLPFESLLDWRRCLLVFPSSQMQRIVRTLRSLSKGEIEFRREHC LYIYRDFLADD…
PpGT47_46	Pp3c18_14230V3.1	XDT	Chr18	10288289-10293328	MGYAPQWNTVATKGNHRASTKSRLAVGRRAYVAIGAVLVFLLYTWIGYDEMRLGPRTSSRFKQTLRSGGIAGQECEQSAEPSQE GIRSLGSYATNALESCESAGPDLPVGYNFEATKLTPEECEGRHVYMYDPPTEFTVDIIKNCQNWSTWWTMCEDAQNGGFGVRLRLRKSDPLSSITQPPDS WYRTEQFTLDMSWHSRMKTYPCLTDDPNEASIFYVPFYHSPDLTRNLKNPNMTETDYLTTRFVKWLGKQAPYQRYGGRRHFIVMGRIFWDHNRLFNSTHG WGSSLFSQPELKNVFKVMIERSEWAADTIAIPYPTNFHPTSEAALQAWEAKIRVAKRTKLISFAASDRSRNMTGMVRGELFDQCSKSKTCNHVICSTELC VFRPQTIYKIS…
PpGT47_47	Pp3c19_15740V3.1	XLT2	Chr19	10382050-10386135	MSQWHIRVPKGGLRHSKPKPSSARWVISGIFTLSIIFLYMTARNEWISAVENAMPISKVTEPSDKNSLRFSPVPTDIEGSQQVN SSSASTDAELLEKPVISAATSEVVSDIVDTTPKSDTLDKCDGRLIYIYNLAKEFNRLVVEQCSNWEAWPNMCEDISNQGFGVPLQVPASDPMASILQPPD AWFRTDQFTLEIVFHERLKVHPCLTKNSEEASLFYLPFYHGLDLAQNLYNSDLAVRDRLNELFVKWLRSQKPWQRHHGKRHVLVLGRIVWDFVRKIGKDA SWGSSLLTQPELTNVTKLLIERSLWEDSMLGIPYPTAFHPSSESDLRAWQHTVRTFDRRQLVSLAGSTRTKKLTGVIRDEVFDQCTNSISCRTIFCNIER CVERPQIILKM…
PpGT47_48	Pp3c22_13750V3.1		Chr22	9030721-9034203	MANSRVNISSCLQSLNCLRLLEELQVTMRSSPLKGGRRHFKPKVSIGRWTILALFTLSMVFLYLMVGDGWRAVGENSDTGSEVT LPGEQEGFGPISTWIQSNDQEGLSPTPAVSQSGDQEQFSPTPIVSQFGDQEGSFVVVPTPTASIENSSISQTDSSAAPSVEAISPTLRSSDKCDGRRVYI YELAAEFNELILRNCTGVEAWYSMCDDIINQGFGVPLQIPESDPMASILQPPSAWFRTDQFTIEITFHERLKIHPCRTTNTEEASLFYIPFYHGIDLIKN LYNTDFVARDRLTLLFIKWLRSQKPWQRYQGKRHVLVLGRIVWDFIRDYSKDKTWGSSLLTHPELTNVTKLLIERDIWKDDTLGVPYPTSFHPSSESDLR AWQRTVRTFKR…
PpGT47_49	Pp3c22_20140V3.1		Chr22	13410448-13414602	MAQNRMQLVGCCCGGRQLNQPGESRSVMYRCATLLTVQTTLVVVLFLIGGVLVLDSYKWRQISIPWFSGLSEGPNAVLQQGNAA HTLSGAVHTESVDGKPAQGSSANFTTPAIGVPRNREDADHLPTSSPAPVITRLDAPSQPTVPTHASPPRPEIQSPSAEADAGTASETVPRPSPLLPEFHN SSISGPIPEPYLETAAHPPLASPRTAKKPPVLSTALDKLEYGLLQARFAIRHAYLAADKNDTPVDGGQGYDPHGDVYKSHAAFRQSYREMERRFKVYVYS EGEEPLVHNGPCKEIYAVEGRFIQELQGDNPFVTHDPDNAHVYFLPFSVAMMVAYLYEKESGDMDPLRLFVGDYVDVLMHKYPFWNRSGGADHFMLSCHD WGPLITRENMN…
PpGT47_50	Pp3c22_20240V3.1		Chr22	13586665-13590878	MAQNRMQLVGCCCGGRQLNQPGESRSVMYRCATLLTVQTTLVVVLFLIGGVLVLDSYKWRQISIPWFSGLSEGPNAVLQQGNAA HTLSGAVHTESVDGKPAQGSSANFTTPAIGVPRNREDADHLPTSSPAPVITRLDAPSQPTVPTHASPPRPEIQSPSAEADAGTASETVPRPSPLLPEFHN SSISGPIPEPYLETAAHPPLASPRTAKKPPVLSTALDKLEYGLLQARFAIRHAYLAADKNDTPVDGGQGYDPHGDVYKSHAAFRQSYREMERRFKVYVYS EGEEPLVHNGPCKEIYAVEGRFIQELQGDNPFVTHDPDNAHVYFLPFSVAMMVAYLYEKESGDMDPLRLFVGDYVDVLMHKYPFWNRSGGADHFMLSCHD WGPLITRENMN…
PpGT47_51	Pp3c25_2840V3.1		Chr25	1897151-1899907	MMWRPVQAGRTGKNMDSREDDDDLAAKVKPLRIGYSSWISKGYIVAALALVLLTLLSGVLTTDLSHSSGVPVVLKYVRAFKSEML DLKSEVELKEPDSGSLQFSNPSNASKQAGCHKDSARLKVFMYDLPSEFHYGMISEFTPKKNQIWPQNVSDIPKYPGGLYQQHSPEYWLISDLVTSDMPDR STPCTVFRVKRWQDAGVILIPFFASLSYNKYSRAPLLRGKKLDRNQELQLNLISFLSSQPAWRASEGSNHVVVIHHPNAMLHTREKFRSVMFVVADFGRY GAEVANMAKDVVAPYKHVIPNFDEDVDAALSFKSRTTLLFFQGAIARKEGGIIRQQLYELLGEEPNIIFSNGTTSNAGIRSATAGMRQSKFCLHLAGDTP SSNRLFDAVA…
PpGT47_52	Pp3c25_4460V3.1		Chr25	2917757-2918574	MHRVSVVLKSNGHRETPSHSSFTYFLKSFQQSLLHLSSFHGVYGGKFGSIGTLDPYEADYFFILVYVSCKFSPKTGTPWLGR ARKLMEAAVNHVSTKMEFWNRSGGRDQIFAASQDNSVCFHTLETEAWNTRIYTKLFNPSNLGVQDFHPCQAAEHIQIPPYVSPSVAASYIKDPRNIFAFF SGKMEINPKNVSGLKAMRACFHGSAAPGFT*
PpGT47_53	Pp3c25_6620V3.1		Chr25	4432711-4435401	MLLGMKKARSFKEKFRKEAIMSLDIRNRFVLVTSMLAFLTLVRYCRFASTAEGVAPSIHASLQMDSPVLSRSVKAHNLVDGRQNY VIRQAKADTIVSNELEPNFGGPLSTTRTKDEDAGVGSRALCENGYVYILNVPREFNEQLLKECHKLKDWSDMCVALSNAGLGPAMVDEDAFIRTGWYETN QFALEVIFHNKMKQYDCLTSNSSTASAIYVPFYAGLEASRTLWNSDIKLRDVVPLKFVEWLQKQPEWLAHGGHDHFMVGGRITWDFRRKGNGWGNKLLNL SPMQNMTTLVIESSTWDTNDMGIPYPTYFHPSSYSEIETWREKVRSFQRNVLFSFAGGKRKDMPKLIRGQLIDQCRKSPFCKLLSCDKGACQSPQPVMKL FEESQFCLQP…
PpGT47_54	Pp3c26_3030V3.1		Chr26	1414085-1417326	MARSGLLEDGGNLFSELGRTRKRNGSNSKPGRGICLLLVTVFFTLLLASRLLWCFMYLFNSTATVMYVDHHTVHPNRDSAAFAGE NETKAMGEGTIVRELGRKANESEHDQILEDSEEKIVDDHVDEKEGSMVDTNVGNKRAEIEEVWKDEEQLGELMAKMTNMVVKLGDGKEEEEEDKEENDDS VEKVALDNGHAEKMKLPDAIAFLEQLAGKLTKTGVHEDYGPYHSRRIFESDYAEMKRKLRIFVYPHDRKDPFHMIFESGNKVPSGNYASEEFFQQSLLTS TFLTKTASEADFFFMPVSITKARMDKRINVGGLQSFCANYITDVRSQWSYWNRSNGADHFYLSCHSIARNAMDRVPDVRQNAIQLLCPASYFLPSYITHK DASVPQIWPR…
PpGT47_55	Pp3c26_8080V3.1		Chr26	4645292-4649206	MHRVSGVWRSNGHRGLPSCSSFTSFSKHHRHEAPSTLYSYWEKPRSLSLAICTFFSVFVLCLLALPFAVDMPLENPKSGYQALLR TSLRAMPLGETNNALHEEKEVRKSDKEWQLKPDHFTLFKVSSFDTTPFNPLNLTNAIRIYVYDLPPKFNEDWLVDERCSNHLFASEVAIHKILLTSPIRT LDPYEADFFFMPVYVSCKFSPKTGFPWLGHAPKLMQAAVNHVSTKMEFWNRSWGRDHIFVAAHDYGACFHTLETQAIAQGIPQFMRNSLILQTFGVKGFH PCQAAEHIQIPPYISPSVAVSYVKDPLEHQQRDIFAYFRGKMEINPKNVSGLLYSKGIRTVLYKRFSRNKRFVLKRHRVDNSQQEMLRSTFCLCPLGWAP WSPRIVEAVT…
PpGT47_56	Pp3c26_14140V3.1		Chr26	8830885..8833582	MTFLGVLSGPKMGYGLGIKENGEKAKYPAHRFRSRCIFILLTIVFWWALLMVHFSFHYRSSPVQSSIGDVMISVQTQDSMSKSL SRGLSTDSTYDSSAGDSSETEKMVQKKWLKDGDVHHVNERPDMEIMNDQVDVDDDTPLEIKSVESHFDEGDPTMEQPIPGCEGRYVYVYEMDPYFNEDMV EHCDKLNIWNNWCPSVSNEGLGPPMVNTDNVFSDSDWYETNQFMLERIFHNRLKRYKCLTKDSSRAAAVFVPFYAGFEISTKLWRANISERDAAPARLYS WLAEQPEWKRYNGRDHFMVGGRITWDFRRRTDDESDWGNKLFVLSAALNMTMLSIEASPWHQNDVGIPYPTYFHPSSKRSIETWQDRVRAMDRPSLFSFV GAPRPGLSHSI…
PpGT47_57	Pp3c26_14180V3.1		Chr26	8856784-8860414	MTFLGVLSGPKMGYGLGIKENGEKAKYPAHRFRSRCIFILLTIVFWWALLMVHFSFHYRSSPVQSSIGDVMISVQTQDSMSKSL SRGLSTDSTYDSSAGDSSETEKMVQKKWLKDGDVHHVNERPDMEIMNDQVDVDDDTPLEIKSVESHFDEGDPTMEQPIPGCEGRYVYVYEMDPYFNEDMV EHCDKLNIWNNWCPSVSNEGLGPPMVNTDNVFSDSDWYETNQFMLERIFHNRLKRYKCLTKDSSRAAAVFVPFYAGFEISTKLWRANISERDAAPARLYS WLAEQPEWKRYNGRDHFMVGGRITWDFRRRTDDESDWGNKLFVLSAALNMTMLSIEASPWHQNDVGIPYPTYFHPSSKRSIETWQDRVRAMDRPSLFSFV GAPRPGLSHSI…

## Sheet: Chlamydomonas reinhaedtii
CAZy Family _Gene ID1	Model	Chl	Chromosome position	Protein sequence
CrGT47_1	Cre02.g111150.t1.1	Chr2	5838878-5845319	MRALLLCFLSLAFLSLITGQQGEPLLRFFKEAKKSCAAGCEENGNCNAETGECQCRFGYGGADCSQPILSGCLSARKKGAVP QYGLQFPKNCECYRQLLNISCYGSDFAKDPFWCNQPAIWEWHTIKCYEYMDVPPEQQLSDPPEAGSTKVVWRQGVRNDSAHRDGGFLFQPYTKTDGLRTQ NLETLLPMDKCKDRCNERGRCVDAGGGLPQCVCAPFFTGPSCQLDDPSHCPLNCSGRGRCDGGFCHCQAGWWGAACTRSKAYTAEEWTPHPSELKIYVYD LPQHVAYMRPLGDHWPLHHSIYLAEIELYHRLLGDTTVVTENPWEANLFYVPTHTYYYIGNIGFPGKLYTAVFHHVRQQYPWWNLTAGRNHVVSNSNDRG CCDLYRMGPDVQH…
CrGT47_2	Cre02.g116600.t1.2	Chr2	6511045-6516819	MREKRFCATAAALLLGLALLPLLQPAIGQKACPEGCSKFGTCNLELGRCDCPWNYTGDACQTHNPAGFCVKRLGVDNPINTC KDGDPTLCVNACNGRGDCKGGFCHCKEGYFGTDCALSYNDQGKIEVLAGLNYRLNKRGPNIYIYEVPPEYHVKRDIHKVDRPPLQLAFMERILSGGHRTH NPEEADFFYIPGSSRDLKKAFLLQPLLAYISTTWPFWNATGGARHIMPAEGDVGTCELPLKVRLFTANVTWLQFWGMYDFHPHWTQIFHNRIPCMVPGRD IVVPFMAMSSHDRFVIETPLHPRNQKRNRTNTFFFAGGVCGSGNKRALPPHCTYYKQVRYSGGVRQAVYLHFHNRTGWRVVPGTDDYARDYASSRFCLAA AGGGWGKRGIVAA…
CrGT47_3	Cre02.g144100.t1.2	Chr2	7477421-7484852	MGTSRNARGSLGFRGGVACFLIVASCLASLSAVQGAAQSPFKEEIKTCHPDCTKFGNCNGETGQCDCPFGLTGPSCQERLFP ACHSSKDEGTVPHYGTWYPKNCECIKQLRDWPGSCPDYLHYEGNSAAFLSPCFYDSVTHHNLLCFSYKGRDPAEQLSDSPPLDDPNVEWFHITGYPRVLM TPVPPAQWPKEYKTPDGGQWRPLSECPDRCNNRGWCQIQGSNYQGFHEDPKERWCNCHGYYEGKSCEIADPGHCYRNCSGVGECVGGWCHCKPGYWGHGC TRTKAYSSSVGWRPNHAEIKVYVYDLPNNVVHRREFNDQWALIDLMYNSELEFTDKLLGDWGVRTENPWEAALFYVPTFTYWFTGNVGHPYYVIQHATKW LQENSPFFNLTGG…
CrGT47_4	Cre02.g144050.t1.2	Chr2	7485261-7493527	MFGVLLLCGVLCSSAISPFKEHLKACHPDCTKFGNCNGETGQCDCPFGLTGPSCQERLFPACHVSKDPGTLPHYGTWYPKNC ECIKQLHAWPGSCPEHLHYEGTGVSGASPCFYDLVLAHRFLCYRYQGRAPADQLSDSPALNASGVDWFHATGHTARHSPPQEAQLPPEQVPQEYKTPDGG QWRPLSECPDRCNNRGWCQIQGSNYQGRHYDAAERWCNCQGYFRGNSCEVADTQHCYRGCSGVGDGVGECVGGWCHCKPGYWGHGCTRTKAYSSSVGWRP NHAKIKVYVYDLPSNVVHRREFHDQWSLIDLMYNAELEFTELLLGDWGVRTENPWEAALFYVPTFTYWYTGNVGHPYFVIQHATKWLQENSPFFNLTGGR NHIFWATNDRGVC…
CrGT47_5	Cre03.g157000.t1.1	Chr3	2112556-2119747	MAYATTLVCYALIIVTLIALIQESWAGVDPAKQRCAFTRGTWCTNYAQQELVPWRPAPRGSKECEGGCNNVGRCNYDTGLCD CPAGWTGAGCKTPQKRPCTHMQRKGDAGENATEPYSHIGPDGRDLDWTNVPFPQYYSRCGGICDDEVAICYCDGPMGRIPAPPGSPPGTPPLQVGRPLMT MAHAPKTTWDGRKAFGEVDYKLVYGPKGYCNVTDPEWVPNCGMDGLAGRTCDSPMEMFCPGSCAGHGRCYLGFCVCDEGYYGHDCARRKAGMPLLPSRIP TTPWLAEVVREPPSALEPPPAPTRRRPLIYVYDLEPMYQSKILQYRVTPRWCVHRWHVWPANHTEWTDLWVYAMDTLLHESLLGSPHRTFDPEEADFFYV PHQASCLPFPIGA…
CrGT47_6	Cre03.g204100.t1.1	Chr3	7649880-7657402	MALARALLLLALAVLVPLGVVTGNLHAGDAGDGDNHTHILSKERKFALTESAPIQLRCSSAKGSWCEGFISQTPVTWKTAPR GSTECEGGCNNVGRCNYDTGYCDCAAGWTGPGCKTRQKRPCTNKQSHPNDGDFIRTEPLSHTLPDGRDKDWTVMDTVYSRCGGICDEDLAICYCDGQGPD QFGRIPAPEGSPPGTPPIRWGRPLVTFHMAPKTTWDGKRAFGEHDYNLVYGPKGYCNVSEPDWGPNCGMDMFLGPRCDIPIEPFCPGACSGHGTCYLGYC NCEEGYYGHDCARRKAGMPLLPSRIPTTPWLASVVREPPAALEPPPSATRRRPLIYVYDLEPLYQARILQYRVSPPWCVFRRHDLPANRTEWSDMWVYAA DTLLHELLLVSPH…
CrGT47_7	Cre03.g204050.t1.1	Chr3	7657450-7665300	MAKLSPFARARWRLRQWCLLLQVTQLVIAVQPGGVGQLGGQQQERPWQLGEDTPVQTRCAKTKGTWCTDFFGQAPVTWKTAP RGSTECEGGCNNVGRCNYDTGYCDCAAGWTGPGCKTRQKRPCTNHFRTPEDPSTEPRSHIGPDKRDLNWTEPGVTPSRCYGVCDDDLGLCYCDGPLGRIP APDDAPPGTPPRRRGRPLMNQFEQPTTTYDGKPTWGGGTPYEKVYGPEGYCNVTHSPWKPNCGGPEDLGGDYCDQPNEAFCPGGCSGHGACNLGFCICDE GYYGHDCARRKAGMPLLPSRIPTTPWLSREVHEPRAALEPPPSATRRRPLIYVYDMEPLYNAKMLQYRLASAWCTHRFYTSGNGTAYSPWCYGVESGLHE YLLLSEHRTFDPE…
CrGT47_8	Cre03.g205250.t1.1	Chr3	7532484-7541239	MCPWGYEGPACEVDRMAACRVSTEDPGSCSNLYTRNCECYRACARLYCHDPNKADRCTHELGADMTRNRCWLRSDWQGGSTG PAGSELPEDWSRGGTTWYKHFAPQETRASYDSDPGLLEDKALWGSSNWRGNHSVLPPAACPGRCSGRGVCFRWEHEQYPRCICAKGYNGTECAGVDSSEA CWFSPDCGGRGACKGGFCHCRPGFWGAGCHRGQGYLVQRSAPPASATQPPVWPDLRSPTKLKIYMYDLPWDVAFPGAYNDGFFGRDPMYSAYELFMRYFL QDNVTRTENPWEANLFYVPMLLYFYIGNVRDAVPQTAWAINHVRSRWPFWDRSGGRDHFYFMTGDRGTCHLPRELQDQAIKVVHWGMQVAGTDWIGLDNK DYACIQLKRDLVV…
CrGT47_9	Cre03.g202550.t1.1	Chr3	7874467-7881889	MSRSGPAALAWWYLLGWLCSSSTGAGVHAVLETSFAGRVQEQVVPTRKGCPRPCINKGHCNHEKGRCECPWGYAGDACEVDR MAACRQTPDDPGSCGFISPKNCECFRECFRLYCSRYGTQTHKCSAGWGFDIGDSPCWLYGSGGSAANGTAAGGGGGSSVAVLPAAAQNSSAYPEDPENNT VWYSQIPELYGQTEYKPDMLLKDVNRKHKSPYDRPHLVWHRANHRAHPLSRCGASRCSNGRGFCLQYDGRPEPECVCHFGFNGTQCEQGDNWEACWFSPD CGGHGTCHSGFCSCKDGRWGIACHRSAAVAPAVPGTIPDMRVATRFKIYMYDLPWDVAFPFEVQEDAHGRDPMYTAYEYFLKYFITDNIVRTENPYEAHL FYVPALNFFYSGN…
CrGT47_10	Cre04.g211950.t1.1	Chr4	1794843-1801407	MWPEQDVAIPNYLDTPWLHQMDMAFESLGGGRYKPKPVDRPYLFHFHGFSKPDMAYSGGVRQGLLAMFKNMSRPDVLINKGA GPSFTAKFEFCLAPLGYGWGIRFTQAMFTGCVPVLIQDHIYTYFWDVVPYEKFSIRVSRHNLHRLFDIIEAVTPEQLAELQQGVADYHQHFSWHGRHGGL AYNNTMTSLHRRLLNMWTALFPGTT*
CrGT47_11	Cre04.g211900.t1.1	Chr4	1801454-1814769	MDLDIGRRTLYVCLLTILSLAQCSAKVEPATPQNKECPPGCTDHGNCNGESGECECQFGFGGPDCSQRLLPACHLAPEVKGS IPAFGHWMPKNCLCHAQLRKYGCPRPHFEDPYNCPFYQFWAWNEIPCFLIKDVPDDQQYTLSPDGPTDPRVVWKKGHYNHTSARSGIDPYQLVDAPPPSP YTLPDQSTWLPLDKCGDSKCSGRGWCALAPRIDGHPPPQPQCRCLGFYGGDACETPQAEHCFQGCSGRGTCHGGFCHCKPSYWGLACARSQAYVSDTWLP HPSKLRVYVYSIPEQLAFKKPWHDIPALVDTMYLAEVSFVDSLLGDGAVLTQNPWEANLFLINAYTFYFTGNIGYPARHFSSVFNYVRTKYPFWNLTAGR NHIALATNDRGTC…
CrGT47_12	Cre05.g233450.t1.2	Chr5	305123-313268	MAETPLRCLNACNGRGKCYAGWCHCQEGYYGADCSLSLDGQGRPQQLAGMGYAPAPGGPRIYIYELPPRFTTHKNLDKFDRP LYAHLWKRIISSGHRTLDGGAADYYYIPVDFRYLFGEAAQVLSYVADTWPWWNATGGARHLLLSTSDLGGCEGKQLMRIRNATSQSVWVTPWGLTRKHPR VWWPGCHRPGLDVVIPIPAQTPNMLMTPLNPKVKPMERNITFYFAGKICGDNKDPKSDTSAWPICQTPTNPLYSAGMRQAVYFHHSKRPGYVIVPRSRTY VADMSSARFCLAPTGGGHGKRQVLVARFGCVPVPVTDWVLQPYEPELDWAAFSVPVAEADVPRMHEILAAINDTALARMQRAVACASKHLWWSSMWGGLF GDDGRYDAFATLM…
CrGT47_13	Cre06.g278093.t1.1	Chr6	3442334-3449293	MFARLRSRSQRLLIVFGLASGCVLVCLWRTAEATDGERRGLASGLRSLLHFEMPAGAHISLPDPPKVLVAAAEPEDNSTRPH HHHEMDPEAALRRRCALVKGTWCGEFLRQVRLPARPVPRGRKECPNACSGWGNCNHDTGMCECPAGHGGEDCSKPVKRPCAHRHRNISNPNATEPVSSVG PNGLDIGPTTVQGWTASRCFGFCDEDVAACYCGEGRYARIPPPPGSPPWTPPVQRGRPLADGCQPNTDATGAKSFAAGGGTSWADIYGPNGFCNDPNKAT RCGCFQEIAFPCDGSVPMETTCMNQCSGHGECHFGYCRCHKFWYGSDCSRKKADSGPLEPALHESERPWLRPVVAVPPAALETPPISTRPRPLIYVYDVP PDYTSRMLQYRNF…
CrGT47_14	Cre06.g278094.t1.1	Chr6	3449984-3458225	MPGNPHEAVRKRCALARGTWCGGWMRQDPLPYKAVPRGSKECPNACSGWGNCNHDTGLCECPAGRDGDDCGKEFKRPCTDHH RGKGDVLRTEPASHIGPDGLDLDVTNLRWTASRCHGYCDDNVAACYCGEGSLRRIPAPPGAPPWTPPVQHGRPLADGCQPATSKTGLKSWGQVKYDDIYG PSGWCNNRTSAFECGCFQEIAHPCDGSVPMETTCMNQCSGHGECHFGYCRCHTDWYGSDCSRKKAGTPVEPPLQEQRPWLQQVTAQPPAANVLPLPGGRR RPLIYVYDVPPKYTSRMLQYRLLAHACLWRRWLDGNNTELTGWTYSVETMFHELLLQSEHRTFDPEEADFFYVPHYVTCYFWPIMGWADAPWWHAPYVDS RPMHGANMLTELH…
CrGT47_15	Cre06.g278220.t1.1	Chr6	4100946-4107847	MSRRLALLVLLFSVVLVLTQAEDAVLKTAVEGKPFNVFQELKKECDPGCQQCNRELGECECPYGLSGPTCQVALWPACRTST AAGLPVFVGRRAPRNCHCYRQLFRATCLPGSESRCSSHTVAHWPDLKCFEQPDKPEQEQLSELPDTLDDPAYRWRKGVLLPAPAGGTGVEGAAGGAAAAE HKDFQTLPAPPALKEIGDTVALGKCPNRCRDRGICIANSETVKTPSCLCHPGFTGTDCADVVPPASLPLLCPNGCGGRGKCAAGFCACDPPYWGIGCSRS KAYQPVPDSISHPYYPSLKVYMYDIPISVVGPQPFDDGDATVYLIYQASMHLMNAFLADTGGVRTQNPWEANLFYVPTFAYFSTANLGDPTAAVVRAIDW VSSKFPFFARHGG…
CrGT47_16	Cre06.g311950.t1.1	Chr6	9005696-9011607	MRPVTAAAACLLLVLCRLSLGLESVPRDTPWSSGPDLPLESALHWLGADADAENVVSADTGDHHGRQLLQVGAGATGRDLER RCRSTRGGWCGKLDALAPVPLKPALRGNKTCPRNCSGVGNCNYDTGTCDCPAGSQGVDCGTVLLRPCTTAFRHTGDTPVGHIDDEGRDLNWRDEGYTESR CTGICDPVTARCFCDGKYRRVNPPKGSLPGTPAPVRGRPLGNHLCQVSDDGKGHKLEWGQVPFEQIYGPDGWCNSDQPVIKCGCMFDGFAGELCEEVTET MCVNQCSGHGDCDSGFCKCHPGWYGTDCARKASGLAMEPGLHVSGTRPWLAETVVVSPEAAAASAAGASMARGSGAMPLHGAARRPLIYVYDLPAAYNSR MLQYRNDRGMCTW…
CrGT47_17	Cre07.g325050.t1.1	Chr7	1613854-1621517	MQLQHWLALSALFLLLVSQLSTGLGGRSLASASASQNGTAPIKQLNLEPLTENSAVESRCARTTGPWCYNFHTQTPVPWRPA PRGSVDCPGNCNNVGVCNHDTGYCHCRAGWIGEGCTTRRTRPCTNHIRTPESESTEPLSYIGPDKRDLNWTELGFRASRCFGVCDDDLGACYCDGPMGRV PAPADAPPGTPPIRRGRPLTHAHDQPKTTWDGRPTIGTTDYNKMYGPKGYCNVSEPDWAPSMCSPDDLGGKFCDDPVEAFCPGACSGHGFCDLGFCRCNE GYYGHDCARRKAGLPLQPSDIEQRPWLSFHVREPPAALEPPPKPTRKRPLIYVYDLDPLYNARLLQYRIVQTWCTHRHYHTGNTSTWSATFYGLEAALHE YLLISEHRTFDPE…
CrGT47_18	Cre08.g382560.t1.1	Chr8	4492915-4501196	MNLQRQRWITCLLVLGILLRLAAASGREQGVSNPGRRLRSERVLVAGDAASSDGEEALAAPSRPSRCPGRCTEFGTCNEELG RCDCPIGRNGTDCSEEVPAGPPLQQLCARYGHTLASCSRVDAAGCVNGCNGRGRCVGGFCHCRPGYFGADCSLSLAADAADGSSTTSTTSTSDGSGSSSS ASSGSPRPAVEILAGQGYTVRRSAPRIYVYELPPDLNVYGNLERLDRPLMYMVWQRLLSAGVRVADPAQADFFLVPVRVRLSYDSEKVVQAVSYIRATWP YWDGQPGGAAGERHIFVHTGDWGRDELSEEAQALTRNATWLTHWGLARDHEFAGWKAAHRPGRDIVVPLVLQASLLSSYRITRTTPLHPGSAAGGRQPRP RSRTLFFAGRVCG…
CrGT47_19	Cre09.g390750.t1.1	Chr9	2552184-2560640	MELYKSLGLALLVLLGLCSQYALRDKGATLDSRPSSAASGWATFSWPFAAVSVAGPRRTLLQDVENDKHADEVVHQLIVRLN ASRLAPLPVRPQERCVLTRGNWCMQFHLQEPVPRFPPPYYDKPCPNDCNGVGNCNHEYGTCSCPAGWGGADCSQPRKRPCHHMGEGKRDAGWHNLTAWSH TRCAGVCDDDVAMCYCPADTKYGHREAPPGAKPGTPPEQRGRPLFMCTPGTDKDGKKVLWGGTPYEDMFGPEGWCNADKPKFTCPCRLDGLLGLTCSEVV EQTCTNQCSGHGECNQGFCKCRAGWYGVDCGLRRRGVLPQPGDQWTTKPWIEPVLTHTVATEDPPLTPVRRRPYIYVYDMKSDFGTDLLQYRIEGSHCLY RSFARANQTSFVG…
CrGT47_20	Cre09.g388393.t1.1	Chr9	3319110-3326331	MVMLRRTFVALVCWAWASHTHSSALPAFRTIAKPCPEGCTRAGNCNAETGLCECPFGWTGPVCEVPVLPACRISASQDASSG PPMVGSVFPKNCQCLKQLQNISCLESRYVYDYYLCEHGAFWSWKSMHCFEYSNRPLDQQLSGIPEPDAAGVVWKKGEWLSVVEGQDPFSFGNVSEPPKTA MNSKQFFPLSRCPDRCNERGNCFAWGAGHPPQCDCAAFYSGKACETVEAAHCPLGCSGRGACKGGFCHCQPGWWGLGCSRSKAYEADEYAPHPTRLKIYV YDLPESVVHMRSHSDEWPLHFPIYLAEHEFFNRLLGDWATRTENPWEANLFYIPTFTYYYIGNVGQPGKLFSRVVSYVRHNYPFWNMTGGRNHILTSVND RGCCDIYRLGPDV…
CrGT47_21	Cre09.g397956.t1.1	Chr9	4974095-4982590	MSIGLAVSRLLFAAWLAAFLQIRCIHARCSAECYKHATCNEAIDGGRCDCPKQLAGPDCSLESAARVSPHEPCLNNCTGRGV CAWGECVCRRGNFGSDCSLSVAADDVDGGSSRSSRGRDSGGSSRGQQQQQPLKLQLLAGGNTPYVPRRRRPHVYVYDIPHNLSSWHHPKNMDRGLHWLFW QRLLASGAMTADGDTADWYYIPVKMRSTSDGGRLMEAIEYVRRHWPWYDRLQGQRHFVIHTGDLGRGEVTRSVREATPNLTWLHHWGLTADAPHSGWRAA HRPGKDIVLPIHMGSRYSSRAAGLHPLAPQLPRSSGLLFVGRICGDRSQPDPARGWPHCATDRNDGYSQGVRQQVHYHHHHRPGFKVTASDPHYGLDLLR YRWCLAPSGGGHG…
CrGT47_22	Cre09.g414750.t1.1	Chr9	7604838-7611389	MSARNRARWRHFFGLLAALCLTNVVLHASGAYGQTAGLALDRNGSSQGRLSRERKFALTQTTPAAVRCTAAKGKWCEDFLLQ EEVLWKPAPRGSKECPDNCNNVGRCNYDTGYCDCAAGWTGVGCKTPQKRPCTSTWREPEDPSKIPTSHIGPDKRDLNWTVWSNIHSRCGGICDDDLAICY CDGQGPNQFGRIPAPPGSPPGTPPIRVGRPLVTEYMAPNETWDGKWAFGRQPYSNVYGPQGYCNVSKPVWAAVCSMDALAGPTCDEPLESFCPGACSGHG RCYLGYCYCDEGYYGHDCARRKAGLPLLPSSIPTTPWLASVVREPPAAQEPPPVPTRKRPLVYVYDLEPFYQARILQYRVSPPWCVHRQHLYPGNTTRWT DEWVYAVDTLLHE…
CrGT47_23	Cre09.g414900.t1.1	Chr9	7622768-7631007	MQDLEKYPSWQTVVKEKQKVYHTGAPQHALNASVLQGTDGGLFEFVMIESLKAVCEGHVCKRKPVPWKPAPRGDKECPATKY GACNGVGVCQHDFGLCMCQAGWKGPDCGVRDPRPCTHRFRLPSDANQTVPMSHVGPDGRDRNWSVPGWTASRCAGYCDEDYGLCYCPPDTRLGRVPAAQG SAPYTPPIKIGRVVGDTCKPSRDPANGNAKATWGSTDPDLIFGVGGWCDNETHPTRECGCLVDGVEGYTCSVITDIFCLNQCSGHGDCLYGYCKCHEGWY GMDCARRRASSAPIPKAAFEDAFPKHHQGVVSFPAAARDPPPAPTRKRPLIYMYDLDPLFNTRMLQYRLVRTSCLHRMFRADNSSTFVTHGYSIETYFIE LLMTSGHRTYDPE…
CrGT47_24	Cre09.g417250.t1.1	Chr9	7916474-7929250	MVGFDSKDLPTWEHILKEGRKTYTPGPGRKATNGSVLLSQHLGGVYDHLLNEHLKYVCDEGASKCKRKVCAMARGSWCKKYY EQDPIPWKPAPRGDKECPKSKYGICNGVGTCQYDIGVCLCPAGWRGDDCGTRDPRPCTHRMRTPALDGENTEPVSHVGPDGRDRNWSVPGWTASRCAGYC DEDLAMCYCPPGTKYGREPAPAGSPPGTPPVKVGRPMGDSCKPNRDPALKDGPRTEWGGVDPDSLFGPEGWCNAEQPRHHCGCILDGTYGHFCDVQSEVF CFNQCSGHGDCHLGFCRCHEGWYGMDCSRQRASAKTREKGYHEPGGARPYLEHIVVDPPAAKDPPPSPTRRRPLIYVYDTDPLFNSKMMQYRIAKSSCVY RLFGYANESNFNS…
CrGT47_25	Cre10.g430100.t1.1	Chr10	1678406-1683991	MKFVHAQKDAQSTTQQQSRRIPLCSVLCLLLATCSRAEKRNATCLTDQCFEYGTCNPETDRCECPLGRHGLDCSIPIPDPEP QCKEHSHNLVTCTSFTKTLCLNSCNGQGWCAGGFCHCKPGFYGADCSLSTSPDGRPVLLAGQGYMPRQHGVKIYVYELPPVANTWTYIARIDRPLVQVLL QRMLSSGVRTTDGDSADYYFIPLLMRTRTHTVNHLAAVVHYVRKHWPWWDRTGGGHRHLLVAPGDIGRRILTPELLHMTENCTFLTHWGLHRNHSGGNWL ASHRPGKDIVVPPLTPPDEPIVYSPLHATLKKNRKSRLGELFFAGRICGDNQKPTDGKCSEKRQDYSAGTRQQVAHHHWNRPNWTITTHTPAYAEALSTH IFCLSPTGGGYGR…
CrGT47_26	Cre10.g430250.t1.2	Chr10	1696543-1702374	MLDEDADEGTNLDDSDSGEGPSLADAVAARVVNSTCAPGCSEHGVCNEELGRCDCPRHFVGPDCQTPNPEVSDVCAKYGFTV SQCRGASPCFNSCNGRGRCVAGVCHCLPGFWGMDCALSRGADGSVQLLEGQGYVPRKDSIKIYVYELPPNVTSWFNIKRLDRPLHLLFWQRLMSAGLRTV NGDEADYFFIPLNTRTLMAPEQAAWILPYIRNTWPYWDRDNGHRHLIIHTGDMGLHELPLGLRRKMNETLSNITWLTHWGLHTYHPIGTWFPAHRPGKDI VIPVMITTPGFQLSPLNPAVAEKAAKRGRPYTREQTFFFAGRICGDRKPPDPLTHECAPKRTDYSASVRQRVYFHHHNRTGFKVLTGTSKYMQEITSHKF CLAPTGGGHGKRQ…
CrGT47_27	Cre11.g467660.t1.1	Chr11	922544-935445	MARAPLAALCLVLCFALSASTSESSSSSQDVFAGFFRRLMKSGGVPNPGLGKRALPRDANTTEAVASLYDHHILHQSNKALG TRGRKGRGSRGGGGGGSGAADGHVPACDRSGGKCSLCAMTRGAWCEEYHRQDRVPWKPGPRGDRECPKTKWGVCNGVGNCHYDIGVCQCPAGWKGRACDA PDKRPCTNGHKSQNDPVDLIVTHIGADGMDLDLSEGGWTASRCAGFCDADRASCWCPPDTKHGRRPPPPDSPPWVRWSQRGRPIGEACKPGKVPNKEGKV VENDWGNKGMSLSDLWGPKSWCNADSAGQVPSSANQACGGWRGCQEEGLHGALCSDVSEETCLNQCSGRGECDSGFCRCLDGWYGHDCARRKAGEPTDVP GLQESRPWLKPLV…
CrGT47_28	Cre11.g483400.t1.1	Chr11	3794387-3801990	MARPRPLCSAFLALVLTLACVHASFQDDFDIVWGISHGVWGSGRSRIGRRLLTRDLSMDEIFRYWQKMYGKWPTDVYETHLT DYRNHVARSGREFGIPRNDQEFLDLYYYLRNRTEVPRAVGWTPERERCAPGCYLHGTCNQELGRCDCPRGRQGPDCSEPLATSCREFCQHDGQCHRVIRE WCINECNDRGSCVGGFCHCWPGYFGTDCSLSVDYEGKEPNSNGPNTTVLLAGQGYRPNPRGPKIYVYEFPPQYHVWSLLWLDRPLNIILWERLMSLGLRT VNPEEADYFFLPGCGRGCNKWDQKFKYIMEHYAKYWNRRNGRDHLMTHAGDWGRCEKAWGPDSAPFIANLTMLNHWGITVDRSQETEHDLFNACHIPDQD IQVPVLCGDLYPQ…
CrGT47_29	Cre12.g502500.t1.2	Chr12	2825587-2830288	MSREEGSWRCLLPILVLTLVTCSAAVEEEDAAESQSALGYATIKPGVCSEECYTVATCNEELGGRCDCPKTLSGKDCHRKAT KGNLHAFGQDSARELRAPFPCLNDCNGRGKCVYGACVCTRGNFTSDCSVSLDPDTQQPVVLAGSGYEARRKRPLIYVYDIPHKLSSWYNVLKIDRGLPWV FWERLLGSGALTANGDEADWFFIPVKLRSTTDGYKLQEAVKYIRSKWPWFDKYDGNRHFVLHSGDTGRGEVTGAIREDATLANITWLHHWGLTEDYPSSG WRKAHRVGKDIVVPIYFGAKQGHAFVPMSGLHPLAPRIPRNGTFLFSGRICGDHSLPDPEKPWPHCATNRSHGYSQGARQWVHFHHSQRPGYKIVVSNKE YPVDLLNYKWCLA…
CrGT47_30	Cre12.g502450.t1.1	Chr12	2830337-2834918	MNHPVHRLAAAWQLRLVSILLVALVASKGKVDEEALEQQAPAYTAPTPGVCSERCYDIATCNEELGGRCDCPKTLSGSECHQ KATKESLQTYGQSTVKEAKDPLPCLNDCNGRGTCVYGACVCTRGNFTSDCSVSLGPDTQQPVVLAGSGYEARRKRPLIYVYDIPHKLSSWHNVMRADRGL AWVFWQRLLGAGVLTTNGDEADWFYIPVKLRSTSDGYSLKDAVSYIRSHWPWFERYGGNRHFVLHSGDTGRGEVTGAIREDATLANITWLHHWGLTEDYP SSGWRKAHRVGKDVVVPIYLGVRKSAGLLPLSGLHPLAPRIPRNGTFLFSGRICGDHSLPDPEKPWPHCATRRSPGYSQGARQLVHFHHSQRPGYKVMVK NKEYQVDLINYKW…
CrGT47_31	Cre12.g561101.t1.1	Chr12	6845578-6872944	MTAVVLITILCLLSGSINAHYNDDGGHLQGRLLRVDDDPVAAPTNFKSRCVGKCTQYGTCNEDIARCDCPKNRTGDDCVDIA DTDTLTSRCRRNYYPSVKECTTSELSCLNNCNKRGTCVSGWCHCKPGFFGADCSLSLDAEGKPELLAGTGYATRAKRPWVYVYELPPDLTTWTNTKRLDR STHIHFYQRLLGSGARIADGDKADWYYIPIRQRMTADSRFLSEAVAYISATYPWWNRTGGSRHFVIHTGDLGADETQLGARLQAPNITWLTHWGLTMDKV FSGWKKAHRPDKDVVIPVFLTPGHFKHFGLERTPLHPLMDKQERTTTFFFAGRICGDRKPPKTGSWPNCGPRSPGYSAGVRQLVHHHHWDRPGFKVVLHE PNYGAALGSSKFC…
CrGT47_32	Cre12.g561050.t1.1	Chr12	6873368-6878199	MPGRRPAPLLLVALVWALGCQLRVNAFFFRSKPAPKQHPEHPAPALARAPAPAAAVGVPFTPGVSRCPANCSRFGSCNEETG SCDCLRNRMGPDCGRKLMRPGMLQRCQDMGYKDVKECLAKDQLCVNACNKLGRCVAGVCHCKKGYYGIDCALSMGQDGQPVLLAGKGYATRAKRPWVYVY ELPPELSAWYNHRRLDRPTHMLFAQRLLSSGARIADGDQADYYYIPVRQRSAPESSLLVDAIKHIRQHYPWWNRTQGHKHFVIQTGDWGRAEMDPNLLQL TENMTWLTHWGLTTDRHDKILRWVPSYRPEKDVVVPVFISPGHFVKFSMIHTPLNPANKAKPRDKARFFFAGRICFNSKYPTKATWPHCDGDHWAYSAGV REKVFVSHWNRSG…
CrGT47_33	Cre13.g564450.t1.1	Chr13	389464-392215	MLSDRGSSLRSTCLGHVSPRHVPLHTHGSTRVRLRTALPPAATRVQVRLYGACFLHTLLNSSGLPLVSRPQDACVLVPSLDA NCAFNTCDETKLTQLGAALAALPHWDGGRNHLVFNYNNDWEHARFSVGQAIVARASWVKNTYRRGFDIQLPLTRPKITPPDVWVLAWGEELLQADRRAGA GGSSSGSSILSPWQKLELPQPPAAGTDASSASAAGNASQGVGAQPRRWLQGMVEAPDAAAGAWGEDTEALGGRLWSWDSKLLPAAQQPQHGAQVLQPQLQ LEPRRRLQAASAAVRQRNEARVSSPHARHLSWWFWPWDRKSTGGRSGGDTVRGGASFNDTHLTGPLRHDLLLYFNGCLLPRWYDCDATRPRLFDILNAQL PPARPHLRRGVVL…
CrGT47_34	Cre13.g577050.t1.1	Chr13	2035756-2040621	MPDVRASGLSCPAGTSYSSLSLCYWSSPRAAATVQSWHVVGVGSTTLPPRWLVWTLVGAACLASWMHGTMAVQCHQGCTLHG VCNEELGRCDCPRTRAGAACEVQLTGEPLKQRCKSMGFSGISSCTSEKNTCPNNCLRRGTCVAGFCLCQPGFFGNDCGLSMVPAGPNGTRTPVVLSDRGY TPRAAGPRVYIYDLPPELTTWRNDDRLDRWTTRHFLEMLTATGARVGDPAAADWFYLPVRLRSSSDGHVLRRALEYVQAAQPWFNATGGKDHFVLAVGDM GRLESERGPLSANVTFVSHWGLYRSKAEQLQSPHWRASHRNATDIVLPVYLTLRKLQKFGILGSRHHPKFATVAPPDVRERNGPLFWFAGRVCQDSSPPR TDVWPNCPKAMGY…
CrGT47_35	Cre13.g577400.t1.1	Chr13	2075690-2080695	MPRDRLRLVVSHGARRLPGPPVLSVIAIALAVLAQHTRAKPCAAGCTVYGTCNEELGRCDCPRNRTGPACHQPLSRKALAER CRLLGTQDVNKCNSEANTCINGCHGPTRGACVAGFCHCRPGYFGNDCALSLGGADGKTPVVLSDRGYTPRAVGPRVYIYDLPPELTTWRSDINLDRWTIR HFLEMLTASGARVADGAKADWYFIPVRLRSSSDAYVLQRAIHHLRHAHPWFNATGGGRHFVIAVGDMGRLESERGPLSANVTFVSHWGLASSKKAERLNS SPWRASHRNATDIVLPVYISLRKLEKYGITRSRHHPKFATMAPPEIRERNGPLFWFAGRICQDRSKPATDGVWPNCPGAMGYSAMTRQAVHFHHWDRPGY FVAPGDKNYSRHL…
CrGT47_36	Cre14.g619854.t1.2	Chr14	1779333-1791118	MRGWHTRASTTFCSSSLLVAIIAHVAFIAYVLETVDTSATPAVVQRLLPCPAGCEKRGNCDAERGVCQCPWGWDGPACEHDR MAACKSTSRDPGFCGSTVPKNCECYRECYRLYCPARSPWTGSDLEDVCTHGAGRGLYRAHCYLYNSDSGHPANDSVYPADLSATTWFRHIPEVEGGHRYR NSLKAPELAGAPGKWEGSLLRPAALDECADRCSEGQGVCVVPNPDSWEWSFERLQDTRKDDDDQAEAEGGKGEEGKGEAGAVTWDDALGEAHGEEEEKGL KEPRPRCWCRLGFKGRTCAELNPESCWFSPNCSGAGTCRSGFCHCRPGRWGLGCARTAAYQPALIAAAAAAAARAAAPAVTAGAGATGAAVAAGAAGPAP ARAAGAAAARAAA…
CrGT47_37	Cre14.g622050.t1.1	Chr14	2064366-2070707	MPHTCWRHLLAYVLLALGSSLAWVLPEQEDVLTDADHAALLSLGEHQLHSGRQQRAAALVAAWRRVQQEEGEEGTGDADTTT TGGRKVCSADCYKWATCNEELGRCDCPKHRAGESCERNASAAAMRYFVQSAAREAEQPLTCLSGCSGRGACVLGGCVCERGFWGSDCSLSWAADGRGLVL LAAGGPRPAPPPRAAPPRVYVYDLPHKWTSWFHPKKLDRATHWALWERLLSSGVMTADGEQADWYFLPLKLRSTGDGPKLLQALAYVRKHWPWFDRLQGH RHFVLHTGDSGRGEVQAAVRAATANMTWLHHFGLIRDFPYSGWKAGHRPGKDVVVPILFGERQGAAFLPLSPLHPRSPPGQLLRRGLAGDGSSSGTGGSS SSSGGSSNIGGSS…
CrGT47_38	Cre17.g721750.t1.1	Chr17	3154966-3164817	MDAACTRSLGLVLLLLVLSDASWLPWTSEQELAASSSSSRRRTLLQIGFQVPKISIQLPLRQYLNGSNSGAAGAGSNRTDHS ELAGAAGGEARRDEGDLRRRCAVAKGSWCGAYLRQDMVPYKTAPRGDKECPNACSGWGNCNHDTGLCECPAGRAGPACEREVKRPCTNRFRHPHEVNVNE SVGHIGPDKHDLDIQAPGWIASRCSGYCIDHLALCTCGRDSKYRHIPAPAGSPPWTPPVQWGRPMTDGCMIGVDKDGNRIDWGRPHIKDSDLYGPEAWCN KDNPISHQCGCVWDGNGWPCDGSQQYEPFCPNQCTGHGDCHMGWCRCHPGWYGTDCSRKKAGMELDEGHLSRPWIKRTVDVPPASLRTPPLPTRPRPLIY IYDLTDYTTKFLQ…

## Sheet: Panicum virgatum 
CAZy Family _Gene ID1	Model	Chl	Chromosome position	Protein sequence
PvGT47_1	Pavir.Aa02592.1	Chr1a	56139712-56142416	MTGARTAVLLAVASLSSSGAEVAGGAALRKIERIAGSAGDVLEDNPVGRLKVFVYDLPSKYNKRIVTKDPRCLNHMFAAEIFMHH FLLSSAVRTLNPEEADWFYVPVYTTCDLTPAGLPLPFKSPRMMRSAIQFISNKWPFWNKTDGADHFFVVPHDFGACFHYQEGSIIIPPYAPPQKMQAHLI PLDTPRSIFVYFRGLFYDNGNDPEGGYYARYERAVLCLCPLGWAPWSPRLVEAVVFGCIPIIIADDIVLPFADAIPWEEIGVFVDEEDVPKLDSILTSIP IEDILRKQRLLANPSMKKAMLFPQPAQPRDAFHQILNGLARKLPHTQSVYLQPGEKHLNWTAGPAGDLKPW*
PvGT47_2	Pavir.Aa03119.1	Chr1a	65533871-65537168	MAGRVPGAAASSPLPRALLLLAALALFTLSFLSLRSLRPAAGPSFPTAGVSFSLGAADKPRPVLPLQPSSSVYHSPEAFAAGYAE MERSFKVYIYPDGDPKTFYQTPRKLTGKYASEGYFFQNIRESRFRTDDPDKAHLFFVPISPHKMRGKGTSYENMTVIVKGYVEGLINKYPYWNRTLGADH FFVTCHDVGVRAFEGLPFMVKNSIRVVCSPSYNVDFIPHKDIALPQVLQPFALPEGGNDIENRTILGFWAGHRNSKIRVILARVWENDTELAISNNRISR AIGELVYQKQFYRTKFCICPGGSQVNSARISDSIHYGCVPVILSDYYDLPFTDALDWRKFAVVLRERDVYQLKSILKSISQEEFVSLHKSLVQVQKHFVW HSPPVPYDAF…
PvGT47_3	Pavir.Ab02277.1	Chr1b	43071930-43073690	MENGGGGGGGRVAATAVPLVAVALLASAFVLPGPAAFLGGESAASREHFLRHVPHEPQKPAARVPASTPPAAGKVSVGPIEEGLA RSRAAIRRAAREAPAAAAESARRSFKDVGDAFVPRGAIYRNPRAFHRSYLEMERKFKIWAYREGEPPLVHLGPGADIYSIEGQFLEEMEDPRNPFAARDP GEAHAFLLPISVCNLVHYVYRLNTTARVEPMRRMLSDYIDVVAAKYPYWNRSRGADHVIVSCHDWGPLVSEGNRELYANAIRVLCNANTSEGFRPRKDAT LPEVHLADGILRRPTFGLPPENRTTLAFFAGGMHGHIRKALLGHWLGRQDPGGMDVHEYLPAGQDDYHARMARARFCLCPSGFEVASPRVVESVFAGCVP VIISDGYPPP…
PvGT47_4	Pavir.Ba00640.1	Chr2a	8093929-8097780	MWERGRPPRKPRPSLIIVPPPPPPPPRLNLLLPRSLLALAARAMPSRRPSPFLLVLLALALALLFLLLSPSSPSASRLSRSLASG SASATSSPASPAAPPAPVKIYMYDLPPKFTYGVVRSYTAARAPSGSADAAAVLPDEQLRYPGHQHSAEWWLFKDLLRRGPRDRPVARVDDPHDADLFYVP FFSSLSLVVNPIRPPAAANASGVAAAYSDEAMQEELLEWLERQPYWRRHGGRDHVFICQDPNALYRVIDRISNAILLVSDFGRLRTDQASLVKDVILPYS HRINSFKGDIGIDGRSSLLFFMGNRYRKEGGKVRDALFQILENEEDVTIKHGAQSRESRRAATHGMHSSKFCLHPAGDTPSACRLFDALVSLCVPVIVSD YIELPFEDVI…
PvGT47_5	Pavir.Bb00542.1	Chr2b	8466961-8471003	MRASVSASSAAAPCVPCLQVHGNGRAVAAAYAVAACLVAVTFLALAALDPRTQASSWFLS SSSSSSSSIASFSSLQPSGGGGDAEHLLVTSSSFSDGGRDGGRRNSSGKEVHEELQVGGD DLLLSLISPSSGHDAPPQLSITPPVAAPEPEPTPAALAPAPATMVKMIYEPNSHDMGPLK RTVSDYISVLSTKYPYWNRSLGADHFMLSCHDWGPYVSSANDHLFGNSIRVLCNANTSEG FNPAKDVSLPEINLRSDVVDRQVGGPSASRRPILAFFAGGNHGPVRPALLAHWKGKGEPD VQVSEYLPRGVSYTEMMRRSRFCLCPGGYEVASPRLAEAIYLECVPVVVDDGEYALPFAD VLNWGAFAVRLRAADIPRLREVLAAVSPRQYIR…
PvGT47_6	Pavir.Ca01824.1	Chr3a	24717594-24720511	MGKGSVRALALALAVLLACSGVAVVTAQDTERIEGSAGDVLEDNPIGRLKVFVYDLPSKYNKKLLKKDPRCLNHMFAAEIFMHRF LLSSAVRTFNPEEADWFYTPVYTTCDLTPSGLPLPFKSPRMMRSAIQLIATNWPYWNRSEGADHFFVTPHDFGACFHYQEEKAIGRGILPLLQRATLVQT FGQKNHVCLKDGSITIPPFAPPQKMQTHLIPPDTPRSIFVYFRGLFYDTGNDPEGGYYARGARASVWENFKNNPLFDISTDHPPTYYEDMQRSVFCLCPL GWAPWSPRLVEAVVFGCIPVIIADDIVLPFADAIPWEEIGMFVAEEDVPRLDSILTSIPTDVILRKQRLLANPSMKQAMLFPQPAQPGDAFHQILNGLAR KLPHGDNVFL…
PvGT47_7	Pavir.Ca01825.1	Chr3a	24721931-24725443	MGTGRARALPLALALLLACSDVAVVAAQGTERIQGSAGDVLEDDPVGRLKVYVYELPPKYNKNILAKDSRCLKHMFATEIFIHRF LLSSAVRTLNPEEADWFYTPVYTTCDLTPWGHPLTTKSPRMMRSAIQYISKRWPYWNRTEGADHFFVTPHDFGACFYFQEAKAIERGVLPVLRRATLVQT FGQKHHVCLKEGSITIPPYTPPHKMRTHLIPPETPRSIFVYFRGLFYDTSNDPEGGYYARGARASVWENFKNNPMFDISTDHPPTYYEDMQRSVFCLCPL GWAPWSPRLVEAVVFGCIPVIIADDIVLPFADAIPWEEIGVFVAEDDVTKLDTILTSIPMEEILRKQRLLANPSMKQAMLFPQPAEPRDAFHQILNGLAR KLPHGKGVFL…
PvGT47_8	Pavir.Da00750.1	Chr4a	12041201-12043117	MEGNYPKYFFYVLFLLGSWLLTCLLHFRQPLFFHLSGGGTAVFLPFSRKASFFSTPAAAVDVADDRRSTPPASCDGRYVHMVDLP PQFDVCAEGSPAFESEHSICQFMSNAGLGPVLLPAGGNRSDGDDADIVPNTGWYNTNQYALEVIFHHRMRLYDCLTGDPAAAAAVYVPYYAAMELQPHTC GLFNATVRDGATGRLLRWLSSRPAWAAHGGRDHFMVASKTSWMFRRRAPPAAGGGGDDGTGCGNSFMEKPESRNMTVLTYETVIWEQPQRDFAVPYPSYF HPSSAGEVAEWQARVRTAPRPWLFSFAGARRPGTLAIRDRIFDACDAAAAAATPRHRCGKLDCGGPDGGVACRSPRKLMALFTSSRFCLQPLGDSFMRRS SVDAVMAGCI…
PvGT47_9	Pavir.Ea03204.1	Chr5a	54520220-54527729	MAGKQFPSLAHARPASASASSRRLLAAAGALVLLSAVYFLLLSPSSPRPADAVLASHTPTTSSFLASLESFLAAPHPSDSAAAPG DLDAAIRAQEEARLLGDPAWPAPAAGPLRVYVYEMPSKFTYDLLRRFRDSYHKTENLTSNGSPVHRLIEQHSIDYWLWADLMAPESQRLLKSVVRVQRQE EADIFYVPFFTTISYFLLEKQECKALYREALKWVTDQPAWQRSEGRDHVIPVHHPWSFKSVRRFIKKAIWLLPDMDSTGNWYKPGQVYLEKDVILPYVPN VDHCDSKCVSETQSKRSILLFFRGRLKRNAGGKIRSKLVEELKSAEDIVIEEGSAGAQGKAAAQDGMRKSLFCLSPAGDTPSSARLFDAIVSGCIPVIIS DELELPFEGI…
PvGT47_10	Pavir.Ea03427.1	Chr5a	56218278-56224491	MTWKHVSNPDRLQQQGPLAGLPACPLLLTGDPIAARSVSGSGGSPTSYRSMRHHHACSRAHQVGALLLVAATFLLTRLFDRLLLD ASSPSSPSSPLSAARPASSADLRIYVYSEDEIQGLRALLRGRDGTVAAATCLKGQWGTQVKIHQLLLKSRFRTFTKDEANLFFVPSYVKCVRMTGALNDK EINQTYVKVLSQMPYFRRSGGRDHIFVFPSGAGAHLFRSWATFLNRSIILTPEGDRTDKRGTSAFNTWKDIIIPGNVDDSMVKSDARAVQPIPLRKRKYL SNFLGRAQGKAGRLQLVKLAKQYPDKLESPELKLSGPNKLGRIDYFKHLRNAKFCLAPRGESSWTLRFYESFFVECVPVILSDEVELPFQNVIDYSEISI KWPSSRIGPE…
PvGT47_11	Pavir.Ea03872.1	Chr5a	61598227-61601376	MRRRALAIAILAAVLFLGAEAQAVQQGHQTERISGSAGDVLEDNPVGRLKVYVYDLPSKYNKKLLKKDPRCLNHMFAAEIFMHRF LLSSAVRTFNPEEADWFYTPVYTTCDLTPSGLPLPFKSPRMMRSAIELIATNWPYWNRSEGADHFFVTPHDFGACFHYQEEKAIGRGILPLLQRATLVQT FGQKNHVCLKDGSITIPPFAPPQKMQAHLIPPDTPRSIFVYFRGLFYDTSNDPEGGYYARGARASVWENFKNNPLFDISTDHPPTYYEDMQRSVFCLCPL GWAPWSPRLVEAVVFGCIPVIIADDIVLPFADAIPWEEIGVFVAEEDVPKLDSILTSIPTDVILRKQRLLANPSMKQAMLFPQPAQAGDAFHQILNGLAR KLPHGDNVFL…
PvGT47_12	Pavir.Ea03879.1	Chr5a	61640566-61642505	MAAAVLQCTSGSAGDVLEDDPVGRLKVYVYELPTKYNKKMVAKDSRCLSHMFAAEIFMHRFLLSSAIRTLNPEEADWFYTPVYTT CDLTPWGHPLPFKSPRIMRSAIQFISKRWPYWNRTEGADHFFVVPHDFGACFHYQEEKAIERGVLPLLRRATLVQTFGQKDHVCLKEGSITIPPYAPPQK MKTHLVPPETPRSIFVYFRGLFYDTANDPEGGYYARGARASVWENFKNNPLFDISTDHPPTYYEDMQRAVFCLCPLGWAPWSPRLVEAVVFGCIPVIIAD DIVLPFADAIPWEEIGVFVAEDDVPKLDTILTSIPMEVILRKQRLLANPSMKQAMLFPQPAQPGDAFHQILNGLARKLPHGKDVFLKPGQKVLNWTKGPR GDLKPW*
PvGT47_13	Pavir.Ea03880.1	Chr5a	61644520-61648908	MGRERRPWAAAAAAAALLLVASCVAAAPLLQQHQRGRISGDAGGVLDDNPVGKLKVFVYEMPRKYNQMLLAKDSRCLHHMFAAEI FMHQFLLSSAVRTLDPEEADWFYTPVYTTCDLTPQGFPLPFRAPRIMRSAIKYVATTWPYWNRTEGADHFFLTPHDFGACFHYQEERAMVRGILPLLRRA TLVQTFGQRNHVCLQEGSITIPPYANPHKMQAHLINPGTPRSIFVYFRGLFYDMGNDPEGSYYARGARASVWENFKDNPLFDISTEHPSTYYEDMQRAIF CLCPLGWAPWSPRLVEAVVFGCIPVIIADDIVLPFADAIPWEQISVFVAERDVPRLDSILTSIPLQDILRKQRLLAAASVKQALLFHQPARPGDAFDQIL NGLARKLPHA…
PvGT47_14	Pavir.Ea03921.1	Chr5a	61923403-61926421	KPRLPTPPPLPPSAFSRHSASRRRWRHGGAEQPRGGLGRGLPAAPRRAALHLPLPHLRRHPRRLPRRAPQPQALLRAVPARRGPA APRLHVRPAPALPRRHDGGRRPQRHCGGPFPRRPPSAGGIRRQHSVEYWMMASLQDGGGGGGAGSERREAVRVRDPDAAEAFFVPFFSSLSFNVHGRNMT DPDTEADRLLQVELMDILWKSKYWQRSAGRDHVIPMHHPNAFRFLRNLVNASILIVADFGRYTKELASLRKDVVAPYVHVVGSFIDDDPPDPFEARHTLL FFRGRTVRKDEGKIRAKLAKILKGKDGVRFENSFATGDGIKISTEGMRSSKFCLHPAGDTPSSCRLFDAIVSHCVPVIVSSRIELPFEDEIDYSEFSLFF SVEEALRPDY…
PvGT47_15	Pavir.Eb00841.1	Chr5b	12739767-12743350	MPHHATPPHPPAVRKILSRPRVVAACAAVAALALLLSAAPAAEDPSRWHSYLVGPLPGGTREETVVAAAVAGSFAVAAAAAASPS PTGAPLSSLGETNLSGEIEPTPAPSMFLVPSPSPAENFDDGSMEEPERPEIKGNPPKDPAPLLQEPISTGLPTMGSDVNEEHDMDRKPVLPLRLKQAPLW STAADEELIYAKKDITNAPLTLDDPDLYAPLFRNVSMFKRSYELMERLLKVFIYHDGAKPIFHSPELKGIYASEGWFMKLMEANQNFVVRDPNRAHLFYL PYSSRQLEHNLYVPGSNTMEPLSIFIKNYIDMISAKYPYWNRTKGADHFIVACHDWGPYTTKLHDELRKNTIKALCNADLSEGIFIRGKDVSLPETFLRA PRRPLRDIGG…
PvGT47_16	Pavir.Eb01675.1	Chr5b	32974097-32976270	MAPEEALRYAKKEIRDAEPVLDDPDLYAPLFKNVSQFKRSYELMERILKVYIYQDGRRPIFHTPPLSGIYASEGWFMKLLTESRR HVVADATRAHLFYLPYSSQQLRLTRYVPDSHDLRPLSVYLRNFVRGLAIKYPFWNRTRGADHFLVACHDWGPYTTTAHRDLRRNTIKALCNADSSEGIFT PGKDVSLPETTIRTPRRPLRYVGGLPVSRRGILAFFAGNVHGRVRPELLRHWGGRRDDEMRVYSLLPSRVSRRMSYIQHMKNSRFCLCPMGYEVNSPRIV EALYYECVPVIIADNFVLPLSEVLDWSAFSVVVAEKDIPDLKRILQGIPLRRYVRMHDCVKRLQRHFLWHARPVKYDLFHMILHSIWLSRVNQVEIEAS*
PvGT47_17	Pavir.Eb03188.1	Chr5b	65901915-65903681	MDIRLQLLPSAHPPHTACKLRTEPVFREHQLTASLIVRHDPTAMARSLLSHLLICCSIAGASDAATTATQRPADPCAGRRVHVRR LPVRFNLDLLRHCAAAFPLVDPTSPATSTPSCASLANHGLGPRTHPRSRSWYRTDGRLLEPFFHRRVLERRCLVDRPARADAVFVPYYAALDALPYALDP ALLNSSALHGLPLARFLARDDPRTLARRHGHDHFFLMAGPAWDYSQPHDADPRMYGTTSLLRRPELENFTVLTVESRAWPWQEHAVPHPTSFHPATLPRL RGWLARARRAHRTALMLYVGGVSRPSRPNIRGSILAECANATAAVCTVVDCSGGACALDPLMYMRPMLRAKFCLEPPGDTPSRRSTFDAIVAGCVPVFFE HAGARTQYGW…
PvGT47_18	Pavir.Eb03725.1	Chr5b	71905922-71908819	MGTGGAPAPALALALLLACAHVALVAAQDTERIEGSAGDVLEDDPVGRLKVYVYELPTKYNKKMVAKDSRCLSHMFAAEIFMHRF LLSSAIRTLNPEEADWFYTPVYTTCDLTPWGHPLPFKSPRIMRSAIQFISKHWPYWNRTEGADHFFVVPHDFGACFHYQEEKAIERGVLPLLRRATLVQT FGQKDHVCLKEGSITIPPYAPPQKMKTHLVPPETPRSIFVYFRGLFYDTANDPEGGYYARGARASVWENFKNNPLFDISADHPPTYYEDMQRAVFCLCPL GWAPWSPRLVEAVVFGCIPVIIADDIVLPFADAIPWEEIGVFVAEDDVPKLDTILTSIPMEVILRKQRLLANPSMKQAMLFPQPAQPGDAFHQILNGLVR KLPHGKDVFL…
PvGT47_19	Pavir.Eb03726.1	Chr5b	71909988-71913169	MRRWALAIAILAAVLFLGAEAQAVQQGHQTERISGSAGDVLEDNPVGRLKVYVYDLPSKYNKKLLKKDPRCLNHMFAAEIFMHRF LLSSAVRTFNPEEADWFYTPVYTTCDLTPSGLPLPFKSPRMMRSAIELIATNWPYWNRSEGADHFFVTPHDFGACFHYQEEKAIGRGILPLLQRATLVQT FGQKNHVCLKDGSITIPPFAPPQKMQAHLIPSDTPRSIFVYFRGLFYDTSNDPEGGYYARGARASVWENFKNNPLFDISTDHPPTYYEDMQRSVFCLCPL GWAPWSPRLVEAVVFGCIPVIIADDIVLPFADAIPWEEIGVFVAEEDVPKLDSILTSIPTDVILRKQRLLANPSMKQAMLFPQPAQPGDAFHQILNGLAR KLPHGDNVFL…
PvGT47_20	Pavir.Eb03802.1	Chr5b	73259577-73263600	MAGKQFPSLAHARPASASSRRLLAAAGALVLLSAAYFLLLSPSSPRSAATVLASPSSTTSSFLASLESFLAAPHPSDSAAAPGDL DSAIRSQEEARLLGDPAWPAPAAGPLRVYVYEMPSKFTYDLLRRFRDSYRKTENLTSNGSPVHRLIEQHSIDYWLWADLIASEPQRLLKSIVRVQRQEEA DIFYVPFFTTISYFLLEKQECKALYREALKWVTDQPAWQRSEGRDHVIPVHHPWSFKSVRRFVKKAIWLLPDMDSTGNWYKPGQVYLEKDVILPYVPNVD HCDSRCVLETQSKRSILLFFRGRLKRNAGGKIRSNLVEELKSAEDIVIEEGSAGAQGKTAAQDGMRKSLFCLSPAGDTPSSARLFDAIVSGCIPVIISDE LELPFEGILD…
PvGT47_21	Pavir.Fa00902.1	Chr6a	12981860-12984038	MVAERKMQPPPPPEHRRALRFVAFLAVSLLAFSCWALVSSRINDAVPDSAALVGDVDKMPALAGDGEEGARRPAPAASAAVPASG GAARLMSDPVIREPPVVREGGGEGERGGRCDADTAALRVYVYDLPAEFHFGMLGWDGKGEAAWPDLRDGRAAPHYPGGLNLQHSVAYWLALDILSSTTLP PGGAAGRPCIAVRVTNASLADVFFVPFFASLSYNRHSKLLRGERVSRNRALQAELVKYLARREEWRRWGGRDHLIVPHHPNSMMEARKKLSAAMFVLSDF GRYSPDVANLKKDVIAPYNHVVRSLADDESPAFDQRPVLAYFQGAIHRKAGGKVRQKLYQLLKGEPDVHFSYGSVRQNGIRRATAGMSTSKFCLNIAGDT PSSNRLFDAI…
PvGT47_22	Pavir.Ga00200.1	Chr7a	3145112-3148159	MRAGRPPPPATKIWPAAAAMKRLAVLASSILLLLLSLSFFLFRPTSRPILSSLQAFEPDRRLRVYVADLPRALNYGLLDRYWSLP AADSRIPASSDPDHPAPHNHPPYPESPLIKQYSAEYWLLASLHTAATAAVRVVADWREADVVFVPFFATLSAEMELGWGTKGAFRKKDGNEDYRRQREVV DRVTAHPAWRRSGGRDHIFVLTDPVAMWHVRTEIAPAILLVVDFGGWFKLDSKITSRNSPHMIQHTQVSLLKDVIVPYTRLLPTLLLSENKDRPTLLYFK GAKHRHRGGLVREKLWDLLGNEPDIVMEEGFPNATGRDQSIKGMRASEFCLHPAGDTPTSCRLFDAIASLCIPVIVSDEVELPFEGMIDYTEFSIFVSVS NAMKPKWLTN…
PvGT47_23	Pavir.Gb00296.1	Chr7b	3622389-3629043	GNEDYRRQREVVDRVTAHPAWRRSGGRDHIFVLTDPVAMWHVRTEIAPAILLVVDFGGWFKLDSKITSRNSSHMIQHTQVSLLKD VIVPYTHLLPTLLLSENKDRPTLLYFKGAKHRHRGGLVREKLWDLLGNEPDIVMEEGFPNATGRDQSIKGMRASEFCLHPAGDTPTSCRLFDAIASLCIP VIVSDEVELPFEGMIYYTEFS
PvGT47_24	Pavir.Gb01738.1	Chr7b	22883090-22885616	MGSGTGWLPVALLLLAACVLSPRVAAAAAGEAEHAVQQHSERISGSAGDVLEDNPVGRLKVFIYDLPRKYNKKMVTKDPRCLNHM FAAEIFMHRFLLSSAVRTLNPKEADWFYTPVYTTCDLTNAGLPLPFKSPRVMRSAIQYISNKWPFWNRTDGADHFFVVPHDFAACFHYQEEKAIERGILP LLRRATLVQTFGQENHVCLKEGSIIIPPYAPPQKMQAHLISPDTPRSIFVYFRGLFYDTGNDPEGGYYARGARASLWENFKSNPLFDISTDHPATYYEDM QRAVFCLCPLGWAPWSPRLVEAVVFGCIPVIIADDIVLPFADAIPWEEIGVFVEEKDVPKLDTILTSMPIDDILRKQRLLANPSMKQAMLFPQPAQPRDA FHQILNGLAR…
PvGT47_25	Pavir.Ia00324.1	Chr9a	3205720-3206880	MERVGAHGGKRWLPRLLLLAALSWLLMVYLHAAVFHAPAVSAPPHTSLVAVASDREDGRRFLLRQEEQLKKIASASASASASALP VAAGEERRRPRGVGGGDACRGRYVYIHDLPPRFNADIIRNCRKTEDHWADMCRFLRNDGLGRPLADRIDGVIKSEAGWYDTHQFALDAIFHNRMKQYECL TSDSAEASAVFVPFYAGFDFVRYHWGYDNATRDAASVDLTEWLMARPEWRRMGGRDHFLVAGRTGWDFRRSNNVDPDWGNDLLVMPAGQNMSVLVLESAM LHGSDYPVPYPTYFHPRSDADVLRWQDRVRGQRRTWLMAFVGAPRPDVPINIRVRDHVIAQCKASSACTMLGCARATGSTQCHTPGNIMRLFQKTVFCLQ PP
PvGT47_26	Pavir.Ia02168.1	Chr9a	33590149-33595136	MGVGTPLPLANFTFLTLESRIWPWQEHAIPHLTSFHPASLPHLRAWLARARRSGRGTLMLFAGGVSRPSRPNIRGSILAECANRT DACAVVDCSGGKCSHDPGRYMRAMLKAKFCLEPPGDTPTRRSTFDAILAGCVPVFFEDLAARSQYGWHLPPAQYDEFSVHIPKETVVFGGVSIAETLEAV PEGEVRRMRKRVLEMAPRVVYRRHGSTDELKGVVKDAVDLAVDGVLRRIRRRTRAQEGLPDRIYAMEDDSIEM*
PvGT47_27	Pavir.Ia03223.1	Chr9a	65164143-65165821	MQLSVGVANFIAQLLSKSAAKGGGAQWRRAGGAKGAEKAAANALPPLQLLAILAVIAWTLFLYVQFSVLSAAVEVVDVSDGADSA DPCRGRYVYVHDLPPRFNADIIRDCRKYEDHWGDMCGVISNAGLGRPLVDRADGVITSEAGWYGTHQFALDAIFHNRMKQYKCLTNHSAMANAVFVPFYA GFDFARYHWGYDNATRDATFVDLAQWLMARPQWRQMWGRDHFLVAGRTGCDFRRSNNVDPDWGNDLLAMPAGRNMSVLVLESTLLHGSDYSVPYPTYFHP RSDADVLRWQDQVRGQRRAWLMAFVGAPRPDTPVNIRVRDHVIAQCKASSACAMLGCARSPGSPQCHAPGDIMRLFQKTSFCLQPPGDSCTRRSVFDSMV AVCIPVFFHT…
PvGT47_28	Pavir.Ia03224.1	Chr9a	65168395-65170172	MAAPTTRAGAGTSSCTTCLHTSTPTSSATATRLETTGGGLCASLGNAGLGPPLDDRTDGV FTGEGGWYGTNQFALDVIFHNRMKQYECLTNRSVMAAAIFVPFYAGFDFARHHGSAATSK ELMVWVTGQPQWAWRMWGRDHFLVAGRTGSDFRRSSNVGPGRGNDLLGMPAARNMSVLVL ESTLQHGSDYSVPYPTYFHPRSDAGVLRWQDRVQGQRRTWLMAFVGATRRDTPVSTQVRD HVIAQCKASNACAMLGCARSPGAGSAQCHTHTPATIMRLLQKASFCLQPPGDSWTRRSVF DAMVAGCIPVFFHTASAYKQYRWHLPKDHLSYSVYIPDTDVQQRNVSIEAVLRSIPPAMV VRLREEVIKLIPTVIYADPRSRLETIKDAFDVA…
PvGT47_29	Pavir.Ia03787.1	Chr9a	72211312-72213635	MAAAGAAPCRSPLAWLFALAAALFFASWYLLLDSAAAARAYQGLRLGAGGRLPGLGTKCDPARALLRVYMYDLPPEFHFGLLDWK PPGFGGGVWPDVRGAVPEYPGGLNLQHSIEYWLTLDLLASEQGAPTPCAAVRVRRHADADVVFVPFFASLSFNRHSRVVPPARDSEDRALQRRLLEFLAA RPEWRRTGGRDHVVLAHHPNGMLDARYRLWPCVFVLCDFGRYPPSVANLDKDVIAPYRHVVDNFANDTAGYDDRPTLLYFQGAIYRKDGGSIRQELYYLL KDEKDVHFSFGSVAGNGIEQATQGMRASKFCLNIAGDTPSSNRLFDSIVSHCVPVIISDEIELPFEDVLVYSKFSIIVRGADAVKKGFLMNLIRGISREE WTLMWNWLKE…
PvGT47_30	Pavir.Ia04340.1	Chr9a	80404465-80408842	MLAIRSTKCPVAFVGAASALVVLVTAVHVFMVPILPSSLDYFRARSSVSDPRNASLGVEVVDSRLREHFPSDSHGAVVFRGAPWK AEIGRWLAGCHANSSSVNITEGIGAKRCEKDCSGRGVCNYDLGECRCFHGYSGKGCEEVLKLECNLPSSPEWPAGRWIVSMCAAHCDTTRAMCFCGPETK YPDRPVAEACGFKTILPARPDDPKLTDWKTPDLENVFTTNRSKSGWCNVVPEDAYSSKVKYKEECDCKYDGLWGQFCETHVECSCINQCSGHGHCRGGFC QCDSGYFGIDCSIPSAYSLAYDWPSWLQPRVNLPDMKILSSTPINVKAIVQKKRPLIYVYDLPAEFDSHLLEGRHFKFQCVNRIYDDRNRTLWTQQLYGA QMALYESILA…
PvGT47_31	Pavir.Ia04741.1	Chr9a	84388098-84389918	MKRHNAGELPLSSAPAPAGDGIERVAEDKMDKYDKGRIRCSRLCFLFALAATVSILARHCYDARGGNAGVVRIEAVRAPPPPSVH HERKIVPIARRESLASDRSPSAPADAVDGASWKPSASESAQPADNGDKTPTKEKGSPSASHGSKYGGHPFARALAAADNKDDLCGGQYIYVQHLPARFNK DMVHNCDRLSPWTDMCRCTTNGGFGPLLRGGKGALQGAGTGWYDTDEHALDIIFHERIKRYECLTDDPSLAAAVFVPFYAGLDVARHLWGNNVSARDELA LDLAGLLAERPEWCAMGGRDHFFVAGRTTWDFRRKADGGQSEWGSKLLNLPAARNMTALVVEASPWHLNDVAVPYPTAFHPASDEDLFFWQDRVRALNRT YLFSFAGIAR…
PvGT47_32	Pavir.Ia04742.1	Chr9a	84391564-84395592	MVAAHPRGVAAWVSGRRWRGGARAGTDDDGEWGTRLLRLPAVRNMTALVLELDPWDRPATIAVPYPTYFHPATAADVRAWQGKAR AAERRWLFSFAGAARPGSNRTVRAEIFQQCGASSRCGMFRCAKASECESESSPGAVMRLFESSSFCLQPRGDTATRRSTFDAVLAGCIPVFFHPDSAYTQ YTAHLPPDPASWSVLITHADVTDRNVSIEETLARIPPETVRSMREEVIRLIPRVVYADPRSARVDFKDTFDIAVEAVLDRVAKRRRGDVVDVEGH*
PvGT47_33	Pavir.Ia04875.1	Chr9a	86471522-86474172	MRDPKPRRSPAAPTLASSGRLRKHSTWLLLLLLWFALSVYLFISSTPPAAAPLRRSAFLRSKARALSATTATPVRIYVYDLPARF NRDWVSADARCARHLFAAEVAVHEALLAYAGRAPRPEDADLFFVPVYVSCNFSTPNGFPSLSHARGLLAEAVHLLRTQMPYWNRSAGADHVFVASHDFGA CFHPMEDVAIADGIPEFLKRSILLQTFGVQGHHVCQEVEHVVIPPHVPPEVAHELPEPEKVRRDIFAFFRGKMEVHPKNISGRFYSKKVRTELLQHYGRN RKFYLKRKRFDNYQSEMARSLFCLCPLGWAPWSPRLVESVLLGCIPVIIADNIRLPFPSVLRWPEISLQVAEKDIASLEMVLDQVVATNLTRIQRNLWDP MKRKALVFNR…
PvGT47_34	Pavir.Ib00265.1	Chr9b	2900330-2902448	MQLSVANFIVQLLSKSTAKGGGARWRRAVGAKGAEKAAANALPPLQLLAILAVIAWTLFLYVQLSVLSAAVEVVEVSDGADSADP CRGRYVYVHDLPPRFNADIIRDCRKYQDHWGDMCGVVSNAGLGRPLADGVFTGEAGWYGTHQFALDAIFHSRMKQYECLTNHSAVANAVFVPFYAGFDFA RYHWGYDNATRDAAFVDLAHWLMARPQWRRMWGRDHFLVAGRTGWDFRRSNNVDPDWGNDLLAMPAGRNMSVLVLETTLLHGSDYSVPYPTYFHPRSDAD VLRWQDRVRGQRRAWLMAFVGAPRPDTPVNIRVRDHVIAQCKASSACAMLGCARSPGSPQCHAPGDIMRLFQKASFCLQPPGDSCTRRSVFDSMVAGCIP VFFHTASAYK…
PvGT47_35	Pavir.Ib00518.1	Chr9b	5425569-5430766	MLAIRSTKCSVAFVGAAGALVVLVTAVHVFMVPILPSSLDYFGARGSVGHPRNATPGVGVVDSRLRGHFPSDSHGAVAFRGAPWK AEVGRWLAGCHANSSSVNITERIGAKRCEKDCSGRGVCNYDLGECRCFHGYSGKGCEEVLKLECNLPSSPEWPAGRWIVSMCAAHCDTTRAMCFCGPGTK YPDRPVAEACGFKTILPAKPDDPKLTDWKTPDLENVFTTNGSKSGWCNVVPEDAYSSKVKYKEECDCKYDGLWGQFCETHVECSCINQCSGHGHCHDGFC QCDSGYFGIDCSIPSAYSLAYDWPSWLQPPVNLPDMKILSSTPINVKAIVQKKRPLIYVYDLPAELDSHLLEGRHFKFQCVNRIYDDRNRTLWTQQLYGA QMALYESILA…
PvGT47_36	Pavir.Ib00605.1	Chr9b	6473123-6475947	MRGDPKPPPRRSPAAPTLAGRLRKHSTSLLLLLLWFALSLYLFISPTPPAAAPLRRSAFLRSKARALSATTAGAPPVRIYVYDLP ARFNRDWVAADARCARHLFAAEVAVHEALLAYAGRAARPDDADLFFVPVYVSCNFSTPNGFPSLSHARGLLADAVHLLRTQMPYWNRSAGADHIFVASHD FGACFHPMEDVAIADGIPEFLKRSILLQTFGVQGHHVCQEVEHVVIPPHVPPEVSHELPEPEKVRRDIFAFFRGKMEVHPKNISGRFYSKKVRTELLQHY GRNRKFYLKRKRFDNYQSEMARSLFCLCPLGWAPWSPRLVESVLLGCIPVIIADNIRLPFPSVLRWPEISLQVAEKDIASLETVLDHVVATNLTRIQKNL WDPMKRKALV…
PvGT47_37	Pavir.Ib00839.1	Chr9b	8644520-8646411	MPPAAAAMSKSGAVSRPCFFLVAAAALWVLTLYLRLLAVMSVPGAFTGRAASLVAAEGNGSGSGGDPCRGRYVYIHDLPPRFNAD ILRGCAAASDRWAGMCEDVGNAGLGRPLSGGALTGETGWYATHQFALDAIFHARVRQYGCLTNDSSAAAAVFVPFYAGFEFARHVWGYDNAARDAAARDL ARWLARRPEWRRAGGRDHFLVAGRTGWDFRRDAYPNATWGTNLFLLPAVKNMTFLVVETATMGWGNDLAVPYPTYFHPRTDSDVLNWQHRIRNADRWWFM SFVGAARPDDPRSIRSQVMDQCRASPACRQLGCASGTAQCHYPGDIMVLFQSSTFCLQPPGDSASRRSTFDAMVAGCIPVFFQPRSAYLQYRWHLPKDHA TYSVFIPAES…
PvGT47_38	Pavir.Ib00844.1	Chr9b	8705029-8706870	MKRHNAGELPLSSAPAPAGDGIKRVTEKEEAEDKMDKYDKGRIRCSRLCFLFALAATVTILARHCYEAGLGRGGNAGVVRIEAAH GPPPSLHRDRKIAPIARREPPVSDRSPSAPADAVDDASWKASASESAQPDDGDKKPTKEKGSSPSASHGNKYGGHPFARALAAADNKDDLCGGQYIYVQE LPARFNKDMVQKCDSLSPWTDMCRYTTNGGFGPLLRGGKGAFQGTGTGWYDTDEPALDIIFHERVKRYECLTDDPSLAAAVFVPFYAGLDVARHLWGTNV SARDELALDLAGLLAARPEWRAMGGRDHFFVAGRATWDFRREAGGQSGWGSKLLNLPAARNMTALVVEASPWHLNDVAVPYPTAFHPASDEDLFFWQDRV RALNRTYLFS…
PvGT47_39	Pavir.Ib00847.1	Chr9b	8724503-8726056	MKLTSSEVNLQKGAEDAAADKHGGGGGVLRPSRICHLALLSTAFWAFVFFLHSGTQGDGVGVASVLFKQAAFSLPPLLSANAAGR GRAPPAQPPPPSTHAVQAQSSPPPPAADRCAGRYIYMYDLPPRFNDDLIRDCKKLWRFYDMCPHVANCGMGRALGDEGGVFSPRGWYATNQFTLDLIFHA RMKRYECLTGDPSLAAALYVPFYASLDGGRHMWNRTSLRDMLGLDLVAWLARRPQWRAMGGRDHFMVAGRTAWDFRRYEDVDEQWGTKLLHNPAVQNMTV LVLETSPWRRDNLAVPYPTYFHPEAAADVAAWQEKVRAAERPWLFAFAGAPHPWQRETVRPEIFRQCGASRRCRLFRCGGAKSGPRSCKSPGAVMRVFES SDFCLQPRGD…
PvGT47_40	Pavir.Ib01515.1	Chr9b	16606248-16608575	MAAAAASCRSPLAWLFALAAALFFASWYLLLDSAAGPAAAYQGLRLAAGARGRLPGPGTKCDPARALLRVYMYDLPPEFHFGLLD GAPPGFGGGVWPDVRATVPEYPGGLNLQHSVEYWLTLDLLASEQGAPTPCAAVRVRRHADADVVLVPFFASLSFNRHSRVVPPARGSEDRALQRRLLQFL AARPEWRRTGGRDHVVLAHHPNGMLDARYRLWPCVFVLCDFGRYPPSVANLDKDVIAPYRHLVDNFANDTAGYHDRPTLLYFQGAIYRKDGGSIRQELYY LLKDEKDVHFSFGSVAGNGIEQATQGMRASKFCLNIAGDTPSSNRLFDSIVSHCVPVIISDEIELPFEDVLVYSKFSVIVRGADAVKKGFLMNLIRGVSR EEWTLMWNRL…
PvGT47_41	Pavir.J00401.1	unknown	contig00362:27816-30965	MRPVLAIAILATTAAAVLFLGSEAQEVKQDHHTERISGSAGDVLEDDAVGRLKVYVYDLPARYNTALLEKDPRCLTHMFATEVFVH RSLLSSAVRTLDPEEADWFFVPVYTTCDLTASGHPMPFDSPRMMRSAIRLVAERWPHWNRSEGADHFLVTPHDFGACFHFKEDKAVARGILPLLRRATLV QTFGQRRHACLKGGSITVPPYAPPARMEARRLPPGTPRSVFVYFRGLFYDAGNDPEGGHYARGARASVWENFRSNPLFDISTERPATYYEDMQRAVFCLC PLGWAPWSPRLVEAVVFGCIPVVIADDIVLPFADAIPWADIGVFVAEEDVPRLDTILTSIPAEVVLRKQRLLATPAMKRAVLFSQPSQPGDAFHQILNGL ARKLPHGDG…
PvGT47_42	Pavir.J02672.1	unknown	contig03176:551-4557	MPKLVGLGTHPLSSLLSICPTKISPLLSSSIPLPPLCRVPQIQSPREALLPSPLEVETGAGVPSGMGSGAGWLPVALLLLAASVLS PRVAAAAAAAGGEAEHAVQQHSERISGSAGDVLEDNPVGRLKVFIYDLPRKYNKKMVTKDPRCLNHMFAAEIFMHRFLLSSAVRTLNPKEADWFYTPVYT TCDLTNAGLPLPFKSPRVMRSAIQYISNKWPFWNRTDGADHFFVVPHDFAACFHYQEEKAIERGILPLLRRATLVQTFGQENHVCLKEGSIIIPPYAPPQ KMQAHLISPDTPRSIFVYFRGLFYDTGNDPEGGYYARGARASLWENFKSNPLFDISTDHPATYYEDMQRAVFCLCPLGWAPWSPRLVEAVVFGCIPVIIA DDIVLPFAD…
PvGT47_43	Pavir.J02784.1	unknown	contig03358:15868-19228	MRHHHGCSRAHQVGALLLVAATFLLTRLFDRLFLDASSPSSPSFPLSAARPASPSADLRIYVYSEDEIQGLRTLLRGRDGTVAAAT CLKGQWGTQVKIHQFLLKSRFRTFNKDQANLFFVPSYVKCVRMTGALNDKEINQTYVKILSQMPYFRRSGGRDHIFVFPSGAGAHLFRSWATFLNRSIIL TPEGDRTDKRGTSAFNTWKDIIIPGNVDDSMVKSDARAVQPIPLRKRKYLANFLGRAQGKAGRLQLVKLAKQYPDKLESPELKLSGPNKLGRMDYFKHLR NAKFCLAPRGESSWTLRFYESFFVECVPVILSDEVELPFQNVIDYSEISIKWPSSRIGELFEYLESIPDERIEEMIGRGREIRCLWVYAADTEPCSAMSG ILSELQRKV…
PvGT47_44	Pavir.J03055.1	unknown	contig03769:3851-6679	MGKGSGRGLALALAVLLACSGVVVVTAQDTERIEGSAGDVLEDNPVGRLKVFVYDLPSKYNKKLLKKDPRCLNHMFAAEIFMHWFL LSSAVRTFNPEEADWFYTPVYTTCDLTPSGLPLPFKSPRMMRSAIQLIATNWPYWNRSEGADHFFVTPHDFGACFHYQEEKAIARGILPLLQRATLVQTF GQKNHVCLKDGSITIPPFAPPQKMQTHLIPPDTPRSIFVYFRGLFYDNGNDPEGGYYARGARASVWENFKNNPLFDISTDHPPTYYEDMQRSVFCLCPLG WAPWSPRLVEAVVFGCIPVIIADDIVLPFADAIPWEEIGVFVAEEDVPRLDSILTSIPTDVILRKQRLLANPSMKQAMLFPQPAQPGDAFHQILNGLARK LPHGDNVFL…
PvGT47_45	Pavir.J03056.1	unknown	contig03769:8459-11351	MGTGRARALPLALALLLACSDVAVVAAQGTERIQGSAGDVLEDDPVGRLKVYVYELPPKYNKNILAKDSRCLKHMFATEIFIHRFL LSSAVQTLNPEEADWFYTPVYTTCDLTPWGHPLTTKSPRMMRSAIQYISKRWPYWNRTEGADHFFVTPHDFGACFYFQEAKAIERGVLPVLCRATLVQTF GQKHHACLKEGSITIPPYTPPHKMRTHLVPPETPRSIFVYFRGLFYDTSNDPEGGYYARGARASVWENFKSNPMFDISTDHPPTYYEDMQRSVFCLCPLG WAPWSPRLVEAVVFGCIPVIIADDIVLPFADAIPWEEIGVFVAEDDVTKLDTILTSIPMEEILRKQRLLANPSMKQAMLFPQPAEPRDAFHQILNGLARK LPHGKGVFL…
PvGT47_46	Pavir.J05682.1	unknown	contig09012:9485-13384	MGRERRPWPAAAAAVLLLVASCVAAAPLQQHQRARITGDAGGVLDDNPVGKLKVFVYEMPRKYNQMLLSKDSRCLHHMFAAEIFTH QFLLSSAVRTLDPEEADWFYTPVYTTCDLTPQGFPLPFRAPRIMRSAVKYVATTWPYWNRTEGADHFFLTPHDFGACFHYQEERAMERGILPLLRRATLV QTFGQRNHVCLQEGSITIPPYANPHKMQAHLINPGTPRSIFVYFRGLFYDMGNDPEGGYYARGARASVWENFKDNPLFDISTEHPSTYYEDMQRAIFCLC PLGWAPWSPRLVEAVVFGCIPVIIADDIVLPFADAIPWEQISVFVAERDVPRLDSILTSIPLQDILRKQRLLAGASVKQALLFHQPARPGDAFDQILNGL ARKLPHGKG…
PvGT47_47	Pavir.J09543.1	unknown	contig12484:10055-11575	MENGGGRVAATAVPLVAFALLAAAFFVLPGPAAFLGGESPASRERRSEHFLRHVPHEPQPQKAAARVPASTPPAAGEVSVRPIEEG LARSRAAIRRAAREAPAAAAESARRSFKDVGDAFVPRGAIYRNPRAFHRSYLEMERKFKIWAYREGEPPLVHLGPGADIYSIEGQFLEEMEDPRNPFAAR DPGEAHAFLLPISVCNLVHYVYRLNTTARVEPMRRMLSDYIDVVAGKYPYWNRSRGADHVIVSCHDWGPLVSEGNRELYANAIRVLCNANTSEGFRPRKD ATLPEVNLADGILRRPTFGLPPENRTTLAFFAGGMHGHIRKALLGYWLGRQDPAGMDVHEYLPAGQDYHALMARARFCLCPSGFEVASPRVVESVFAGCV PVIISDGYP…
PvGT47_48	Pavir.J15548.1	unknown	contig17434:1475-4737	MNMRQVFAIAILAATAAAVLFLGSEAQEVKQDHHTERISGSAGNVLEDDPVGRLKVYVYDLPARYNTALLEKDPRCLTHMFAAEVF VHRSLLSSAVRTLDPEEADWFFVPVYTTCDLTSSGHPMPFDSPRMMRGAIRLVAERWPHWNRSEGADHFFVTPHDFGACFHFKEEKAVARGILPLLRRAT LVQTFGQRRHACLKGGSITVPPYAPPARMEARRLPPGTPRSVFAYFRGLFYDAGNDPEGGRYARGARASVWENFRSSPVFDISAERPATYYEDMQRAVFC LCPLGWAPWSPRLVEAVVFGCIPVVIADGIVLPFADAIPWADVGVFVAEEDVPRLDTILTSIPPEVVLRKQRLLASPAVKRAVLFPQPAQPGDAFHQILN GLARKLPHG…
PvGT47_49	Pavir.J20381.1	unknown	contig22150:2513-5175	MARTLLLPLAATTVLVASTIFLFAAAGARWRPADTGLLVPPRAVSVPVTASASSNTTGARKELSFLDENGGPDDPGSGAARCDPRA AAVRVFMYDLPPEFHFGLLGWSPPSPGSVWPDLTNDAAAPPPRYPGGLNQQHSVAYWLTLDLLSSSSAPCGAAVRVADPRDADLVFVPFFASLSYNRHSR PVPPEKVSRDKALQEKLVMYLSARLEWKRYGGADHVIVAHHPNSLLHARAVLSPAVFVLSDFGRYHPRVASLEKDVIAPYKHMAKTFVNDSAGFDHRPTL LYFRGAIYRKEGGSIRQELYYMLKDEKDVYFSFGSVQDHGASKASQGMHSSKFCLNIAGDTPSSNRLFDAIVSHCVPVIISDDIELPYEDVLDYSKFSIF VRSSDAVKK…
PvGT47_50	Pavir.J31504.1	unknown	contig37323:3490-6711	MAGRVPGAAASSPLPRALLLLAALALFTLSFLSLRSLRPAAGPSLPTAGVTSSLGAADKPRPILPLQHSSSAYHSPEAFAAGYAEM ERSFKVYIYPDGDPKTFYQTPRKLTGKYASEGYFFQNIRESRFRTDDPDKAHLFFVPISPHKMRGKGTSYENMTVIVKDYVEGLINKYPYWNRTLGADHF FVTCHDVGVRAFEGLPFMVKNSIRVVCSPSYNVDFIPHKDIALPQVLQPFALPEGGNDIENRTILGFWAGHRNSKIRVILARVWENDTELAISNNRISRA IGELVYQKQFYLTKFCICPGGSQVNSARISDSIHYGCVPVILSDYYDLPFNDALDWRKFAVILRERDVYQLKSILKSISQEEFASLHKSLVQVQKHFVWH SPPVPYDAF…
PvGT47_51	Pavir.J32963.1	unknown	contig39963:2556-5755	MTGPRAAVLLAVASLSCLLSSPVVSAASGAEVAGGAARRKIERIAGSAGDVLEDNPVGRLKVFVYDLPSKYNKRIVTKDPRCLNHM FAAEIFMHRFLLSSAVRTLNPEEADWFYVPVYTTCDLTPAGLPLPFKSPRMMRSAIQFISNKWPFWNKTDGADHFFVVPHDFGACFHYQEEKAIERGILP MLRRATLVQTFGQKNHVCLKEGSIIIPPYAPPQKMQAHLIPPDTPRSIFVYFRGLFYDNGNDPEGGYYARGARASLWENFKNNPLFDISTDHPSTYYEDM QRAVFCLCPLGWAPWSPRLVEAVVLGCIPVIIADDIVLPFADAIPWEEIGVFVDEEDVPKLDSILTSIPIEEILRKQSLLANPSMKKAMLFPQPAQPRDA FHQILNGLA…
PvGT47_52	Pavir.J33694.1	unknown	contig42424:8-4103	MATAEFMDEEVDGARCHRRRVAVIHCGLLLGLACHRRAHASSGETAFATTTGAPTMAASS TTTSIGRNSVAYRPLFMQQFGEFFSTVIVLFLFLVVRRRLERAFRRLRELFSQWRVESKV HDNVLEVKVELMDILWKSKYWQRSAGRDHVIPMHHPNAFRFLREMVNASILIVADFGRYT KELALLRKDVVAPYVHVVGSFIDDDPPDPFEARHTLLFFRGRTVRKDEGKIRAKLAKILK GKDGVRFENSLATGGGIKISTEGMQSSKFCLHPAGDTPSSCRLFDAIVSHCVPVIVSSRI ELPFEDEIDYSEFSLFFSVEEALRPDYLLNQLRQISKKKWVEMWLKLKNVSHHYEFQYPP RTGDAVNMIWRQDKYIFP*
PvGT47_53	Pavir.J35354.1	unknown	contig52761:4528-5525	PLGRHGRRRRPDRVPPARRRRRARVAAARRAAPAAHALRLAGAPRSAIRGDFRALLLGEC QAAGPAACGALDCAEGRCIRNNALVMELFMGARFCLQPRGDSFTRRSLFDCMVAGAVPVL FWRRSAYRQYGWYLPVGDGREAEWSVFIDREKLRAGNLTVRGVLAAIPEPRVRLMRERVV EMIPRLVYAAADDGGKGLGGGMDDAVDVMVDGMLRRVAEQRPRSLGAGRLAADGRRRRPD RVPPARRRRRARVAAARRAAPAAHALRLAGAPRSAIRGDFRALLLGECQAAGPAACGALD CAEGRCIRNNALVMELFMGARFCLQPRGDSFTRRSLFDCMVAGAVPVLFWRRSAYRQYGW YLPVGDGREAEWSVFIDREKLRAGNLTVRGVLA…
PvGT47_54	Pavir.J38297.1	unknown	contig74804:2585-4498	CRAAALAFLLAAGAATALLTFSLPSSPGASATTRTDFTGQLSVANQPPHLSAPRAPAAPPSPPPPPPAVRRRRREPSYWRMAPEEA LRYAKKEIRDAETVLDDPDLYAPLFKNVSQFKSRRHVVADAAKAHLFYLPYSSQQLRLTRYVPGSHDLRPLSVYLRNFVRGLAVKYPFWNRTRGADHFLV ACHDWGPYTTTAHRDLRNNTIKALCNADSSEGIFTPGRDVSLPETTIRTPRRPLRYVGGLPVSRRGILAFFAGNVHGRVRPELLRHWGGGRDEEMRVYGP LPDRVSRRMSYIQHMKNSRFCLCPMGYEVNSPRIVEAFYYECVPVIIADNFVLPLSEVLDWSAFSVVVAERDIPDLKRILQGIPLRRYVRMHACVKRLQR HFLWHARPV…
PvGT47_55	Pavir.J38799.1	unknown	contig78828:209-2712	MWERGRPPRKPRPSPIIVPPPPPSPPPRLNLLLPRSLLALAARAMPSRRPSPVLLLLLALALALLFLLLSPSSPSASRLSRSLASG YASASSSPASPAAPPAPVKIYMYDLPPKFTYGVVRSYTAARAPSGSADAAAVLPDEQLRYPGHQHLAEWWLFKDLLRRRPRDRPVARVDDPRDADLFYVP FFSSLSLVVNPIRPPAAANASGVAAAYSDEAMQDELLEWLERQPYWRRHWGRDHVFICQDPNALYRVIDWISNAILLVSDFGRLRTDQASLVKDVILPYS HRINSFKGDVGIDGRPSLLFFMGNRYRKEGGKVRDALFQILENEEDVTIKHGAQSRESRRAATRGMHSSKFCLHPAGDTPSACRLFDALVSLCVPVIVSD YIELPFEDV…
PvGT47_56	Pavir.J39813.1	unknown	contig87389:1-822	MATYRPEHPNPAARRPRPVVLLMLAFFALQLLIFLSFRAVRPPPAPASSSAAAAADTASVPARRDGNDSSCGGGLVYVYDLPAAFN EDLLRMCDKLAPMYSLCPYLANDGLGLPAGGTNLSSLLPRELLGSWYASDQFALEHIVHRRLLSHRCRTADPARSAAFFVPFYAGLAVGRHLWAANATGA DRDRDCAALLSWLHAQPWYRRSRGWDHFIALGRITWDFRRTSDDAWGGSFLTMPGVANITRLVIERDPWDDMDVGVPYPTGFHPRAAA
PvGT47_57	Pavir.J06192.1	unknown	contig101078:1-3564	SRPRVVAACAAVAALVLLLSAAPAAEDPSRWHSYLVGPLPGGTREETVVAVVGSFAGAAAASPSAAGAPLSSLGESNLSGEIEPTP APSMVLVPAPSPAENFDDGSMEEPERPEIKGNPPKDPAPLLQEPISTGLPTMSSDVNGEHDMDRKPVLPLRLEAPLWSTAADKELIYAKKDITNAPLTLD DPDLYAPLFRNVSMFKRSYELMERLLKVFIYHDGAKPIFHSPELKGIYASEGWFMKLMEANQNFVVRDPNRAHLFYLPYSSRQLEHNLYVPGSNSIEPLS IFIKNYIDMISAKYPYWNRTKGADHFFVACHDWGPYTTKLHDELRKNTIKALCNADLSEGIFIRGKDVSLPETFLRAPRRPLRDIGGRPVAQRTILAFFA GQMHGRVRP…
PvGT47_58	Pavir.J07321.1	unknown	contig108765:1125-2630	MEKTGAHGGKRWLPRLLLLAAMSWLLMVYFHLAVFGTPPVSAPHASLVAVPSDGDDGQRFRLRQQEQLKKIGSASVGALPAVAERR PRGGGDEASCRGRYVYIHDLPPRFNADILGNCHNWYPWHNMCGYLENGGLGEPVDNADGVFADQGWYATDHFGLDTIFHRRMKQYDCLTDDSSRAAAVFV PFYAGFDIVQHLWGVNSTAREKDALSLDLVDWLTRRPEWRAMGGRDHFFLSGRTAYDHQRQTDSDSEWGNKLLPLPAVQNMTVLFVEKLPWTSFDFAIPY PTYFHPGKDAQILEWQRRMRAMKREWLFSFAGGARNDPYSIRHHLIRQCGSSSFCKLVQCRKNERNCLIPSTFMRVFQGTRFCLQPTGDTMTRRSAFDAI MAGCVPVFF…
PvGT47_59	Pavir.J07412.1	unknown	contig109387:437-2971	MRRRPVLPSHHDDMDKGGGKPASSRLCFLATLCAMFWVLIFYFHFAVVSNEPDASAAQAGGVRIARARLQLPEPDGAVRHDMPLVP PARASEPPPSVARPKEVVVEEKPAAGARQEEAQPKVAAPYPFERALKTAENKSDPCGGRYIYVHELPPRFNEDMLRDCEKLSVWTNMCRFMSNDGLGPPL SDEEGVFSSTGWYGTNQFSVDVIFGNRMKQYECLTNDSSIAAAVFVPFYAGFDIARYLWGYNISTRDAASLDLVDWLMKKPEWNVMGGRDHFLVAGRITW DFRRLTEEESDWGSKLLFLPAAKNMSMLVVESSPWNSNDFGIPYPTYFHPAKDADVFLWQDRMRSLERPWLFSFAGAPRPGDPMSIRGQLIDQCRSSSVC KLLECDLGE…
PvGT47_60	Pavir.J10429.1	unknown	contig131613:1-969	MGSGRAPAAALRAARWLLPLAVPACCVVWMLLAFAPPTPPALAVRRREGSQVSGWRIVGTMPGHEDIVHASPRPPERQETIDTAPA PPESRAAADTSPPPPPERELIVDASPPPPPKLDEITGASSPPPNHQARIGIPPSPPPPQVARQERQSRAATRAAVADRCAGRYIYVQELPNRFNTDLLRG CRSLSEWTDMCKHVANAGMGPRLTRTGGVLPPTGWYDTNQFTLEVVFHNRMRQYVCLTADASRAAAVYVPYYAGLDVGRHLWGFSNDVRDALAEDLVEWL RSTPAWAAHGGRDHFLVGGRIAWDFRRQDGGEWGSRL
PvGT47_61	Pavir.J11117.1	unknown	contig136979:552-2994	MRRRSVLPSHHDDMEKGGGKPASSRLCFLATLCAMFWVLIFYFHFAVVSNEPDAQAGGVRIARARLQLPEPDGAARHDMPLEPPAR ASERPPPVTRPKEEEEEEEEKEENPAAAARQEEAPPKVAASYPFERALKTAENKSDPCGGRYIYVHELPPRFNEDMLRDCEKLSVWTNMCRFMNNDGLGP PLSDEEGVFSSTGWYGTNQFSVDVIFGNRMKQYECLTKDSSIAAAVFVPFYAGFDIARYLWGHNISTRDAASLDLVDWLMKKPEWNVMGGRDHFLVAGRI TWDFRRLTEEESDWGSKLLFLPAAKNMSMLVVESSPWNSNDFGIPYPTYFHPAKDADVFLWQDRMRSLERPWLFSFAGAPRPGDPMSIREQLIDQCRSSS VCKLLECDL…
PvGT47_62	Pavir.J11876.1	unknown	contig142694:357-2186	MQPLPPPEHRRALRFVAFLAVSLLAFSCWALVSSRINDAVPDSAALVGDVDKMPALAGEEGARRPTPPASASVPASGGAVKLMSDP VIREPQVRGGGWEGELSWRCDADTAALRVYVYDLPAEFHFGMLGWDGKGEAAWPDVRAAPHYPGGLNLQHSVAYWLALDILSSTLPPGGGGAARGGRPCV AVRVTNASLADVFFVPFFASLSYNRHSKLRRGERVSRNRALQAELVKYLARREEWRRWGGKDHLIVPHHPNSMMEARKKLSAAMFVLSDFGRYSPDVANL KKDVIAPYNHVVRSLGDDESPAFDQRPVLAYFQGAIHRKAGGKVRQKLYQLLKGERDVHFTYGSVRQNGIRRATAGMSTSKFCLNIAGDTPSSNRLFDAI VSHCVPVII…
PvGT47_63	Pavir.J16197.1	unknown	contig18028:5615-7812	MPESPASPAQPPSQPGSPLDGAAPSPVPALLRGSVLLLAFLVLELVLFWSLLDSPVSFRFLPAPGRRNTTWPNGAVDAGACEAGLV YVYDLPPEFNHDLVDDCESLWPWYSFCPYLTNGGFGEAAATLPVFFNVTRNVSLHSWYNTDQFQLEVIIHRRLLSHQCRTTDPSQASAFYVPFYVGLDVG SHLWGDNSTAADRDRAGFRLLRWLKNQTSFQRSGGWDHFITLGRITWDFRRYGDDGWGTNFVVLPGMANVTRLAIEADTLDPMDVGVPYPTGFHPHAAAD VRAWQRHVLSRKRSKLFGFAGAPRSGFRSDFRGVLLEECEDAGSERCRAVDCRGTRCTDNGAAVLELFLDSRFCLQPRGDSFTRGSMFDCMVAGAVPVLF WRRTAYDQY…
PvGT47_64	Pavir.J16733.1	unknown	contig185276:4-1699	RRAGRAPRRAGRQLPPGPAVEADDKRWSAAPVAASPSPSSPPPPPPSCEGRYVYMLDLPSRFDMLRDCVAGSPLFDDMWSWCAITV NAGLGPKVVPAAGNGSDGDSGIIPSTGWYSTDQYALEVIFHHWMRRYDCLTDDPAAATAVYVPYYPALELHQHLCGFNTTARDGPSEAFLRWLSAQPTWA ALGGRDHFMVAAKTTWMFRREPGGGDDGCGNNFLGQPETGNMTVLTYESNIWAPRDIAVPYPSYFHPSSAGEVAAWQARARAAPRPFLFAFAGARRLKGQ LVIRDRVFDVCEAAARRGRCGLVDCSHGLEGSITCRTAAKLVALFTSARFCLQPRGDSFMRRSSIDSVMAGCIPVFFHRASTLEAQYRWHEPAGPGPGGR SGHRGRYYV…
PvGT47_65	Pavir.J16864.1	unknown	contig186495:497-2185	MPESPEPSSTPGSPLDAATPSPVPALLRGSLLLLAFLVLQLVLFWSLLGSPASSRFLPAPGRRNTTWPNGAVDAGACEAGLVYVYD LPPEFNHDLVDDCESLWPWYSFCPYLTNGGFGEAAATLPVFFNVTRNVSLHSWYNTDQFQLEVIVHRRLLSHRCRTTDPSQASAFYVPFYVGLDVGSHLW GDNSTAADRDRAGLRLLRWLQNQTSFQRSGGWDHFITLGRITWDFRRYGDDGWGTNFVVLPGMTNVTRLAIEADTLDPMDVGVPYPTGFHPRAAADVRAW QRHVLSRRRSKLFGFAGAPRSGFRGDFRGVLLEECEDAGSERCRAVDCRGTRCTDNGAAVLELFLDSRFCLQPRGDSFTRRSMFDCMVAGAVPVLFWRRT AYDQYRWYL…
PvGT47_66	Pavir.J18034.1	unknown	contig198027:302-1973	MEAHYPKYLLYCLLIAGSWLISCLLHLQYLHLSLSSSIAAPRRAALLLPAPAVEADDKLWSASSVAASPSPSSPPPPLSCEGRYVY MLDLPSRFDMLRDCVAGSPLFDDMWSWCAITVNAGLGPKVVPAAGNGSDGDTGIIPSTGWYSTDQYALEVIFHQWMRRYECLTDDPAAATAVYVPYYPAL ELHQHLCGFNTTARDGPSEAFLRWLSSQPTWAALGGRDHFMVAAKTTWMFRREPGGGDDGCGNNFLGQPETGNMTVLTYESNIWAPRDIAVPYPSYFHPS SAGEVAAWQARARAAPRPFLFAFAGARRRKGQLAIRDRVFDVCEAAARCGLVDCSHGLEGSITCRTPAKLVSLFTSARFCLQPRGDSFMRRSSIDSVMAG CIPVFFHRA…
PvGT47_67	Pavir.J22710.1	unknown	contig247532:1-1122	MERVGAHGGKRWLPRLLLLAALSWLLMVYLHAAVFHAPAVRSPPHTSLVAVASDCEDCRRFLLRQEEQLKKIASASSSASASALPA AAGEDRRRPRTVGGGDACRGRYVYMHDLPPRFNADIIRNCRKTEDHWADMCRFLRNDGLGRPLADRIDGVIKSEAGWYDTHQFALDAIFHNRMKQYECLT TDSAEASAVFVPFYAGFDFVRYHWGYDNATRDAASVDLTEWLMARPEWRRMGGRDHFLVAGRTGWDFRRSNNVDPDWGNDLLVMPAGRNMSVLVLESAML HGSDYPVPYPTYFHPRSDADVLRWQDRVRAQRRTWLMAFVGAPRPDVPINIRVRDHVIAQCKATGACTMLGCARATGSTQCHTPGNIM
PvGT47_68	Pavir.J22761.1	unknown	contig248119:923-1862	MEAIKNKAKRPPLADKDYVPMGPIYRNAYAFHRSYLEMEKLFKVYVYEEGEPPVFHDGPC RSIYSTEGRFIYSMEMESRLRTRDPDLAHAFFLPFSVVKMVKMIYEPNSHDMGPLKRTVS DYISVLSTKYPYWNRSLGADHFMLSCHDWGPYVSSANDHLFGNSIRVLCNANTSEGFNLA KDVSLPEINLRSDVVDRQ
PvGT47_69	Pavir.J24375.1	unknown	contig267423:4-1720	MEAIKNKDKRPPLSDKDYVPMGPIYRNAYAFHRSYLEMEKLFKVYVYEEGEPPVFHDGPCRSIYSTEGRFIYSMEMESRLRTRDPD RAHAFFLPFSVVKMVKMIYEPNSHDMGPLKRTISDYIGVLSTKYPYWNRSLGADHFMLSCHDWGPYVSSANGHLFGNSIRVLCNANTSEGFNPAKDVSLP EINLRSDVVDRQVGGPSASRRPILAFFAGGNHGPVRPALLAHWKGKGEPDVQVSEYLPRGVSYSDMMRRSRFCLCPGGYEVASPRLAEAIYLECVPVVVD DGEYALPFADVLNWDAFAVRLRAADIPRLREVLAAVSPRQYIRMQRRVRAVRRHFMVHGGAPRRYDAFHMILHSVWLRRLNVRIAAQG*
PvGT47_70	Pavir.J25756.1	unknown	contig284947:8-1425	KDAADKSDGGRGGVLWPSRACYLVALATTFWAVASVLFQPSPFSLPLLPSVTVRRHSPHEQPPPAQPNQTAAADPCAGRYIYVHDL PPRFNDDIVRGCRALRPWMDMCPYMPNCGMGRPLGAEGGAFPGRGWFATDQFMLDVILRCRMRRYACLTADPARAAAVFVPAYASLDGGRHLWNGTATRD ALAADLAAWLARRPEWRAAGGRDHFLAAGRTAWDFLRKTDDDRDWGTKLLRLPAVRNMTALTAADVRAWQAKARAAERRWLFSFAGAARPGSNGTVRAEI FQQCGASSRCGMFRCAKGSECEASPGAVMRLFESSSFCLQPRGDTATRRSTFDAVVAGCIPVFFHPDSAYTQYTAHLPEEPERWSVLIMHTDVTARNVSI EETLARIPP…
PvGT47_71	Pavir.J27255.1	unknown	contig306157:3-839	MPGVANITRLVIERDPWDDMDVGVPYPTGFHPRAAADVRAWQRHVARRPRPMLFAFAGAPRSAIRGDFRALLLGECQAAGPAACGALDCAEGRCIRNNALVMELFMGARFCLQPRGDSFTRRSLFDCIVAGAVPVLFWRRSAYRQYGWYLPVGDGREAEWSVFIDREKLRAGNLTVRAVLAAIPEPRVRLMRERVVEMIPRLVYAAADRGKGLGGGMEDAVDVMVDGMLRRVAEQRPRWRPT*
PvGT47_72	Pavir.J27447.1	unknown	contig308644:11-868	MANPLSLFLLFLLNVAAAARAGTDGPDPCAGRRIHIRRVPPRFNADLLRHCGADAFPLSDASAAATSAPPCESLANHGLGPRTHPR SRSWYRTDARLLEPFFHRRVLERGCIADDPAHADAVFVPYYAALDALPYVLDPELLDASAQHGVELAEFLARDQPWILARRRGHDHFLVVSGSAWDYAQP PDAEPRMWGTTSLLRLPELANFTFLTLESRIWPWQEHAIPHLTSFHPASLPHLRAWLARARRSGRGTLMLFAGGVSRPSRPNIRGSILAECANRTDACAV
PvGT47_73	Pavir.J28363.1	unknown	contig321814:15-791	MANPISLFLLFLLNVAAAPRAAADGPDPCAGRRIHIRRVPPRFNADLLRHCGADAFPLADASAAATSAPPCESLANHGLGPRTHPR SRSWYRTDARLLEPFFHRRILERGCLADDPARADAVFVPYYAALDALPYVLDPELLDASARHGVELAEFLARDQPRILARRRGHDHFLVVSGSAWDYAQP PGAEPRMWGTTSLLRLPALANFTFLTLESRIWPWQEHAIPHLTSFHPASLPHLRAWLARARRSRRGTLMLFAA
PvGT47_74	Pavir.J29797.1	unknown	contig344022:161-1257	MSKSGGVSRPCFFLVAGAALWVLTLYLRLLAMMSVPGAFTGRAASLVAADGNRSGDPCRGRYVYIHDLPRGSTPTSSAAARRDRWA GMCEDVGNAGLGRPLSGGALTGETGWYATNQFALDAIFHARVRQYGCLTNDSSAAAAVFVPFYAGFEFARHIWGYDNAARDAAARDLVRWLVRRPEWRRA GGRDHFLVAGRTGWDFRRDAYPNATWGTNLFLLPAVKNMTFLVVETATMGWGNDLAVPYPTYFHPRTDSDVLNWQHRIRNADRWWFMSFVGAARPGDPCS IRSQVMDQCRASPACRQLGCASGTAQCHYPGDIMVLFQSSTFCLQPPGDSASRRSTFDAMVAGCIPVFFQPRSAYLQY
PvGT47_75	Pavir.J31181.1	unknown	contig367887:62-1030	VARRQERQRRAARRAAVADRCAGRYIYVQELPRRFNADLLRDCRSLSEWTDMCKHVANAGMGPRLTRTGGVLPPTGWYDTNQFTLE VVFHNRMRQYGCLTADASRAAAVYVPYYAGLDVGRHLWGFSNDVRDALAEDLVEWLRSTPAWAAHGGRDHFLVGGRIAWDFRRQDGGGEWGSRLLLLPEA RNMTALVLESGGPWHVGDVGVPYPTYFHPSRAAEVASWQRTVRRARRPWLFAFAGARRAGEGGTLRDTVIDQCARSRRCGLLQCGRGRRNDCYAPGNVMR HLRSAAFCLQPPGDSYTRRSAFDAMLAGCVPCLHRAR
